# Supplementary material for: Enantioselective assembly of tertiary stereocenters via multicomponent chemoselective cross-coupling of geminal chloro(iodo)alkanes
Source: Royal Society of Chemistry journal article supplement (doi:10.1039/c5sc04378f), 2016-01-01

**Enantioselective Assembly of Tertiary Stereocenters via Multicomponent  
Chemoselective Cross-Coupling of Geminal Chloro(iodo)alkanes**

Xiaojian Jiang, Kseniya Kulbitski, Gennady Nisnevich and Mark Gandelman\*

*Schulich Faculty of Chemistry, Technion - Israel Institute of Technology, Technion City, Haifa  
32000, Israel.*

*\*e-mail: [chmark@tx.technion.ac.il](mailto:chmark@tx.technion.ac.il).*

## **GENERAL METHODS**

General procedures ----- 3

Materials ----- 3

Instrumentation ----- 3

## **PREPARATION OF SUBSTRATES**

Representative procedure of synthesis geminal dihalide substrate -----4

## **SYNTHESIS OF DOUBLE CROSS-COUPLING PRODUCTS**

Representative procedure for the generation of coupling product ----- 8

Determination of absolute configuration ----- 12

References ----- 38

$^1\text{H}/^{13}\text{C}/^{19}\text{F}$  Spectra ----- 39

## GENERAL METHODS

### General Procedures

All reactions were generally performed in glove box or in dried glassware under an atmosphere of dry  $N_2$ . Reaction mixtures were stirred magnetically unless otherwise indicated and monitored by thin layer chromatography (TLC) on Merck precoated glass-backed silica gel 60 F-254 0,25 mm plates with visualization by fluorescence quenching at 254 nm. TLC plates were stained using potassium permanganate. Chromatography purification of products (flash column chromatography) was performed on silica gel 60 (70-230 mesh, Merck) using a forced flow of eluent at 0.3-0.5 bar. Concentration of reaction product solutions and chromatography fractions under reduced pressure was performed by rotary evaporation at 35-45°C at the appropriate pressure and then at rt, ca. 10 mmHg (vacuum pump) unless otherwise indicated.

### Materials

All chemicals, including dry solvents were purchased from Aldrich, Fluka, Acros, TCI, Merck, Strem, DiaminoPharm or Alfa Aesar and used as such unless stated otherwise. Yields given refer to chromatographically purified compounds unless otherwise demonstrated.

### Instrumentation

Infrared (IR) spectra were recorded on a FTIR-Bruker spectrophotometer and reported as wavenumber ( $cm^{-1}$ ) of the absorption maxima for the range between 4000  $cm^{-1}$  and 400  $cm^{-1}$  with only major peaks reported.  $^1H$  NMR spectra was recorded on Bruker 500 MHz, 400 MHz, 300 MHz and 200 MHz spectrometer.  $^{13}C$  NMR spectra was recorded on Bruker 125 MHz, 100 MHz, 75 MHz and 50 MHz spectrometer.  $^{19}F$  NMR spectra was recorded on Bruker 188 MHz.  $^1H$  NMR chemical shifts are expressed in parts per million ( $\delta$ ) downfield from tetramethylsilane (with the  $CHCl_3$  peak at 7.26 ppm used as standard).  $^{13}C$  NMR chemical shifts are expressed in parts per million ( $\delta$ ) downfield from tetramethylsilane (with the central peak of  $CHCl_3$  at 77.16 ppm used as standard).  $^{19}F$  NMR chemical shifts are expressed in parts per million ( $\delta$ ) (with the  $C_6F_6$  peak at -164.9 ppm used as standard). All  $^{13}C$  and  $^{19}F$  spectra were measured with complete proton decoupling. NMR coupling constants (J) are reported in Hertz (Hz), and splitting patterns are indicated as follows: br, broad; s, singlet; d, doublet; dd, doublet of doublet; ddd, doublet of doublet of doublet; dt, doublet of triplet; t, triplet; q, quartet; m, multiplet. High resolution mass

spectrometric measurements (HRMS) were performed by the Waters LCT Premier and Bruker maxis impact with APCI solid probe. Enantiomeric excess were determined by HPLC analysis on Shimadzu HPLC units including the following instruments: pump, LC-20AT; detector, SPD-M20A; column, Daicel chiralcel OJ-H or OD-H. Optical rotations were recorded on a polarimeter (Optical Activity LTD).

## PREPARATION OF SUBSTRATES

### Representative procedure of synthesis geminal dihalide substrate

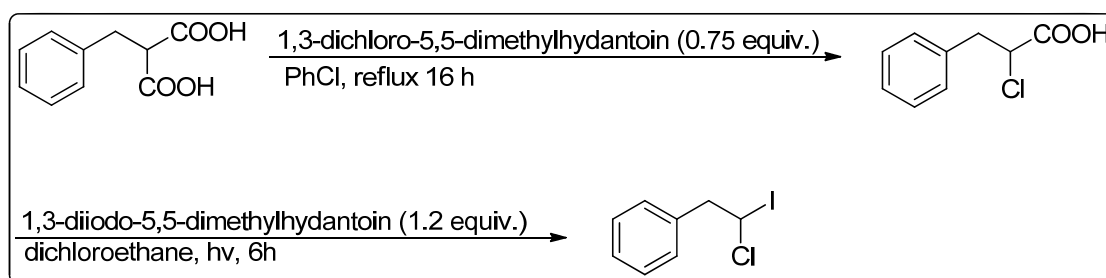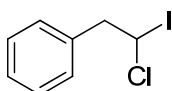

### (2-chloro-2-iodoethyl)benzene

In a 100 mL round bottom flask, benzyl malonic acid (1.16 g, 6 mmol) 1,3-dichloro-5,5-dimethylhydantoin (886 mg, 4.5 mmol) and PhCl 18 mL were charged at room temperature under N<sub>2</sub> flow. The mixture was heated to reflux and stirred for 16 h. The reaction mixture was then cooled to room temperature. After evaporating the solvent, the mixture was directly subjected to flash column chromatography using hexanes/EtOAc as eluent and obtained the desired Chloro-acid intermediate as yellow color oil, which was subjected to iodo-decarboxylation process followed by reported procedure<sup>1</sup>.

85%; Yellow oil; IR (neat) 3030, 3015, 699, 417; <sup>1</sup>H NMR (CDCl<sub>3</sub>, 400 MHz): δ 7.30-7.22 (m, 5H), 5.79-5.76 (t, *J* = 13.6 Hz, 1H), 3.67-3.51 (m, 2H); <sup>13</sup>C NMR (CDCl<sub>3</sub>, 100 MHz): δ 137.4, 129.4, 128.7, 128.5, 127.7, 52.8, 29.6; HRMS (APCI) calcd for C<sub>8</sub>H<sub>8</sub>NaClI [M + Na]<sup>+</sup>: 288.9257; found: 288.9230.

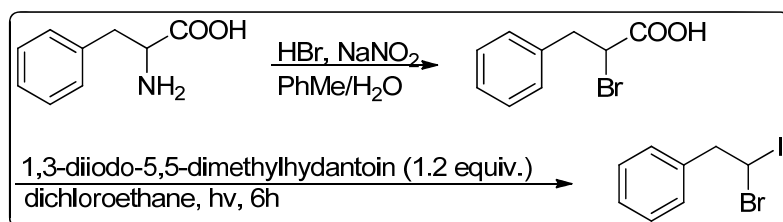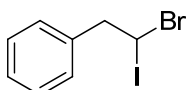

### (2-bromo-2-iodoethyl)benzene

In a 100 mL round bottom flask, 48% HBr (4.08g, 24.2 mmol), water 2 mL and PhMe 6 mL were charged at 15 °C under N<sub>2</sub> flow. The mixture was cooled down to 0 °C and phenylalanine (1g, 6 mmol) was added. The reaction mixture was cooled to -5 °C. A solution of NaNO<sub>2</sub> (543 mg, 7.9 mmol) in water 1mL was added dropwise to the reaction mixture. After the addition, the reaction mixture was brought to room temperature and stirred for another 3 h. The organic phase was separated and diluted with 10 mL toluene which subsequently washed with water (10 mL) then brine (10 mL). The organic phase was then dried over MgSO<sub>4</sub> and evaporated to produce the desired Bromo-acid intermediate which was subjected to next step (iodo-decarboxylation) without further purification.

80%; Yellow oil; IR (neat) 3020, 3007, 698, 402; <sup>1</sup>H NMR (CDCl<sub>3</sub>, 400 MHz): δ 7.31-7.19 (m, 5H), 5.53-5.50 (t, *J* = 7.2 Hz, 1H), 3.67-3.51 (m, 2H); <sup>13</sup>C NMR (CDCl<sub>3</sub>, 100 MHz): δ 137.4, 129.4, 128.7, 128.5, 127.7, 52.8, 29.6; HRMS (APCI) calcd for C<sub>8</sub>H<sub>8</sub>NaBrI [M + Na]<sup>+</sup>: 332.8752; found: 332.8750.

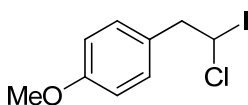

### 1-(2-chloro-2-iodoethyl)-4-methoxybenzene

76%; Yellow oil; IR (neat) 3031, 3015, 704, 414; <sup>1</sup>H NMR (CDCl<sub>3</sub>, 400 MHz): δ 7.14-6.82 (m, 4H), 5.73-5.70 (t, *J* = 6.8 Hz, 1H), 3.77 (s, 3H), 3.60-3.43 (m, 2H); <sup>13</sup>C NMR (CDCl<sub>3</sub>, 100 MHz): δ 159.1, 130.5, 129.6, 129.4, 114.0, 55.3, 51.9, 30.8; HRMS (APCI) calcd for C<sub>9</sub>H<sub>10</sub>OClI [M]<sup>+</sup>: 295.9465; found: 295.9467.

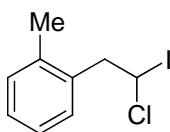

**1-(2-chloro-2-iodoethyl)-2-methylbenzene**

86%; Yellow oil; IR (neat) 3029, 3012, 701, 418;  $^1\text{H}$  NMR ( $\text{CDCl}_3$ , 400 MHz):  $\delta$  7.25-7.20 (m, 4H), 5.83-5.80 (t,  $J = 7.0$  Hz, 1H), 3.78-3.60 (m, 2H), 2.36 (s, 3H);  $^{13}\text{C}$  NMR ( $\text{CDCl}_3$ , 100 MHz):  $\delta$  136.4, 136.0, 130.8, 130.3, 127.9, 126.3, 50.2, 28.8, 19.7.

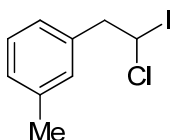

**1-(2-chloro-2-iodoethyl)-3-methylbenzene**

84%; Yellow oil; IR (neat) 3028, 3011, 698, 416;  $^1\text{H}$  NMR ( $\text{CDCl}_3$ , 200 MHz):  $\delta$  7.31-7.08 (m, 4H), 5.86-5.79 (t,  $J = 6.0$  Hz, 1H), 3.74-3.54 (m, 2H), 2.40 (s, 3H);  $^{13}\text{C}$  NMR ( $\text{CDCl}_3$ , 50 MHz):  $\delta$  138.3, 137.3, 130.1, 128.5, 128.4, 126.4, 52.8, 29.8, 21.4; HRMS (APCI) calcd for  $\text{C}_9\text{H}_{10}\text{ClI}$   $[\text{M}]^+$ : 279.9516; found: 279.9456.

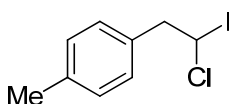

**1-(2-chloro-2-iodoethyl)-4-methylbenzene**

85%; Yellow oil; IR (neat) 3031, 3013, 699, 420;  $^1\text{H}$  NMR ( $\text{CDCl}_3$ , 300 MHz):  $\delta$  7.15 (s, board, 4H), 5.80-5.76 (t,  $J = 6.9$  Hz, 1H), 3.67-3.49 (m, 2H), 2.34 (s, 3H);  $^{13}\text{C}$  NMR ( $\text{CDCl}_3$ , 75 MHz):  $\delta$  137.3, 134.3, 129.3, 129.2, 52.3, 30.2, 21.2.

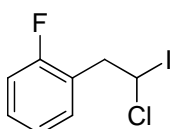

**1-(2-chloro-2-iodoethyl)-2-fluorobenzene**

82%; Yellow oil; IR (neat) 3024, 3012, 697, 415;  $^1\text{H}$  NMR ( $\text{CDCl}_3$ , 300 MHz):  $\delta$  7.35-7.02 (m, 4H), 5.90-5.85 (t,  $J = 6.4$  Hz, 1H), 3.77-3.58 (m, 2H);  $^{13}\text{C}$  NMR ( $\text{CDCl}_3$ , 75 MHz):  $\delta$  131.8 (d,  $J = 4.2$  Hz), 129.6 (d,  $J = 8.2$  Hz), 124.1 (d,  $J = 21.5$ Hz), 115.6 (d,  $J = 21.5$  Hz), 46.5, 27.3;  $^{19}\text{F}$  NMR ( $\text{CDCl}_3$ , 188 MHz):  $\delta$  -121.0.

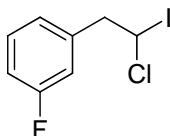

#### 1-(2-chloro-2-iodoethyl)-3-fluorobenzene

84%; Yellow oil; IR (neat) 3027, 3014, 696, 413;  $^1\text{H}$  NMR ( $\text{CDCl}_3$ , 200 MHz):  $\delta$  7.38-6.96 (m, 4H), 5.85-5.78 (t,  $J = 7.0$  Hz, 1H), 3.74-3.52 (m, 2H);  $^{13}\text{C}$  NMR ( $\text{CDCl}_3$ , 50 MHz):  $\delta$  130.2 (d,  $J = 8.2$  Hz), 125.0, 116.6 (d,  $J = 21.4$ Hz), 114.9 (d,  $J = 20.9$  Hz), 52.2, 28.2;  $^{19}\text{F}$  NMR ( $\text{CDCl}_3$ , 188 MHz):  $\delta$  -115.9; HRMS (APCI) calcd for  $\text{C}_8\text{H}_7\text{NaFCII}$   $[\text{M}+\text{Na}]^+$ : 306.9163; found: 306.9196.

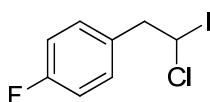

#### 1-(2-chloro-2-iodoethyl)-4-fluorobenzene

90%; Yellow oil; IR (neat) 3020, 3011, 698, 411;  $^1\text{H}$  NMR ( $\text{CDCl}_3$ , 200 MHz):  $\delta$  7.28-7.00 (m, 4H), 5.82-5.75 (t,  $J = 6.0$  Hz, 1H), 3.71-3.48 (m, 2H);  $^{13}\text{C}$  NMR ( $\text{CDCl}_3$ , 50 MHz):  $\delta$  131.2 (d,  $J = 8.1$  Hz), 115.8 (d,  $J = 21.4$  Hz), 51.7, 29.6;  $^{19}\text{F}$  NMR ( $\text{CDCl}_3$ , 188 MHz):  $\delta$  -117.6; HRMS (APCI) calcd for  $\text{C}_8\text{H}_7\text{NaFCII}$   $[\text{M}+\text{Na}]^+$ : 306.9163; found: 306.9160.

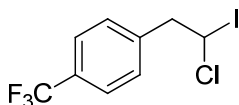

#### 1-(2-chloro-2-iodoethyl)-4-(trifluoromethyl)benzene

91%; Yellow oil; IR (neat) 3024, 3008, 697, 409;  $^1\text{H}$  NMR ( $\text{CDCl}_3$ , 300 MHz):  $\delta$  7.61-7.35 (m, 4H), 5.84-5.79 (t,  $J = 6.3$  Hz, 1H), 3.76-3.59 (m, 2H);  $^{13}\text{C}$  NMR ( $\text{CDCl}_3$ , 75 MHz):  $\delta$  141.0, 129.8, 125.6 (q,  $J = 4.1$  Hz), 52.0, 27.5;  $^{19}\text{F}$  NMR ( $\text{CDCl}_3$ , 188 MHz):  $\delta$  -65.8; HRMS (APCI) calcd for  $\text{C}_9\text{H}_9\text{OF}_3\text{CII}$   $[\text{M}+\text{H}_2\text{O}]^+$ : 351.9339; found: 351.9336.

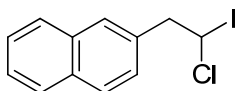

**2-(2-chloro-2-iodoethyl)naphthalene**

79%; Yellow oil; IR (neat) 3033, 3012, 702, 422;  $^1\text{H}$  NMR ( $\text{CDCl}_3$ , 200 MHz):  $\delta$  7.89-7.35 (m, 7H), 5.97-5.90 (t,  $J = 6.0$  Hz, 1H), 3.92-3.70 (m, 2H);  $^{13}\text{C}$  NMR ( $\text{CDCl}_3$ , 50 MHz):  $\delta$  135.2, 133.4, 128.4, 128.3, 127.8, 127.1, 126.4, 126.1, 52.8, 29.5; HRMS (APCI) calcd for  $\text{C}_{12}\text{H}_{10}\text{ClI}$   $[\text{M}]^+$ : 315.9510; found: 315.9542.

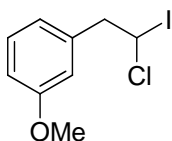

**1-(2-chloro-2-iodoethyl)-3-methoxybenzene**

77%; Yellow oil; IR (neat) 3025, 3014, 700, 423;  $^1\text{H}$  NMR ( $\text{CDCl}_3$ , 300 MHz):  $\delta$  7.68-6.59 (m, 4H), 5.97-5.92 (t,  $J = 7.2$  Hz, 1H), 3.85-3.58 (m, 5H);  $^{13}\text{C}$  NMR ( $\text{CDCl}_3$ , 75 MHz):  $\delta$  140.0, 135.9, 130.2, 117.6, 114.5, 55.5, 50.8, 26.6; HRMS (APCI) calcd for  $\text{C}_9\text{H}_{10}\text{OClI}$   $[\text{M}]^+$ : 295.9465; found: 295.9467.



## SYNTHESIS OF DOUBLE CROSS-COUPLING PRODUCTS

### Representative procedure for the generation of **3b**.

**1. Preparing of *n*-propyl-9BBN stock solution.** In a glove box, 9-BBN dimer (1.22g, 5 mmol) *i*-Pr<sub>2</sub>O (7 mL) was added in turn to a hydrogenation reactor. The reactor was capped and removed from the glove box. Propene gas was filled in the reactor and the reaction mixture was stirred under 5 atmospheres at room temperature (r.t.). After 16 hours, the reactor was taken back to the glove box and the reaction mixture was diluted with *i*-Pr<sub>2</sub>O to furnish a 1 M solution. Next, a portion of the solution (2 mL, 2 mmol) was added to a solution of KO<sup>t</sup>Bu (179 mg, 1.6 mmol) in *i*-BuOH (148 mg, 2 mmol) in a 10-mL vial. The resulting mixture was stirred at r.t. for at least 45 mins, extra *i*-Pr<sub>2</sub>O was added to make the solution with 0.5 M concentration.

### **2. Preparing of benzenepropyl-9BBN stock solution.**

In a glovebox, 9-BBN dimer (244 mg, 1 mmol), *i*-Pr<sub>2</sub>O (2 mL), and the Allyl benzene (260 mg, 2.2 mmol) were added in turn to a 10-mL vial and stirred for 24 h at room temperature. Next, this reaction mixture was added to a solution of KO<sup>t</sup>Bu (156 mg, 1.4 mmol) in *i*-BuOH (148 mg, 2.0 mmol) in a 10-mL vial. The resulting mixture was stirred at r.t. for at least 45 mins, extra *i*-Pr<sub>2</sub>O was added to make the solution with 0.5 M concentration.

A solution of NiCl<sub>2</sub>.glyme (11.0 mg, 0.050 mmol) and ligand **2** (14.4 mg, 0.06 mmol) in *i*-Pr<sub>2</sub>O (1 mL) in a 20-mL vial was stirred at r.t. for 2 h. Next, geminal iodide-chloride electrophile **1a** (133 mg, 0.5 mmol) was added followed by 5.5 mL of *i*-Pr<sub>2</sub>O, and then the solution of the activated *n*-propyl-9BBN (1.3 mL, 0.65 mmol) which contains KO<sup>t</sup>Bu (0.5 mmol) and *i*-BuOH (0.65 mmol) was added. After 24 h stirring, activated benzenepropyl-9BBN solution (2 mL, 1mmol) which contains KO<sup>t</sup>Bu (0.7 mmol) and *i*-BuOH (1 mmol) was added and the reaction mixture was stirred for another 48 h at r.t. before filtering through a silica gel, eluting with Et<sub>2</sub>O (30 mL). The solvent was removed by rotary evaporation, and the residue was purified by chromatography using an eluent of hexane/dichloromethane. The product ((*S*)-(2-propylpentane-1,5-diyl)dibenzene), was obtained as a colorless oil (113 mg, 85%).

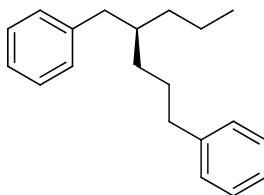

**(S)-(2-propylpentane-1,5-diyl)dibenzene**

85%; Colorless oil;  $[\alpha]_D^{25} + 12.5$  (c 1.0, CHCl<sub>3</sub>, 96% ee); IR (neat) 3027, 1321, 998, 746; <sup>1</sup>H NMR (CDCl<sub>3</sub>, 200 MHz): δ 7.32-7.08 (m, 10H), 2.63-2.56 (m, 4H), 1.74-1.59 (m, 3H), 1.31-1.27 (m, 6H), 0.93 (t, *J* = 6.0 Hz, 3H); <sup>13</sup>C NMR (CDCl<sub>3</sub>, 50 MHz): δ 143.0, 141.7, 129.2, 128.4, 128.3, 128.1, 125.6, 125.5, 40.5, 39.4, 36.3, 35.5, 32.8, 28.6, 19.7, 14.4; HRMS (APCI) calcd for C<sub>20</sub>H<sub>27</sub> [M]<sup>+</sup>: 267.2113; found: 267.2102; HPLC (Daicel Chiralcel OJ-H, *i*-PrOH/hexane = 1.5/98.5, 1.0 mL/min, 190 nm) t<sub>1</sub> = 6.5 min (major), t<sub>2</sub> = 7.2 min (minor).

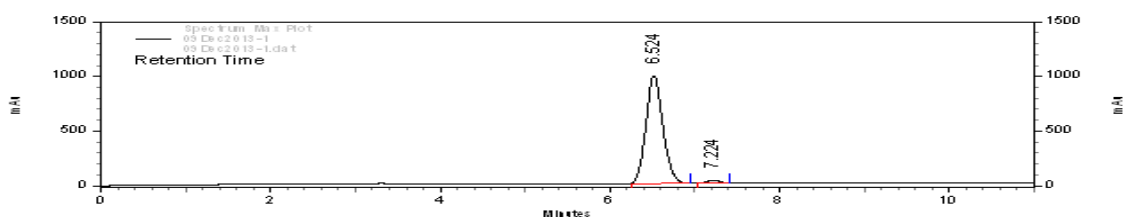

| Spectrum Max Plot Results |                 |                |                |                |
|---------------------------|-----------------|----------------|----------------|----------------|
| Retention Time            | Area            | Area Percent   | Height         |                |
| 6.524                     | 13676632        | 98.066         | 98692.7        | 97.499         |
| 7.224                     | 269725          | 1.934          | 2531.6         | 2.501          |
| <b>Totals</b>             | <b>13946357</b> | <b>100.000</b> | <b>1012243</b> | <b>100.000</b> |

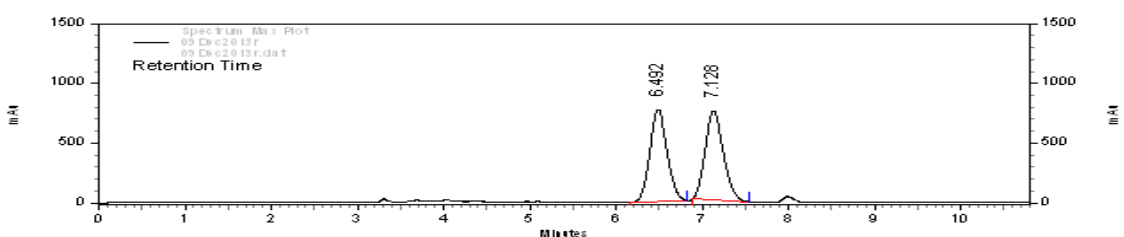

| Spectrum Max Plot Results |                 |                |                |                |
|---------------------------|-----------------|----------------|----------------|----------------|
| Retention Time            | Area            | Area Percent   | Height         |                |
| 6.492                     | 10684829        | 49.436         | 77176.7        | 50.836         |
| 7.128                     | 10928440        | 50.564         | 74637.6        | 49.164         |
| <b>Totals</b>             | <b>21613269</b> | <b>100.000</b> | <b>1518143</b> | <b>100.000</b> |

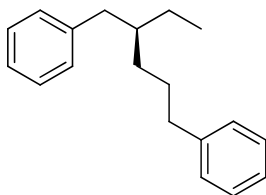

**(S)-(2-ethylpentane-1,5-diyl)dibenzene**

79%; Colorless oil;  $[\alpha]_D^{25} + 9.1$  (*c* 1.0, CHCl<sub>3</sub>, 92% ee); IR (neat) 3028, 1314, 1092, 768; <sup>1</sup>H NMR (CDCl<sub>3</sub>, 400 MHz): δ 7.24-7.08 (m, 10H), 2.54-2.48 (m, 3H), 1.62-1.57 (m, 4H), 1.23-1.20 (m, 4H), 0.84 (t, *J* = 7.2 Hz, 3H); <sup>13</sup>C NMR (CDCl<sub>3</sub>, 100 MHz): δ 142.8, 141.7, 129.2, 128.4, 128.2, 128.1, 125.6, 125.5, 41.2, 40.1, 36.3, 32.3, 28.6, 25.4, 10.8; HRMS (APCI) calcd for C<sub>19</sub>H<sub>25</sub> [M]<sup>+</sup>: 253.1956; found: 253.1960; HPLC (Daicel Chiralcel OJ-H, *i*-PrOH/hexane = 1.5/98.5, 1.0 mL/min, 190 nm) t<sub>1</sub> = 8.2 min (major), t<sub>2</sub> = 9.6 min (minor).

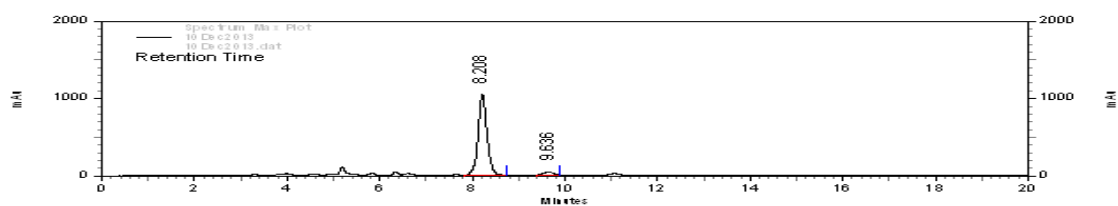

| Retention Time | Area            | Area Percent   | Height         |
|----------------|-----------------|----------------|----------------|
| 8.208          | 13704878        | 95.137         | 1040035        |
| 9.636          | 550654          | 3.863          | 39713          |
| <b>Totals</b>  | <b>14255532</b> | <b>100.000</b> | <b>1079749</b> |

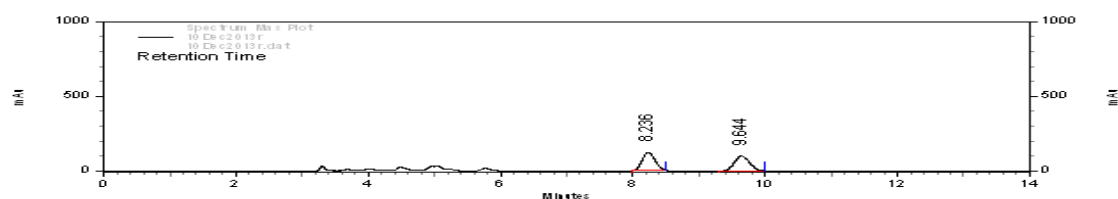

| Retention Time | Area           | Area Percent   | Height        |
|----------------|----------------|----------------|---------------|
| 8.236          | 1620901        | 50.361         | 120687        |
| 9.644          | 1597652        | 49.639         | 99783         |
| <b>Totals</b>  | <b>3218553</b> | <b>100.000</b> | <b>220470</b> |

## Determination of absolute configuration

The absolute configuration of the double cross-coupling product obtained with ligand (*R,R*)-**2** was determined to be (*S*) by comparison to the reported optical rotation<sup>2</sup>.

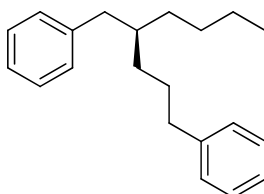

This result:  $[\alpha]_D^{25} + 7.9$  (*c* 1.0, CHCl<sub>3</sub>, 98% ee)

Reference 2:  $[\alpha]_D^{22} + 8.5$  (*c* 1.0, CHCl<sub>3</sub>, 93% ee)

### (*S*)-(2-butylpentane-1,5-diyldibenzene)<sup>2</sup>

80%;  $[\alpha]_D^{25} + 7.9$  (*c* 1.0, CHCl<sub>3</sub>, 98% ee); <sup>1</sup>H NMR (CDCl<sub>3</sub>, 200 MHz): δ 7.33-7.12 (m, 10H), 2.61-2.53 (m, 4H), 1.76-1.56 (m, 3H), 1.38-1.26 (m, 7H), 0.95-0.81 (m, 4H); <sup>13</sup>C NMR (CDCl<sub>3</sub>, 50 MHz): δ 142.9, 141.7, 129.2, 128.3, 128.2, 128.1, 125.6, 125.5, 40.5, 39.5, 36.3, 32.8, 28.8, 28.5, 23.0, 14.1; HPLC (Daicel Chiralcel OD-H, *i*-PrOH/hexane = 0/100, 1.0 mL/min, 190 nm) t<sub>1</sub> = 13.3 min (minor), t<sub>2</sub> = 21.6 min (major).

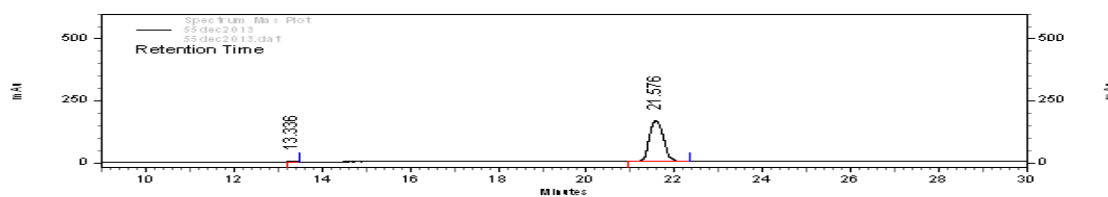

| Retention Time | Area    | Area Percent | Height |         |
|----------------|---------|--------------|--------|---------|
| 13.336         | 32379   | 0.887        | 3315   | 1.987   |
| 21.576         | 3617526 | 99.113       | 163538 | 98.013  |
| Totals         | 3649905 | 100.000      | 166853 | 100.000 |

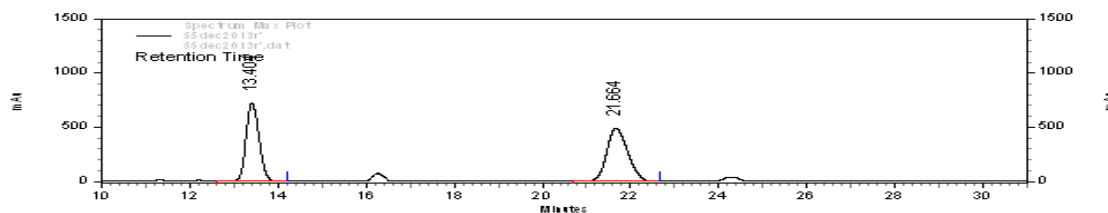

| Retention Time | Area     | Area Percent | Height  |         |
|----------------|----------|--------------|---------|---------|
| 13.404         | 14824646 | 48.237       | 722319  | 59.788  |
| 21.664         | 15909105 | 51.763       | 485604  | 40.202  |
| Totals         | 30732751 | 100.000      | 1207923 | 100.000 |

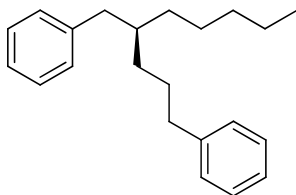

**(S)-(2-pentylpentane-1,5-diyl)dibenzene**

81%; Colorless oil;  $[\alpha]_D^{25} + 6.7$  ( $c$  1.0,  $\text{CHCl}_3$ , 80% ee); IR (neat) 3019, 1300, 982, 708;  $^1\text{H}$  NMR ( $\text{CDCl}_3$ , 300 MHz):  $\delta$  7.28-7.10 (m, 10H), 2.57-2.50 (m, 4H), 1.60-1.58 (m, 3H), 1.34-1.22 (m, 11H), 0.88 (t,  $J = 6.6$  Hz, 3H);  $^{13}\text{C}$  NMR ( $\text{CDCl}_3$ , 75 MHz):  $\delta$  142.6, 141.3, 129.1, 128.3, 128.1, 128.0, 125.5, 125.4, 40.4, 39.5, 36.2, 32.9, 32.6, 32.1, 28.4, 26.1, 22.6, 14.0; HRMS (APCI) calcd for  $\text{C}_{22}\text{H}_{31}$   $[\text{M}+1]^+$ : 295.2426; found: 295.2429. HPLC (Daicel Chiralcel OD-H, *i*-PrOH/hexane = 0.2/99.8, 1.0 mL/min, 190 nm)  $t_1 = 11.8$  min (minor),  $t_2 = 17.8$  min (major).

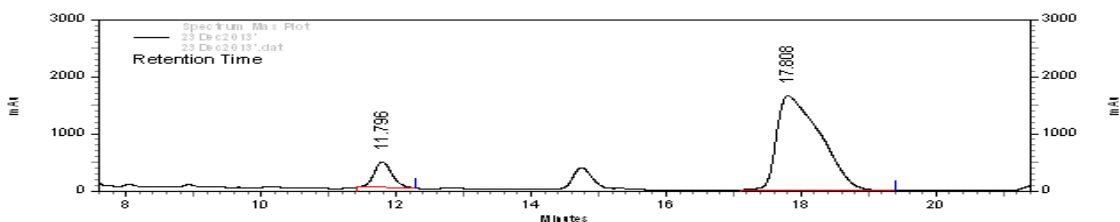

| Retention Time | Area     | Area Percent | Height  |         |
|----------------|----------|--------------|---------|---------|
| 11.796         | 8409734  | 10.227       | 450330  | 21.430  |
| 17.808         | 73817469 | 89.773       | 1651030 | 78.570  |
| Totals         | 82227203 | 100.000      | 2101360 | 100.000 |

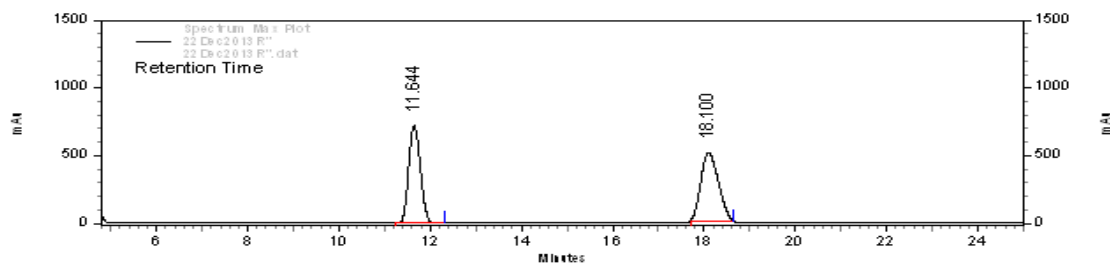

| Retention Time | Area     | Area Percent | Height  |         |
|----------------|----------|--------------|---------|---------|
| 11.644         | 12813448 | 48.628       | 719005  | 58.848  |
| 18.100         | 13536232 | 51.372       | 502800  | 41.152  |
| Totals         | 26349680 | 100.000      | 1221805 | 100.000 |

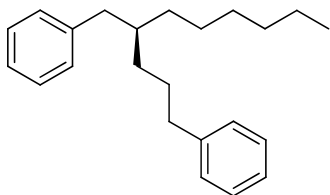

**(S)-(2-hexylpentane-1,5-diyl)dibenzene**

83%; Colorless oil;  $[\alpha]_D^{25}$  - 3.2 (*c* 1.0, CHCl<sub>3</sub>, 89% ee); IR (neat) 3020, 1294, 987, 729; <sup>1</sup>H NMR (CDCl<sub>3</sub>, 200 MHz): δ 7.33-7.12 (m, 10H), 2.62-2.54 (m, 4H), 1.70-1.55 (m, 4H), 1.38-1.27 (m, 12H), 0.93 (t, *J* = 6.1 Hz, 3H); <sup>13</sup>C NMR (CDCl<sub>3</sub>, 50 MHz): δ 142.8.0, 141.7, 129.2, 128.4, 128.2, 128.1, 125.6, 40.5, 39.6, 36.3, 33.1, 32.8, 31.9, 29.7, 28.5, 26.5, 22.7, 14.1; HRMS (APCI) calcd for C<sub>23</sub>H<sub>33</sub> [M+]<sup>+</sup>: 309.2582; found: 309.2589. HPLC (Daicel Chiralcel OD-H, *i*-PrOH/hexane = 0.5/99.5, 1.0 mL/min, 190 nm) t<sub>1</sub> = 9.2 min (major), t<sub>2</sub> = 13.3 min (minor).

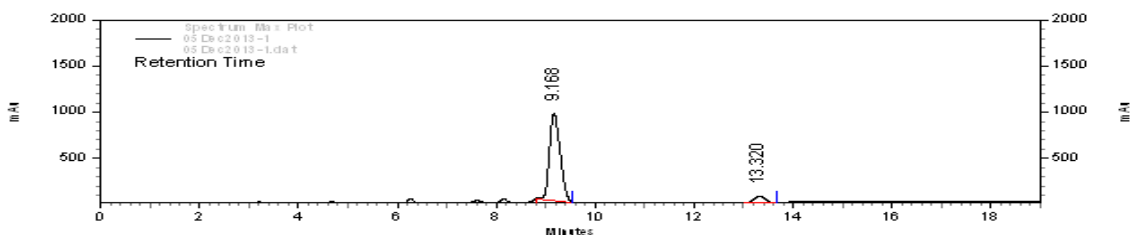

| Retention Time | Area            | Area Percent   | Height        |
|----------------|-----------------|----------------|---------------|
| 9.168          | 14259245        | 94.508         | 938157        |
| 13.320         | 828689          | 5.492          | 59455         |
| <b>Totals</b>  | <b>15087934</b> | <b>100.000</b> | <b>997612</b> |

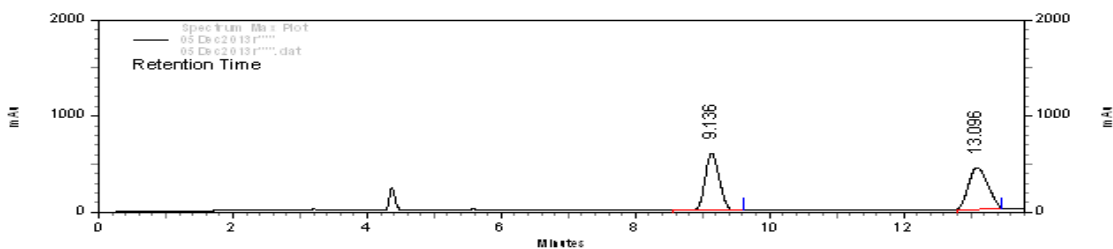

| Retention Time | Area            | Area Percent   | Height         |
|----------------|-----------------|----------------|----------------|
| 9.136          | 8301800         | 49.169         | 587014         |
| 13.096         | 8582537         | 50.831         | 430213         |
| <b>Totals</b>  | <b>16884337</b> | <b>100.000</b> | <b>1017227</b> |

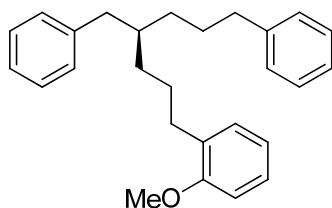

**(S)-2-(2-(3-(2-methoxyphenyl)propyl)pentane-1,5-diyl)dibenzene**

68%; Colorless oil;  $[\alpha]_D^{25}$  - 14.6 (*c* 1.0, CHCl<sub>3</sub>, 78% ee); IR (neat) 3017, 1287, 1011, 705; <sup>1</sup>H NMR (CDCl<sub>3</sub>, 200 MHz): δ 7.35-6.77 (m, 14H), 3.85 (s, 3H), 2.64-2.48 (m, 6H), 1.73-1.59 (m, 5H), 1.39-1.26 (m, 4H); <sup>13</sup>C NMR (CDCl<sub>3</sub>, 50 MHz): δ 157.4, 142.8, 141.6, 131.2, 129.8, 129.3, 128.4, 128.3, 128.1, 126.9, 125.6, 125.5, 120.3, 110.2, 55.3, 40.4, 39.3, 32.9, 32.7, 30.5, 28.5, 26.8; HRMS (APCI) calcd for C<sub>27</sub>H<sub>33</sub>O [M+1]<sup>+</sup>: 373.2531; found: 373.2516. HPLC (Daicel Chiralcel OD-H, *i*-PrOH/hexane = 1.5/98.5, 1.0 mL/min, 190 nm) t<sub>1</sub> = 8.9 min (minor), t<sub>2</sub> = 9.7 min (major).

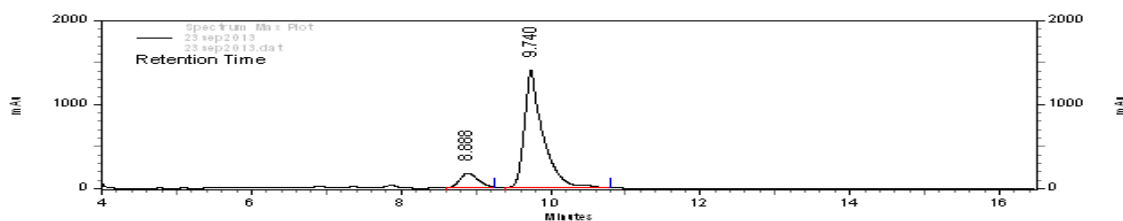

| Retention Time | Area            | Area Percent   | Height         |
|----------------|-----------------|----------------|----------------|
| 8.888          | 2894026         | 10.807         | 171796         |
| 9.740          | 23885945        | 89.193         | 1402401        |
| <b>Totals</b>  | <b>26779971</b> | <b>100.000</b> | <b>1574197</b> |

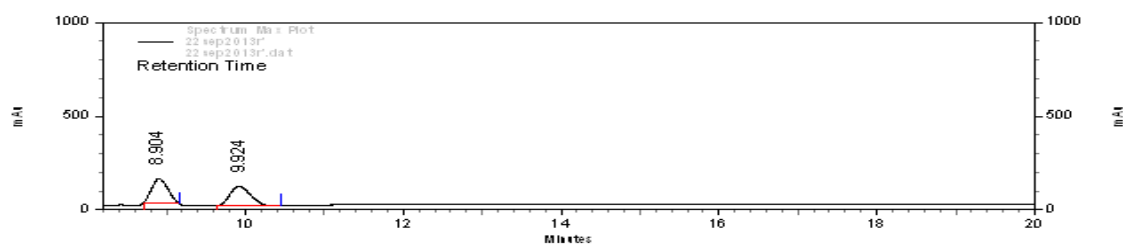

| Retention Time | Area           | Area Percent   | Height        |
|----------------|----------------|----------------|---------------|
| 8.904          | 1850823        | 51.796         | 131440        |
| 9.924          | 1722458        | 48.204         | 98433         |
| <b>Totals</b>  | <b>3573281</b> | <b>100.000</b> | <b>229873</b> |

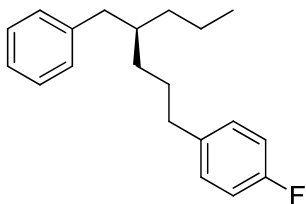

**(S)-1-(4-benzylheptyl)-4-fluorobenzene**

81%; Colorless oil;  $[\alpha]_D^{25} + 10.3$  (*c* 1.0, CHCl<sub>3</sub>, 92% ee); IR (neat) 3040, 3012, 1491, 1452, 798; <sup>1</sup>H NMR (CDCl<sub>3</sub>, 400 MHz): δ 7.25-6.90 (m, 9H), 2.55-2.43 (m, 4H), 1.66-1.55 (m, 3H), 1.29-1.19 (m, 6H), 0.85 (t, *J* = 6.8 Hz, 3H); <sup>13</sup>C NMR (CDCl<sub>3</sub>, 100 MHz): δ 162.4 (d, *J* = 241.3 Hz), 141.6, 138.4 (d, *J* = 3.1 Hz), 129.7 (d, *J* = 7.7 Hz), 129.2, 128.3 (d, *J* = 15.8 Hz), 125.6, 115.0 (d, *J* = 20.9 Hz), 40.5, 39.4, 35.6, 35.4, 35.1, 32.6, 31.5, 29.0, 28.6, 19.7, 14.4; <sup>19</sup>F NMR (CDCl<sub>3</sub>, 188 MHz): δ -121.4; HRMS (APCI) calcd for C<sub>20</sub>H<sub>26</sub>F [M+]<sup>+</sup>: 285.2019; found: 285.2023; HPLC (Daicel Chiralcel OJ-H, *i*-PrOH/hexane = 1.5/98.5, 1.0 mL/min, 190 nm) t<sub>1</sub> = 6.2 min (minor), t<sub>2</sub> = 6.9 min (major).

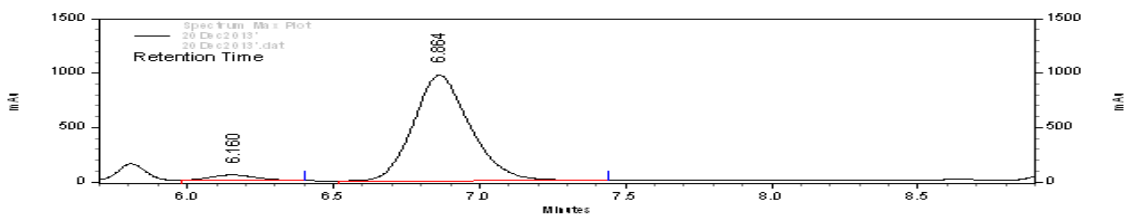

| Retention Time | Area     | Area Percent | Height  |         |
|----------------|----------|--------------|---------|---------|
| 6.160          | 539273   | 3.958        | 49174   | 4.814   |
| 6.864          | 13085748 | 96.042       | 972288  | 95.186  |
| Totals         | 13625021 | 100.000      | 1021462 | 100.000 |

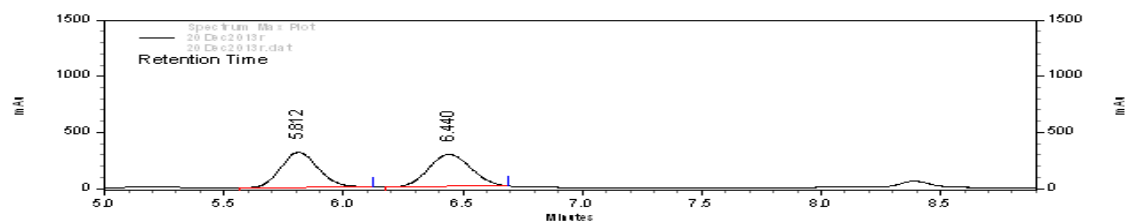

| Retention Time | Area    | Area Percent | Height |         |
|----------------|---------|--------------|--------|---------|
| 5.812          | 3417457 | 49.177       | 313649 | 52.176  |
| 6.440          | 3531887 | 50.823       | 287487 | 47.824  |
| Totals         | 6949344 | 100.000      | 601136 | 100.000 |



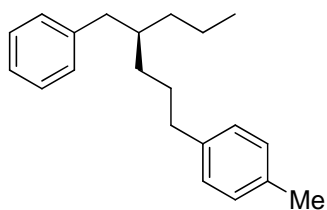

**(S)-1-(4-benzylheptyl)-4-methylbenzene**

85%; Colorless oil;  $[\alpha]_D^{25} + 20.6$  ( $c$  1.0,  $\text{CHCl}_3$ , 87% ee); IR (neat) 3044, 3011, 1495, 1453, 799;  $^1\text{H}$  NMR ( $\text{CDCl}_3$ , 200 MHz):  $\delta$  7.29-7.08 (m, 9H), 2.58-2.51 (m, 4H), 2.36 (s, 3H), 1.56-1.35 (m, 3H), 1.34-1.27 (m, 6H), 0.91 (t,  $J = 7.8$  Hz, 3H);  $^{13}\text{C}$  NMR ( $\text{CDCl}_3$ , 50 MHz):  $\delta$  142.1, 139.9, 135.1, 129.2, 128.9, 128.2, 128.1, 40.5, 39.4, 35.9, 35.5, 32.9, 28.8, 21.0, 19.7, 14.5; HRMS (APCI) calcd for  $\text{C}_{21}\text{H}_{29}$   $[\text{M}+1]^+$ : 281.2269; found: 281.2273. HPLC (Daicel Chiralcel OJ-H, *i*-PrOH/hexane = 4/96, 1.0 mL/min, 190 nm)  $t_1 = 4.8$  min (minor),  $t_2 = 5.4$  min (major).

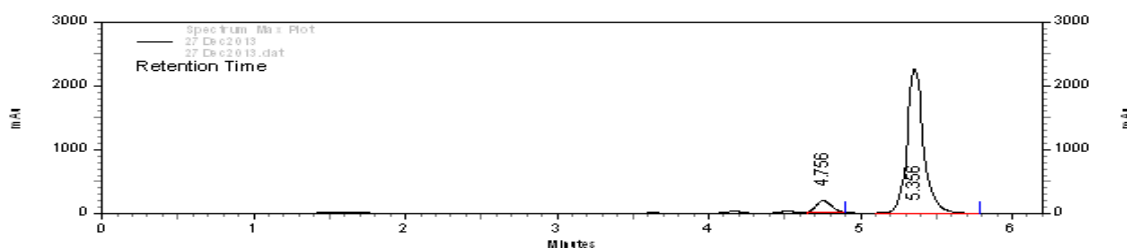

| Retention Time | Area     | Area Percent | Height  |
|----------------|----------|--------------|---------|
| 4.756          | 1229157  | 6.614        | 180391  |
| 5.356          | 17355870 | 93.386       | 2251890 |
| Totals         | 18585027 | 100.000      | 2432281 |

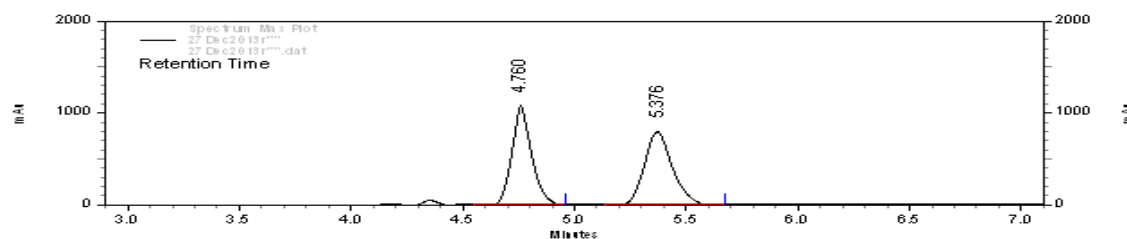

| Retention Time | Area     | Area Percent | Height  |
|----------------|----------|--------------|---------|
| 4.760          | 6484724  | 48.905       | 1078324 |
| 5.376          | 6775040  | 51.095       | 793433  |
| Totals         | 13259764 | 100.000      | 1871757 |

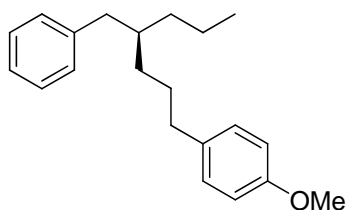

**(S)-1-(4-benzylheptyl)-4-methoxybenzene**

88%; Colorless oil;  $[\alpha]_D^{25} + 10.1$  ( $c$  1.0,  $\text{CHCl}_3$ , 82% ee); IR (neat) 3042, 3016, 1493, 1450, 792;  $^1\text{H}$  NMR ( $\text{CDCl}_3$ , 400 MHz):  $\delta$  7.24-6.77 (m, 9H), 3.76 (s, 3H), 2.57-2.44 (m, 4H), 1.66-1.55 (m, 3H), 1.28-1.15 (m, 6H), 0.94 (t,  $J = 6.8$  Hz, 3H);  $^{13}\text{C}$  NMR ( $\text{CDCl}_3$ , 100 MHz):  $\delta$  157.6, 141.7, 134.9, 129.2, 129.1, 128.1, 125.5, 113.7, 55.3, 40.5, 39.4, 35.5, 35.3, 32.7, 28.8, 19.7, 14.4; HRMS (APCI) calcd for  $\text{C}_{21}\text{H}_{29}\text{O}$   $[\text{M}+1]^+$ : 297.2218; found: 297.2173. HPLC (Daicel Chiralcel OJ-H, *i*-PrOH/hexane = 1.5/98.5, 1.0 mL/min, 190 nm)  $t_1 = 11.6$  min (minor),  $t_2 = 14.0$  min (major).

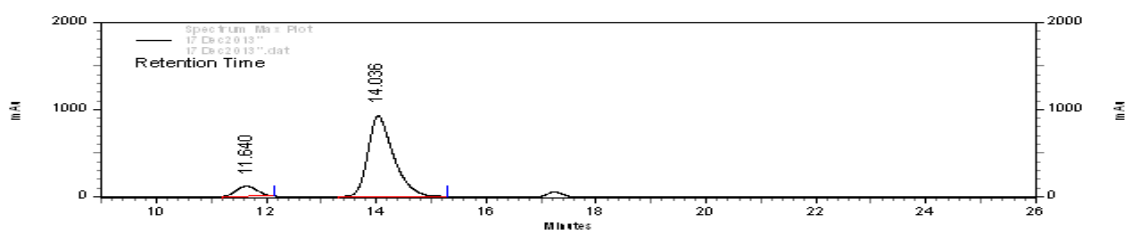

| Retention Time | Area      | Area Percent | Height  |
|----------------|-----------|--------------|---------|
| 11.640         | 299875.7  | 9.158        | 114143  |
| 14.036         | 2974624.2 | 90.842       | 930236  |
| Totals         | 32744999  | 100.000      | 1044379 |

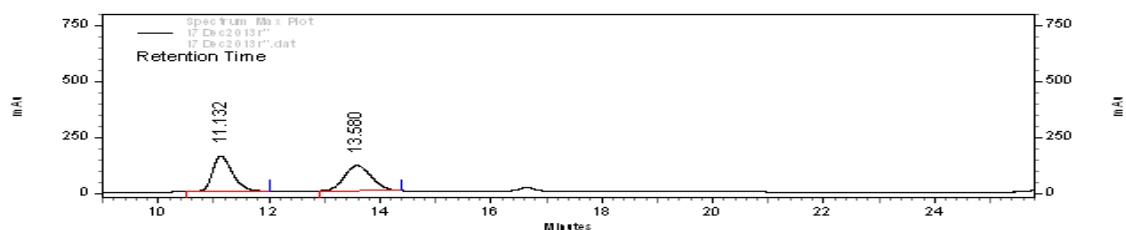

| Retention Time | Area     | Area Percent | Height |
|----------------|----------|--------------|--------|
| 11.132         | 387334.0 | 50.253       | 156274 |
| 13.580         | 383436.4 | 49.747       | 112251 |
| Totals         | 7707704  | 100.000      | 268525 |

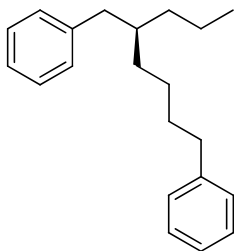

**(S)-(2-propylhexane-1,6-diyl)dibenzene**

81%; Colorless oil;  $[\alpha]_D^{25} + 7.4$  ( $c$  1.0,  $\text{CHCl}_3$ , 78% ee); IR (neat) 3040, 3017, 1490, 1452, 799;  $^1\text{H}$  NMR ( $\text{CDCl}_3$ , 400 MHz):  $\delta$  7.24-7.08 (m, 10H), 2.58-2.48 (m, 4H), 1.60-1.50 (m, 4H), 1.32-1.18 (m, 7H), 0.84 (t,  $J = 7.6$  Hz, 3H);  $^{13}\text{C}$  NMR ( $\text{CDCl}_3$ , 100 MHz):  $\delta$  142.7, 141.6, 129.1, 128.3, 128.1, 128.0, 125.4, 125.3, 40.4, 39.3, 35.8, 35.4, 32.8, 31.7, 26.1, 19.6, 14.3; HRMS (APCI) calcd for  $\text{C}_{21}\text{H}_{29}$   $[\text{M}+1]^+$ : 281.2245; found: 281.2254. HPLC (Daicel Chiralcel OJ-H, *i*-PrOH/hexane = 1/99, 1.0 mL/min, 190 nm)  $t_1 = 13.8$  min (minor),  $t_2 = 16.2$  min (major).

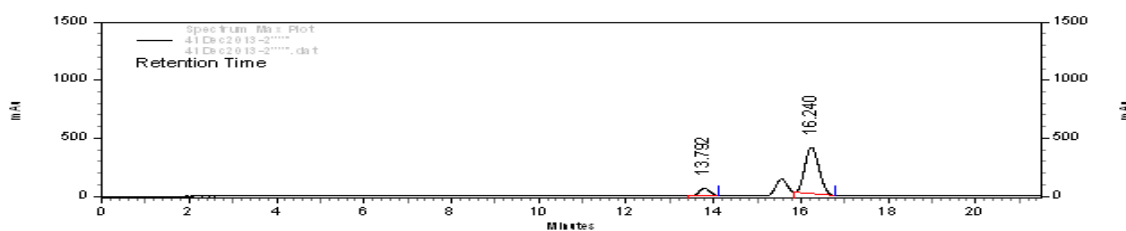

| Retention Time | Area     | Area Percent | Height |
|----------------|----------|--------------|--------|
| 13.792         | 1132423  | 11.145       | 67064  |
| 16.240         | 9027985  | 88.855       | 400655 |
| Totals         | 10160408 | 100.000      | 467719 |

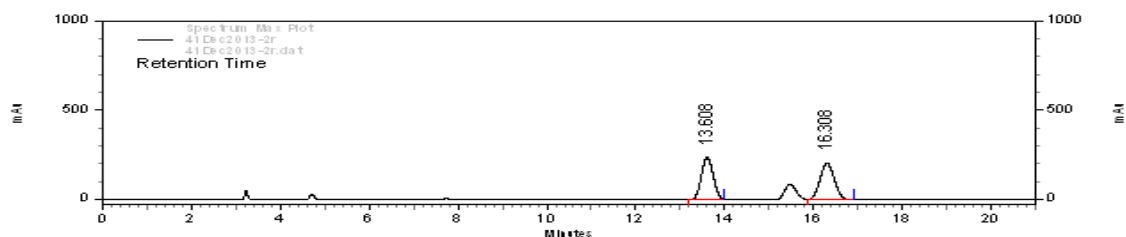

| Retention Time | Area    | Area Percent | Height |
|----------------|---------|--------------|--------|
| 13.608         | 4305038 | 49.296       | 234438 |
| 16.308         | 4427962 | 50.704       | 201651 |
| Totals         | 8733000 | 100.000      | 436089 |

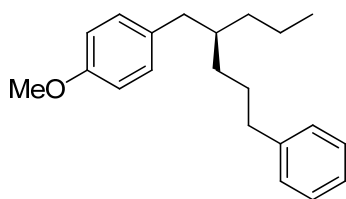

**(S)-1-methoxy-4-(5-phenyl-2-propylpentyl)benzene**

82%; Colorless oil;  $[\alpha]_D^{25} + 5.4$  ( $c$  1.0,  $\text{CHCl}_3$ , >99% ee); IR (neat) 3029, 3015, 1458, 704;  $^1\text{H}$  NMR ( $\text{CDCl}_3$ , 200 MHz):  $\delta$  7.34-6.80 (m, 9H), 3.81 (s, 3H), 2.61-2.47 (m, 4H), 1.71-1.36 (m, 9H), 0.91 (t,  $J = 6.0$  Hz, 3H);  $^{13}\text{C}$  NMR ( $\text{CDCl}_3$ , 50 MHz):  $\delta$  157.5, 142.8, 133.7, 130.0, 128.4, 128.2, 125.6, 113.5, 55.2, 39.5, 36.3, 35.5, 32.7, 28.6, 19.7, 14.4; HRMS (APCI) calcd for  $\text{C}_{21}\text{H}_{29}\text{O}$   $[\text{M}+1]^+$ : 297.2218; found: 297.2220; HPLC (Daicel Chiralcel OJ-H, *i*-PrOH/hexane = 4/96, 1.0 mL/min, 190 nm)  $t_1 = 6.7$  min (minor),  $t_2 = 8.1$  min (major).

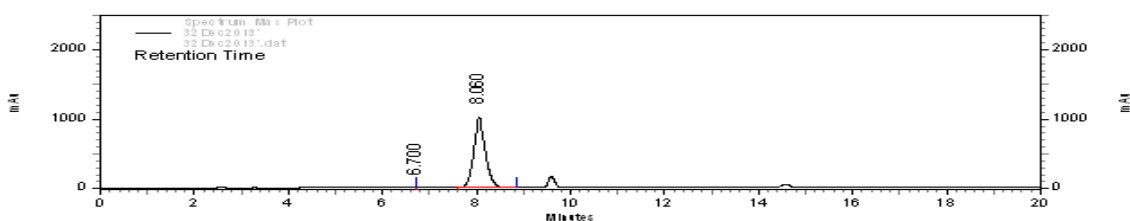

| Spectrum Max Plot Results |          |              |         |         |
|---------------------------|----------|--------------|---------|---------|
| Retention Time            | Area     | Area Percent | Height  |         |
| 6.700                     | 0        | 0.000        | 0       | 0.000   |
| 8.060                     | 16967386 | 100.000      | 1010643 | 100.000 |
| Totals                    | 16967386 | 100.000      | 1010643 | 100.000 |

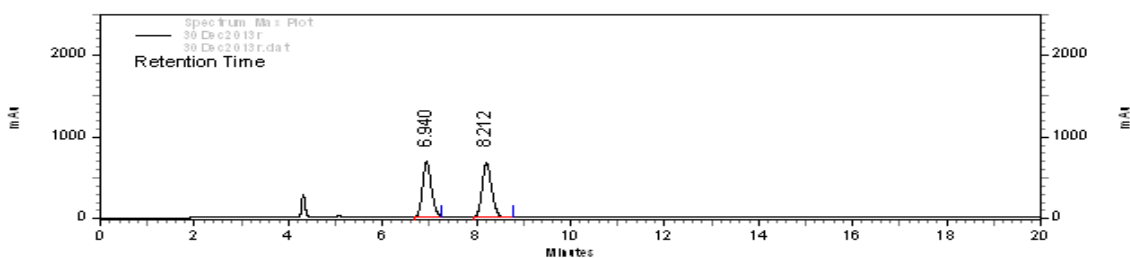

| Spectrum Max Plot Results |          |              |         |         |
|---------------------------|----------|--------------|---------|---------|
| Retention Time            | Area     | Area Percent | Height  |         |
| 6.940                     | 8828168  | 49.264       | 677877  | 50.550  |
| 8.212                     | 9091832  | 50.736       | 663117  | 49.450  |
| Totals                    | 17920000 | 100.000      | 1340994 | 100.000 |

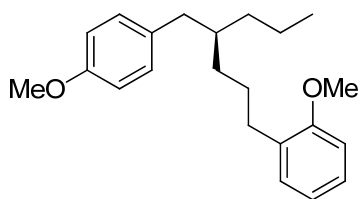

**(S)-1-methoxy-2-(4-(4-methoxybenzyl)heptyl)benzene**

88%; Colorless oil;  $[\alpha]_D^{25} + 16.7$  ( $c$  1.0,  $\text{CHCl}_3$ , >99% ee); IR (neat) 3044, 3017, 1464, 731;  $^1\text{H}$  NMR ( $\text{CDCl}_3$ , 200 MHz):  $\delta$  7.27-6.82 (m, 8H), 3.85 (s, 3H), 3.82 (s, 3H), 2.51-2.48 (m, 4H), 1.72-1.23 (m, 9H), 0.92 (t,  $J = 6.0$  Hz, 3H);  $^{13}\text{C}$  NMR ( $\text{CDCl}_3$ , 50 MHz):  $\delta$  134.1, 131.5, 130.1, 129.8, 126.8, 120.3, 113.5, 110.2, 55.2, 39.5, 35.4, 32.9, 30.5, 26.8, 19.7, 14.5; HRMS (APCI) calcd for  $\text{C}_{22}\text{H}_{31}\text{O}_2$   $[\text{M}+1]^+$ : 327.2324; found: 327.2320; HPLC (Daicel Chiralcel OJ-H,  $i$ -PrOH/hexane = 2/98, 1.0 mL/min, 190 nm)  $t_1 = 9.1$  min (minor),  $t_2 = 9.8$  min (major).

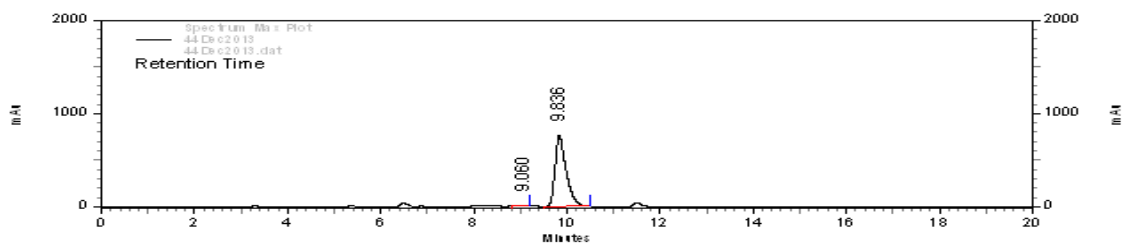

| Spectrum Max Plot Results |          |              |        |  |         |
|---------------------------|----------|--------------|--------|--|---------|
| Retention Time            | Area     | Area Percent | Height |  |         |
| 9.060                     | 32291    | 0.255        | 4642   |  | 0.601   |
| 9.836                     | 12635003 | 99.745       | 768148 |  | 99.399  |
| Totals                    | 12667294 | 100.000      | 772790 |  | 100.000 |

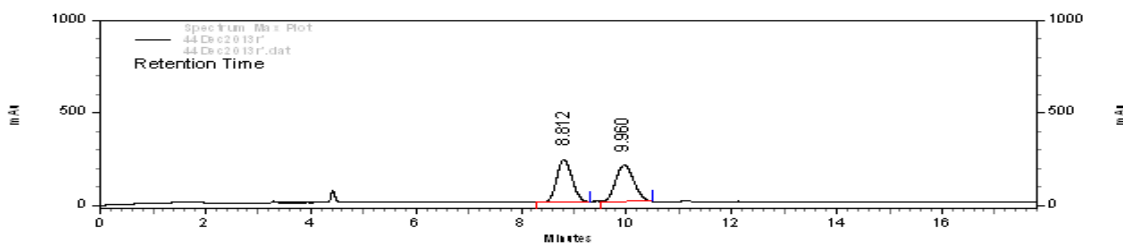

| Spectrum Max Plot Results |         |              |        |  |         |
|---------------------------|---------|--------------|--------|--|---------|
| Retention Time            | Area    | Area Percent | Height |  |         |
| 8.812                     | 4674004 | 49.944       | 231025 |  | 54.225  |
| 9.960                     | 4684441 | 50.056       | 195022 |  | 45.775  |
| Totals                    | 9358445 | 100.000      | 426047 |  | 100.000 |

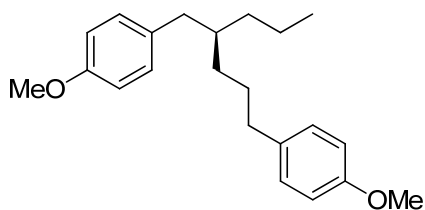

**(S)-4,4'-(2-propylpentane-1,5-diyl)bis(methoxybenzene)**

87%; Colorless oil;  $[\alpha]_D^{25} + 12.9$  ( $c$  1.0,  $\text{CHCl}_3$ , 94% ee); IR (neat) 3062, 3013, 1467, 722;  $^1\text{H}$  NMR ( $\text{CDCl}_3$ , 300 MHz):  $\delta$  7.06-6.77 (m, 8H), 3.78 (s, 6H), 2.49-2.40 (m, 4H), 1.62-1.18 (m, 9H), 0.86 (t,  $J = 6.3$  Hz, 3H);  $^{13}\text{C}$  NMR ( $\text{CDCl}_3$ , 75 MHz):  $\delta$  134.8, 133.8, 129.9, 129.1, 113.5, 113.4, 55.1, 39.4, 35.3, 35.2, 32.5, 28.7, 19.6, 14.3; HRMS (APCI) calcd for  $\text{C}_{22}\text{H}_{31}\text{O}_2$   $[\text{M}+1]^+$ : 327.2324; found: 327.2320. HPLC (Daicel Chiralcel OD-H,  $i$ -PrOH/hexane = 2/98, 1.0 mL/min, 190 nm)  $t_1 = 5.9$  min (minor),  $t_2 = 6.3$  min (major).

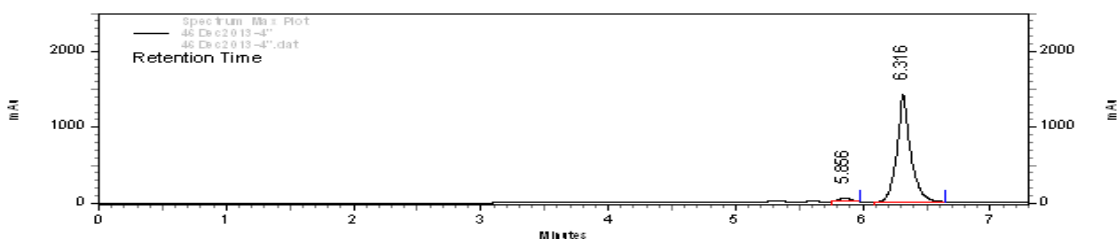

| Retention Time | Area     | Area Percent | Height  |         |
|----------------|----------|--------------|---------|---------|
| 5.856          | 304071   | 2.785        | 42003   | 2.869   |
| 6.316          | 10613184 | 97.215       | 1422228 | 97.131  |
| Totals         | 10917255 | 100.000      | 1464231 | 100.000 |

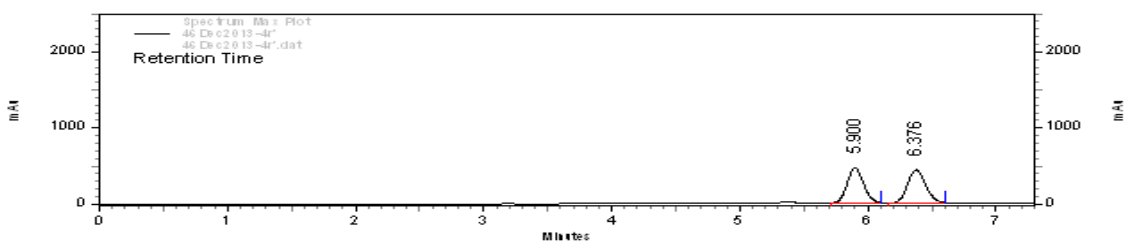

| Retention Time | Area    | Area Percent | Height |         |
|----------------|---------|--------------|--------|---------|
| 5.900          | 4074350 | 48.954       | 466404 | 51.748  |
| 6.376          | 4248490 | 51.046       | 434895 | 48.252  |
| Totals         | 8322840 | 100.000      | 901299 | 100.000 |

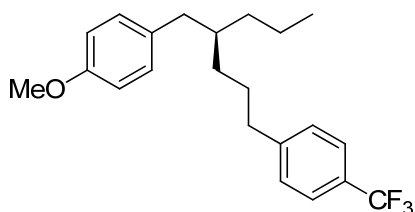

**(S)-1-methoxy-4-(2-propyl-5-(4-(trifluoromethyl)phenyl)pentyl)benzene**

82%; Colorless oil;  $[\alpha]_D^{25} + 8.6$  (*c* 1.0, CHCl<sub>3</sub>, 95% ee); IR (neat) 3031, 3018, 1457, 709; <sup>1</sup>H NMR (CDCl<sub>3</sub>, 400 MHz): δ 7.48-6.75 (m, 8H), 3.75 (s, 3H), 2.58-2.35 (m, 4H), 1.61-1.17 (m, 9H), 0.84 (t, *J* = 6.8 Hz, 3H); <sup>13</sup>C NMR (CDCl<sub>3</sub>, 100 MHz): δ 157.7, 146.9, 133.5, 130.0, 128.7, 127.8, 125.2 (q, *J* = 3.7 Hz), 113.5, 55.3, 55.2, 39.4, 36.0, 35.5, 32.5, 28.2, 19.8, 14.4; <sup>19</sup>F NMR (CDCl<sub>3</sub>, 188 MHz): δ -65.5; HRMS (APCI) calcd for C<sub>22</sub>H<sub>27</sub>OF<sub>3</sub> [M]<sup>+</sup>: 364.2014; found: 364.2037. HPLC (Daicel Chiralcel OD-H, *i*-PrOH/hexane = 0/100, 1.0 mL/min, 190 nm) t<sub>1</sub> = 24.3 min (minor), t<sub>2</sub> = 30.9 min (major).

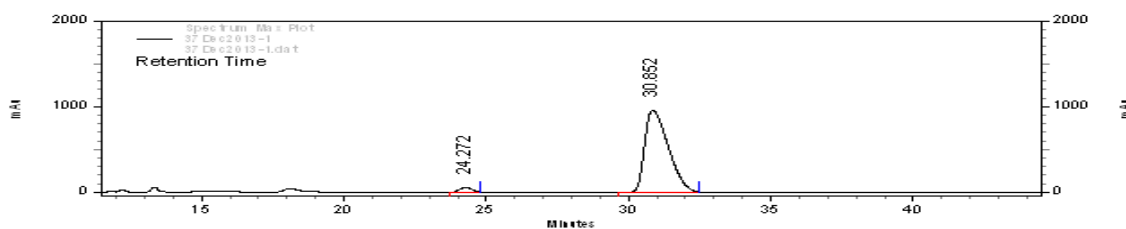

| Retention Time | Area     | Area Percent | Height  |
|----------------|----------|--------------|---------|
| 24.272         | 1496687  | 2.677        | 52130   |
| 30.852         | 54413412 | 97.323       | 953369  |
| Totals         | 55910099 | 100.000      | 1005499 |

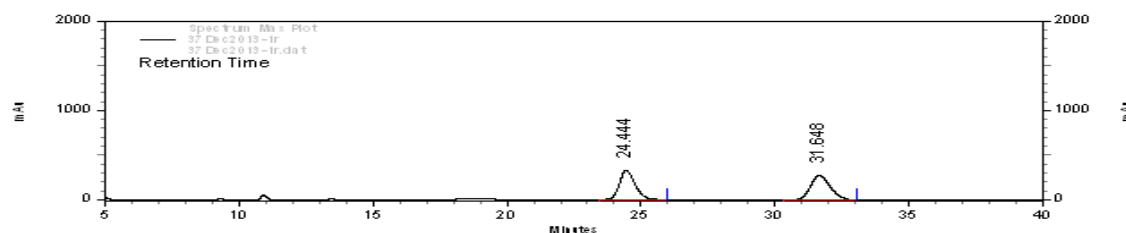

| Retention Time | Area     | Area Percent | Height |
|----------------|----------|--------------|--------|
| 24.444         | 12967234 | 49.364       | 321676 |
| 31.648         | 13301378 | 50.636       | 266340 |
| Totals         | 26268612 | 100.000      | 588016 |

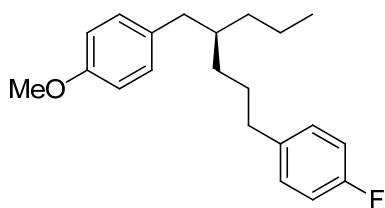

**(S)-1-fluoro-4-(4-(4-methoxybenzyl)heptyl)benzene**

85%; Colorless oil;  $[\alpha]_D^{25} + 3.1$  ( $c$  1.0,  $\text{CHCl}_3$ , 94% ee); IR (neat) 3040, 3021, 1462, 723;  $^1\text{H}$  NMR ( $\text{CDCl}_3$ , 400 MHz):  $\delta$  7.06-6.76 (m, 8H), 3.76 (s, 3H), 2.48-2.39 (m, 4H), 1.61-1.15 (m, 9H), 0.84 (t,  $J = 6.8$  Hz, 3H);  $^{13}\text{C}$  NMR ( $\text{CDCl}_3$ , 100 MHz):  $\delta$  162.6 (d,  $J = 380.1$  Hz), 138.3, 133.5, 129.9, 129.6 (d,  $J = 7.7$  Hz), 114.9 (d,  $J = 20.9$  Hz), 113.4, 55.1, 39.4, 39.3, 35.4, 35.3, 32.4, 28.5, 19.6, 14.3;  $^{19}\text{F}$  NMR ( $\text{CDCl}_3$ , 188 MHz):  $\delta$  -121.4; HRMS (APCI) calcd for  $\text{C}_{21}\text{H}_{27}\text{FO}$   $[\text{M}]^+$ : 314.2040; found: 314.2034; HPLC (Daicel Chiralcel OJ-H, *i*-PrOH/hexane = 1/99, 1.0 mL/min, 190 nm)  $t_1 = 25.9$  min (minor),  $t_2 = 27.6$  min (major).

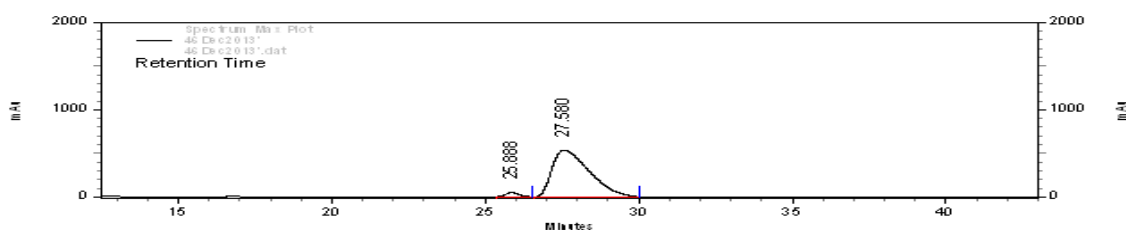

| Retention Time | Area     | Area Percent | Height |
|----------------|----------|--------------|--------|
| 25.888         | 1435957  | 3.106        | 48041  |
| 27.580         | 44799732 | 96.894       | 532145 |
| Totals         | 46235689 | 100.000      | 580186 |

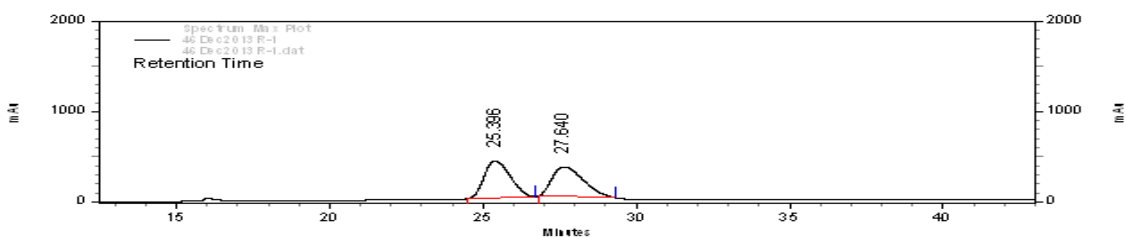

| Retention Time | Area     | Area Percent | Height |
|----------------|----------|--------------|--------|
| 25.396         | 23961701 | 50.586       | 405245 |
| 27.640         | 23406756 | 49.414       | 329244 |
| Totals         | 47368457 | 100.000      | 734489 |



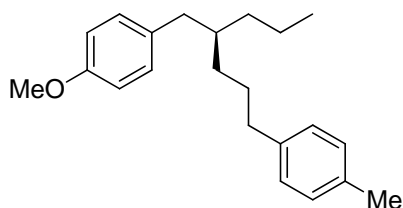

**(S)-1-methoxy-4-(2-propyl-5-(p-tolyl)pentyl)benzene**

86%; Colorless oil;  $[\alpha]_D^{25} + 10.1$  ( $c$  1.0,  $\text{CHCl}_3$ , 92% ee); IR (neat) 3043, 3017, 1459, 711;  $^1\text{H}$  NMR ( $\text{CDCl}_3$ , 400 MHz):  $\delta$  7.05-6.76 (m, 8H), 3.76 (s, 3H), 2.49-2.41 (m, 4H), 2.29 (s, 3H), 1.55-1.16 (m, 9H), 0.83 (t,  $J = 6.8$  Hz, 3H);  $^{13}\text{C}$  NMR ( $\text{CDCl}_3$ , 100 MHz):  $\delta$  157.6, 139.9, 134.9, 133.8, 129.9, 128.8, 128.1, 113.4, 55.1, 39.4, 35.7, 35.3, 32.6, 28.6, 20.9, 19.6, 14.3; HRMS (APCI) calcd for  $\text{C}_{22}\text{H}_{30}\text{O}$   $[\text{M}]^+$ : 310.2291; found: 310.2278; HPLC (Daicel Chiralcel OD-H, *i*-PrOH/hexane = 1/99, 1.0 mL/min, 190 nm)  $t_1 = 5.9$  min (minor),  $t_2 = 7.4$  min (major).

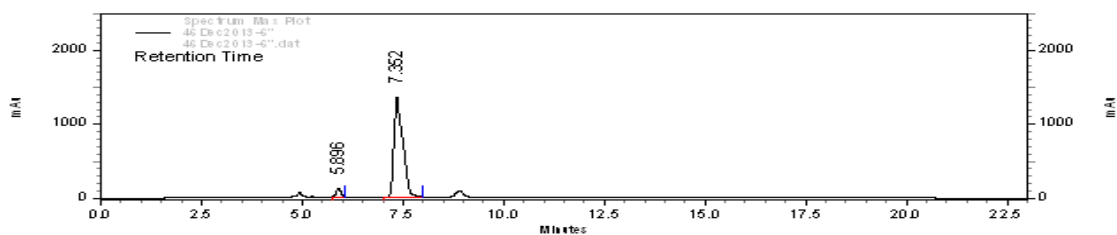

| Spectrum Max Plot Results |          |              |         |         |
|---------------------------|----------|--------------|---------|---------|
| Retention Time            | Area     | Area Percent | Height  |         |
| 5.896                     | 888981   | 4.140        | 112674  | 7.712   |
| 7.352                     | 20582338 | 95.860       | 1348361 | 92.288  |
| Totals                    | 21471319 | 100.000      | 1461035 | 100.000 |

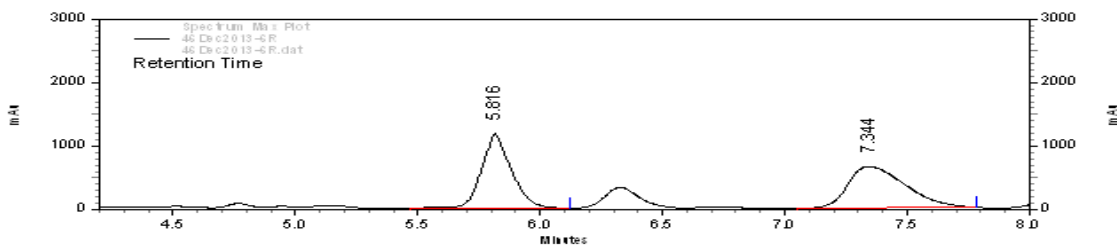

| Spectrum Max Plot Results |          |              |         |         |
|---------------------------|----------|--------------|---------|---------|
| Retention Time            | Area     | Area Percent | Height  |         |
| 5.816                     | 9924809  | 48.291       | 1171455 | 64.147  |
| 7.344                     | 10627128 | 51.709       | 654759  | 35.853  |
| Totals                    | 20551937 | 100.000      | 1826214 | 100.000 |

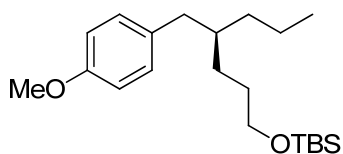

**(S)-tert-butyl((4-(4-methoxybenzyl)heptyl)oxy)dimethylsilane**

80%; Colorless oil;  $[\alpha]_D^{25} + 9.4$  (c 1.0, CHCl<sub>3</sub>, 81% ee); IR (neat) 3020, 3007, 1458, 708; <sup>1</sup>H NMR (CDCl<sub>3</sub>, 400 MHz): δ 7.08-6.80 (m, 4H), 3.80 (s, 3H), 3.60 (t, *J* = 6.0 Hz, 2H), 2.50-2.47 (m, 2H), 1.63-1.21 (m, 9H), 0.89-0.84 (m, 12H), 0 (s, 6H); <sup>13</sup>C NMR (CDCl<sub>3</sub>, 100 MHz): δ 157.6, 133.7, 130.0, 113.5, 63.6, 55.2, 39.5, 39.4, 35.4, 29.9, 29.8, 26.0, 19.7, 14.4, -5.3; HRMS (APCI) calcd for C<sub>21</sub>H<sub>39</sub>O<sub>2</sub>Si [M+1]<sup>+</sup>: 351.2719; found: 351.2750; HPLC (Daicel Chiralcel OD-H, *i*-PrOH/hexane = 0/100, 1.0 mL/min, 190 nm) t<sub>1</sub> = 12.3 min (minor), t<sub>2</sub> = 15.2 min (major).

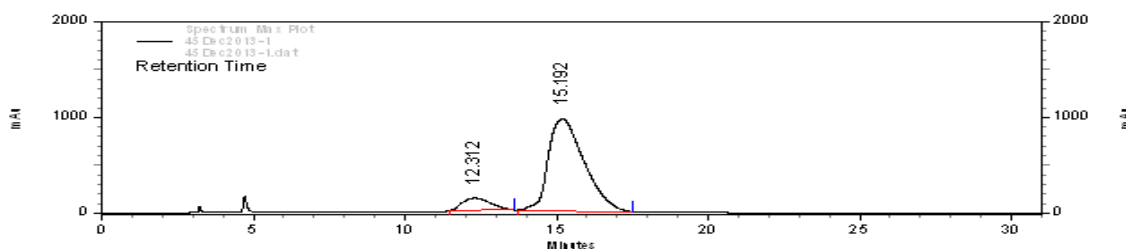

| Retention Time | Area     | Area Percent | Height  |         |
|----------------|----------|--------------|---------|---------|
| 12.312         | 8380830  | 9.638        | 128368  | 11.817  |
| 15.192         | 78574063 | 90.362       | 957942  | 88.183  |
| Totals         | 86954893 | 100.000      | 1086310 | 100.000 |

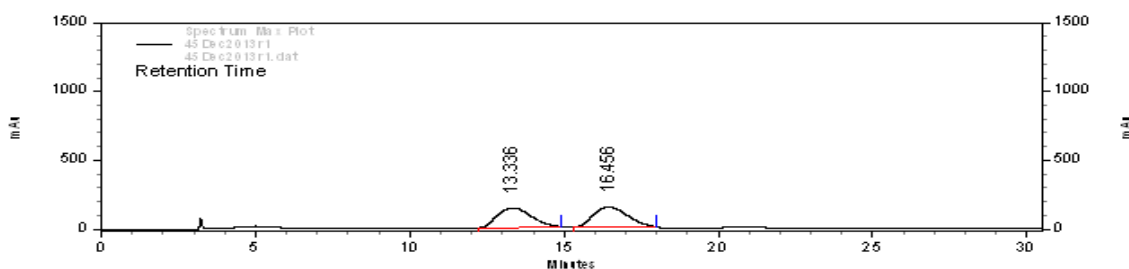

| Retention Time | Area     | Area Percent | Height |         |
|----------------|----------|--------------|--------|---------|
| 13.336         | 10807591 | 48.723       | 140712 | 48.984  |
| 16.456         | 11373924 | 51.277       | 146550 | 51.016  |
| Totals         | 22181515 | 100.000      | 287262 | 100.000 |

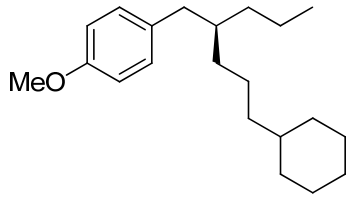

**(S)-1-(5-cyclohexyl-2-propylpentyl)-4-methoxybenzene**

84%; Colorless oil;  $[\alpha]_D^{25} + 3.9$  (c 1.0, CHCl<sub>3</sub>, 78% ee); IR (neat) 3029, 3011, 1462, 705; <sup>1</sup>H NMR (CDCl<sub>3</sub>, 400 MHz): δ 7.02-6.77 (m, 4H), 3.80 (s, 3H), 2.43-2.40 (m, 2H), 1.65-1.29 (m, 6H), 1.10-1.05 (m, 14H), 0.84-0.80 (m, 5H); <sup>13</sup>C NMR (CDCl<sub>3</sub>, 100 MHz): 157.6, 133.9, 130.0, 113.5, 55.3, 55.1, 39.6, 37.9, 37.6, 35.5, 33.5, 33.4, 26.8, 26.5, 23.7, 19.8, 14.5; HRMS (APCI) calcd for C<sub>21</sub>H<sub>34</sub>O [M]<sup>+</sup>: 302.2604; found: 302.2589; HPLC (Daicel Chiralcel OD-H, *i*-PrOH/hexane = 0/100, 1.0 mL/min, 190 nm) t<sub>1</sub> = 9.6 min (minor), t<sub>2</sub> = 10.7 min (major).

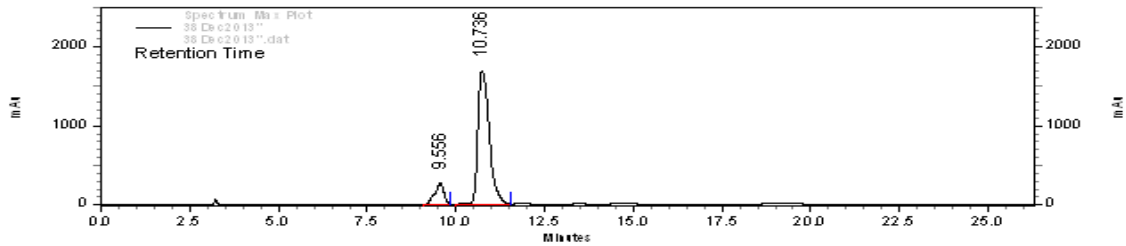

| Spectrum Max Plot Results |                 |                |                |                |
|---------------------------|-----------------|----------------|----------------|----------------|
| Retention Time            | Area            | Area Percent   | Height         |                |
| 9.556                     | 4677062         | 10.995         | 262943         | 13.457         |
| 10.736                    | 37859173        | 89.005         | 1690977        | 86.543         |
| <b>Totals</b>             | <b>42536235</b> | <b>100.000</b> | <b>1953920</b> | <b>100.000</b> |

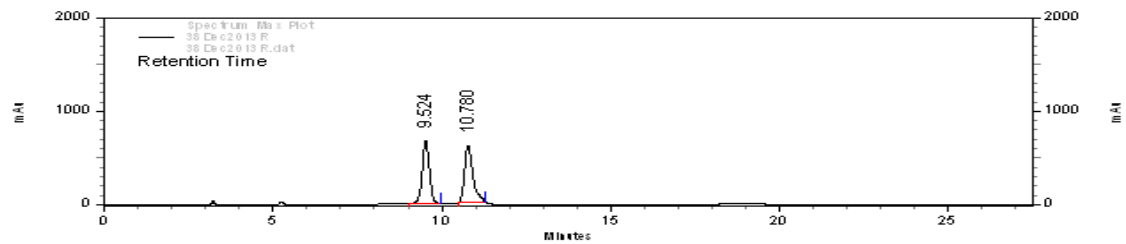

| Spectrum Max Plot Results |                 |                |                |                |
|---------------------------|-----------------|----------------|----------------|----------------|
| Retention Time            | Area            | Area Percent   | Height         |                |
| 9.524                     | 9975756         | 48.503         | 668591         | 52.278         |
| 10.780                    | 10591708        | 51.497         | 610321         | 47.722         |
| <b>Totals</b>             | <b>20567464</b> | <b>100.000</b> | <b>1278912</b> | <b>100.000</b> |

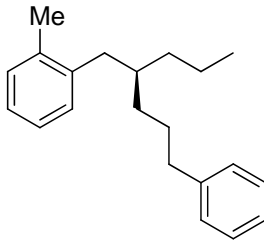

**(S)-1-methyl-2-(5-phenyl-2-propylpentyl)benzene**

78%; Colorless oil;  $[\alpha]_D^{25} + 9.8$  ( $c$  1.0,  $\text{CHCl}_3$ , 87% ee); IR (neat) 3046, 3013, 1452, 978, 709;  $^1\text{H}$  NMR ( $\text{CDCl}_3$ , 400 MHz):  $\delta$  7.27-7.01 (m, 9H), 2.61-2.49 (m, 3H), 2.27, (s, 3H), 1.68-1.47-1.26 (m, 10H), 0.87 (t,  $J = 6.4$  Hz, 3H);  $^{13}\text{C}$  NMR ( $\text{CDCl}_3$ , 100 MHz):  $\delta$  142.8, 139.9, 136.2, 130.2, 130.1, 128.4, 128.2, 125.7, 125.6, 38.1, 38.0, 36.6, 35.8, 33.1, 28.6, 19.7, 14.5; HPLC (Daicel Chiralcel OD-H,  $i$ -PrOH/hexane = 0/100, 1.0 mL/min, 190 nm)  $t_1 = 12.6$  min (minor),  $t_2 = 13.8$  min (major).

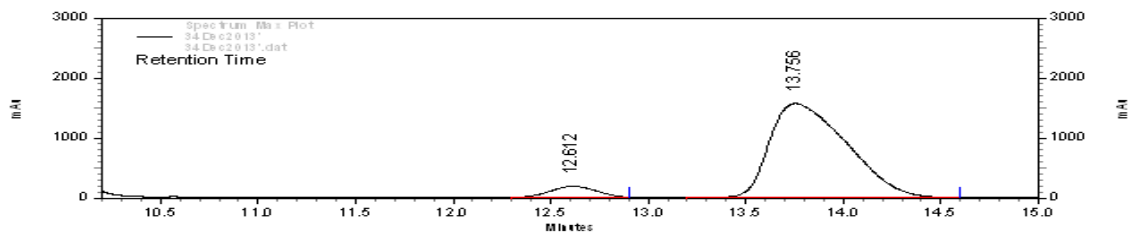

| Retention Time | Area      | Area Percent | Height  |         |
|----------------|-----------|--------------|---------|---------|
| 12.612         | 297582.7  | 6.464        | 181680  | 10.377  |
| 13.756         | 4305858.3 | 93.536       | 1569031 | 89.623  |
| Totals         | 46034410  | 100.000      | 1750711 | 100.000 |

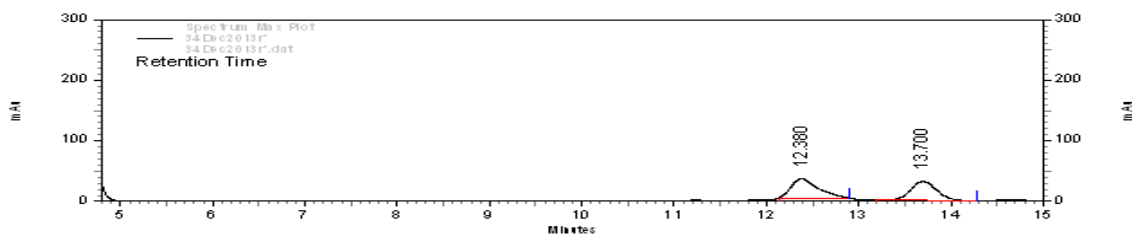

| Retention Time | Area    | Area Percent | Height |         |
|----------------|---------|--------------|--------|---------|
| 12.380         | 654158  | 51.818       | 31572  | 50.412  |
| 13.700         | 608247  | 48.182       | 31056  | 49.588  |
| Totals         | 1262405 | 100.000      | 62628  | 100.000 |

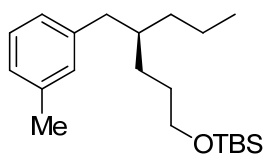

**(S)-tert-butyl dimethyl((4-(3-methylbenzyl)heptyl)oxy)silane**

84%; Colorless oil;  $[\alpha]_D^{25} + 5.7$  (c 1.0, CHCl<sub>3</sub>, 80% ee); IR (neat) 3037, 3019, 1448, 1415, 708; <sup>1</sup>H NMR (CDCl<sub>3</sub>, 400 MHz): δ 7.14-6.90 (m, 4H), 3.54 (t, *J* = 6.8 Hz, 2H), 2.48 (t, *J* = 6.8 Hz, 2H), 2.29 (s, 3H), 1.64-1.30 (m, 9H), 1.19-0.84 (m, 12H), 0 (s, 6H); <sup>13</sup>C NMR (CDCl<sub>3</sub>, 100 MHz): δ 140.1, 131.3, 130.5, 128.2, 63.5, 39.8, 35.4, 29.8, 28.9, 26.0, 18.4, 14.4, -5.2; HPLC (Daicel Chiralcel OD-H, *i*-PrOH/hexane = 0/100, 1.0 mL/min, 190 nm) t<sub>1</sub> = 5.3 min (minor), t<sub>2</sub> = 5.9 min (major).

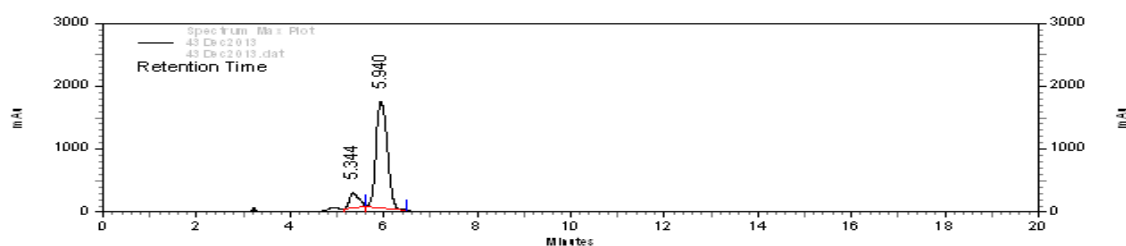

| Spectrum Max Plot Results |                 |                |                |                |
|---------------------------|-----------------|----------------|----------------|----------------|
| Retention Time            | Area            | Area Percent   | Height         |                |
| 5.344                     | 3182253         | 10.191         | 236108         | 12.350         |
| 5.940                     | 28044414        | 89.809         | 1675773        | 87.650         |
| <b>Totals</b>             | <b>31226667</b> | <b>100.000</b> | <b>1911881</b> | <b>100.000</b> |

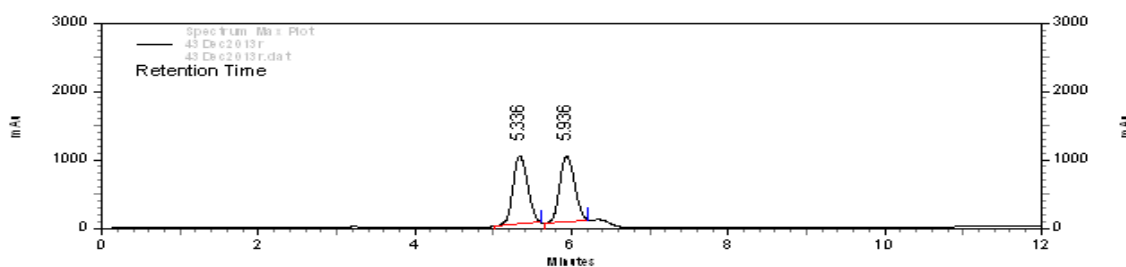

| Spectrum Max Plot Results |                 |                |                |                |
|---------------------------|-----------------|----------------|----------------|----------------|
| Retention Time            | Area            | Area Percent   | Height         |                |
| 5.336                     | 12995113        | 50.494         | 996087         | 50.924         |
| 5.936                     | 12740632        | 49.506         | 959956         | 49.076         |
| <b>Totals</b>             | <b>25735745</b> | <b>100.000</b> | <b>1956043</b> | <b>100.000</b> |

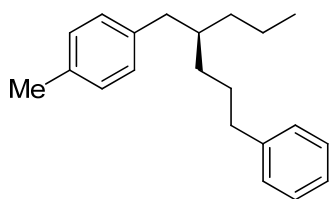

**(S)-1-methyl-4-(5-phenyl-2-propylpentyl)benzene**

86%; Colorless oil;  $[\alpha]_D^{25} + 8.2$  (*c* 1.0, CHCl<sub>3</sub>, 78% ee); IR (neat) 3056, 3014, 1456, 989, 794; <sup>1</sup>H NMR (CDCl<sub>3</sub>, 300 MHz): δ 7.29-6.99 (m, 9H), 2.57-2.46 (m, 4H), 2.32, (s, 3H), 1.68-1.23 (m, 9H), 0.87 (t, *J* = 6.4 Hz, 3H); <sup>13</sup>C NMR (CDCl<sub>3</sub>, 75 MHz): δ 142.8, 138.4, 134.2, 128.9, 128.7, 128.3, 128.1, 125.5, 39.9, 39.3, 36.2, 35.4, 32.7, 28.5, 20.9, 19.6, 14.3; HRMS (APCI) calcd for C<sub>21</sub>H<sub>29</sub> [M+1]<sup>+</sup>: 281.2269; found: 281.2268; HPLC (Daicel Chiralcel OD-H, *i*-PrOH/hexane = 0/100, 1.0 mL/min, 190 nm) t<sub>1</sub> = 11.5 min (minor), t<sub>2</sub> = 14.3 min (major).

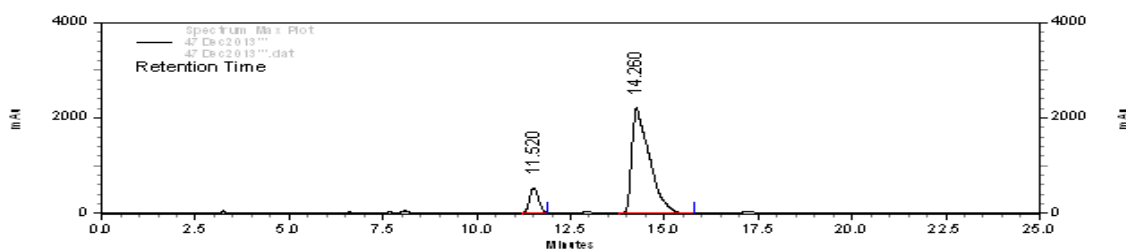

| Retention Time | Area            | Area Percent   | Height         |
|----------------|-----------------|----------------|----------------|
| 11.520         | 8741593         | 10.887         | 530765         |
| 14.260         | 71551465        | 89.113         | 2207285        |
| <b>Totals</b>  | <b>80293058</b> | <b>100.000</b> | <b>2738050</b> |

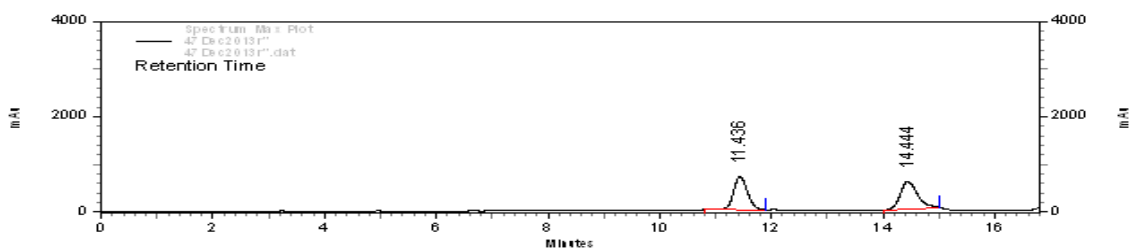

| Retention Time | Area            | Area Percent   | Height         |
|----------------|-----------------|----------------|----------------|
| 11.436         | 11784640        | 49.315         | 691236         |
| 14.444         | 12111811        | 50.685         | 570537         |
| <b>Totals</b>  | <b>23896451</b> | <b>100.000</b> | <b>1261773</b> |

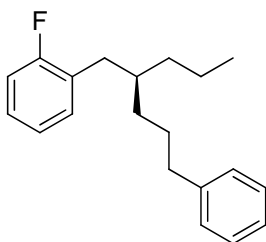

**(S)-1-fluoro-2-(5-phenyl-2-propylpentyl)benzene**

83%; Colorless oil;  $[\alpha]_D^{25}$  -3.5 (*c* 1.0, CHCl<sub>3</sub>, 72% ee); IR (neat) 3031, 3011, 1441, 793; <sup>1</sup>H NMR (CDCl<sub>3</sub>, 200 MHz): δ 7.32-6.96 (m, 9H), 2.60-2.53 (m, 4H), 1.73-1.27 (m, 9H), 0.90 (t, *J* = 6.0 Hz, 3H); <sup>13</sup>C NMR (CDCl<sub>3</sub>, 75 MHz): δ 131.4, 128.3(*d*, *J* = 11.3 Hz), 127.2 (*d*, *J* = 8.1 Hz), 125.4, 123.5, 115.2 (*d*, *J* = 23.3 Hz), 38.2, 36.1, 35.5, 33.5, 32.8, 28.3, 19.5, 14.3; <sup>19</sup>F NMR (CDCl<sub>3</sub>, 188 MHz): δ -121.6; HRMS (APCI) calcd for C<sub>20</sub>H<sub>26</sub>F [M+1]<sup>+</sup>: 285.2019; found: 285.2009; HPLC (Daicel Chiralcel OJ-H, *i*-PrOH/hexane = 4/96, 1.0 mL/min, 190 nm) t<sub>1</sub> = 4.3 min (minor), t<sub>2</sub> = 5.6 min (major).

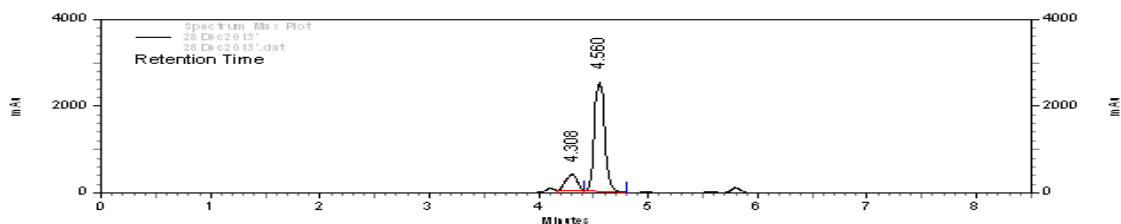

| Spectrum Max Plot Results |                 |                |                |                |
|---------------------------|-----------------|----------------|----------------|----------------|
| Retention Time            | Area            | Area Percent   | Height         |                |
| 4.308                     | 2625446         | 13.801         | 364344         | 12.619         |
| 4.560                     | 16397801        | 86.199         | 2522831        | 87.381         |
| <b>Totals</b>             | <b>19023247</b> | <b>100.000</b> | <b>2887175</b> | <b>100.000</b> |

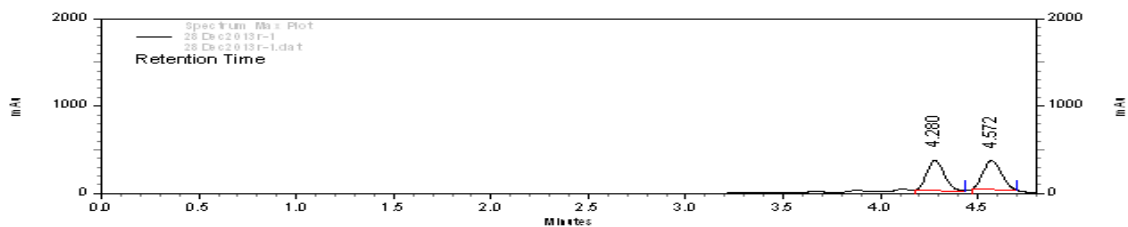

| Spectrum Max Plot Results |                |                |               |                |
|---------------------------|----------------|----------------|---------------|----------------|
| Retention Time            | Area           | Area Percent   | Height        |                |
| 4.280                     | 2097213        | 48.762         | 343067        | 50.682         |
| 4.572                     | 2203700        | 51.238         | 333838        | 49.318         |
| <b>Totals</b>             | <b>4300913</b> | <b>100.000</b> | <b>676905</b> | <b>100.000</b> |

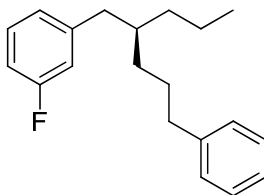

**(S)-1-fluoro-3-(5-phenyl-2-propylpentyl)benzene**

80%; Colorless oil;  $[\alpha]_D^{25} + 3.0$  (c 1.0, CHCl<sub>3</sub>, 82% ee); IR (neat) 3028, 3009, 1492, 786; <sup>1</sup>H NMR (CDCl<sub>3</sub>, 200 MHz): δ 7.28-6.82 (m, 9H), 2.57-2.43 (m, 4H), 1.70-1.25 (m, 9H), 0.90 (t, *J* = 6.0 Hz, 3H); <sup>13</sup>C NMR (CDCl<sub>3</sub>, 75 MHz): δ 129.5 (d, *J* = 10 Hz), 128.4 (d, *J* = 5.1 Hz), 125.6, 124.9, 116.1 (d, *J* = 20.3 Hz), 112.7 (d, *J* = 25.0 Hz), 40.4, 39.3, 36.2, 35.4, 32.7, 28.5, 19.7, 14.4; <sup>19</sup>F NMR (CDCl<sub>3</sub>, 188 MHz): δ -117.4; HRMS (APCI) calcd for C<sub>20</sub>H<sub>26</sub>F [M+1]<sup>+</sup>: 285.2019; found: 285.2020; HPLC (Daicel Chiralcel OD-H, *i*-PrOH/hexane = 0/100, 1.0 mL/min, 190 nm) t<sub>1</sub> = 14.3 min (minor), t<sub>2</sub> = 14.9 min (major).

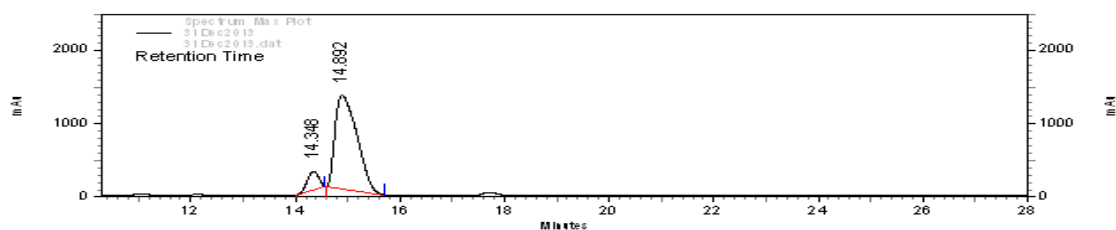

| Retention Time | Area     | Area Percent | Height  |
|----------------|----------|--------------|---------|
| 14.348         | 3787793  | 9.151        | 249020  |
| 14.892         | 37604913 | 90.849       | 1286264 |
| Totals         | 41392706 | 100.000      | 1535284 |

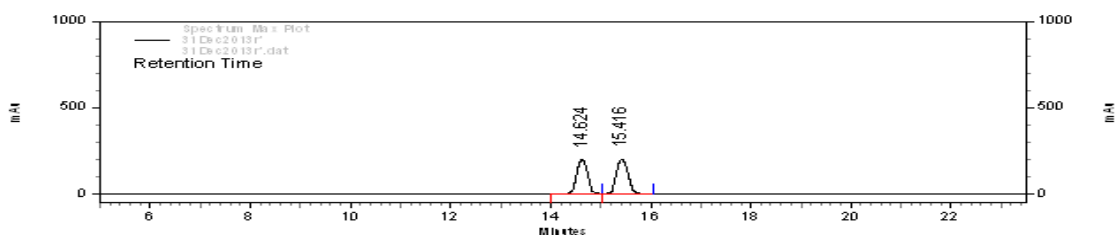

| Retention Time | Area    | Area Percent | Height |
|----------------|---------|--------------|--------|
| 14.624         | 3049876 | 48.071       | 197419 |
| 15.416         | 3294635 | 51.929       | 198428 |
| Totals         | 6344511 | 100.000      | 395847 |



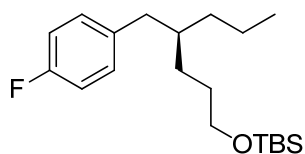

**(S)-tert-butyl((4-(4-fluorobenzyl)heptyl)oxy)dimethylsilane**

79%; Colorless oil;  $[\alpha]_D^{25}$  - 5.6 (*c* 1.0, CHCl<sub>3</sub>, 38% ee); IR (neat) 3021, 3018, 1487, 704; <sup>1</sup>H NMR (CDCl<sub>3</sub>, 200 MHz): δ 7.13-6.91 (m, 4H), 3.59 (t, *J* = 6.0 Hz, 2H), 2.53-2.49 (m, 2H), 1.64-1.24 (m, 9H), 0.92 (m, 12H), 0 (s, 6H); <sup>13</sup>C NMR (CDCl<sub>3</sub>, 50 MHz): δ 130.4 (d, *J* = 7.7 Hz), 115.0 (d, *J* = 20.8 Hz), 63.6, 39.7, 39.3, 35.4, 29.8, 29.0, 25.9, 19.7, 14.3, -5.2; <sup>19</sup>F NMR (CDCl<sub>3</sub>, 188 MHz): δ -121.5; HRMS (APCI) calcd for C<sub>20</sub>H<sub>36</sub>FOSi [M+1]<sup>+</sup>: 339.2514; found: 339.2507. HPLC (Daicel Chiralcel OD-H, *i*-PrOH/hexane = 0.1/99.9, 1.0 mL/min, 190 nm) t<sub>1</sub> = 4.4 min (minor), t<sub>2</sub> = 4.9 min (major).

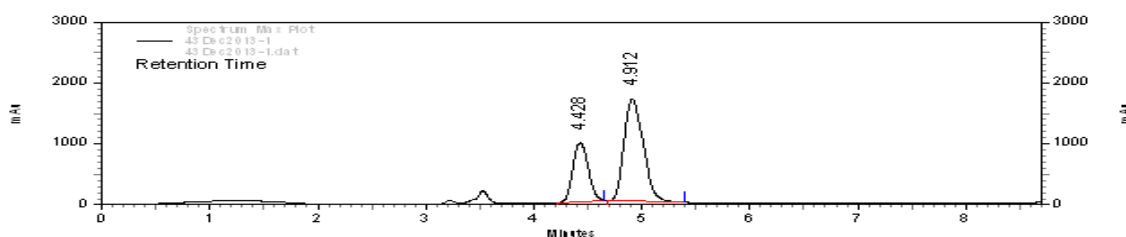

| Retention Time | Area     | Area Percent | Height  |
|----------------|----------|--------------|---------|
| 4.428          | 9524812  | 31.243       | 963420  |
| 4.912          | 20961140 | 68.757       | 1683248 |
| Totals         | 30485952 | 100.000      | 2646668 |

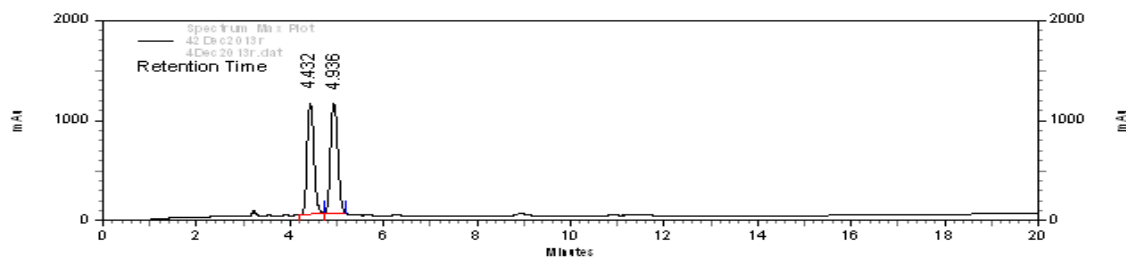

| Retention Time | Area     | Area Percent | Height  |
|----------------|----------|--------------|---------|
| 4.432          | 11194952 | 48.774       | 1103869 |
| 4.936          | 11757519 | 51.226       | 1089071 |
| Totals         | 22952471 | 100.000      | 2192940 |

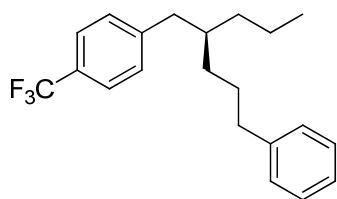

**(S)-1-(5-phenyl-2-propylpentyl)-4-(trifluoromethyl)benzene**

81%; Colorless oil;  $[\alpha]_D^{25}$  -20.2 (*c* 1.0, CHCl<sub>3</sub>, 89% ee); IR (neat) 3065, 3010, 1498, 766; <sup>1</sup>H NMR (CDCl<sub>3</sub>, 300 MHz): δ 7.55-7.10 (m, 9H), 2.57-2.51 (m, 4H), 1.69-1.20 (m, 9H), 0.86 (t, *J* = 7.2 Hz, 3H); <sup>13</sup>C NMR (CDCl<sub>3</sub>, 75 MHz): δ 145.7, 142.4, 136.4, 129.4 (d, *J* = 10.9 Hz), 128.2 (d, *J* = 7.3 Hz), 126.0, 124.9 (q, *J* = 3.7 Hz), 40.2, 39.2, 36.0, 35.3, 32.4, 28.3, 19.5, 14.2; <sup>19</sup>F NMR (CDCl<sub>3</sub>, 188 MHz): δ -65.5; HRMS (APCI) calcd for C<sub>21</sub>H<sub>25</sub>F<sub>3</sub> [M]<sup>+</sup>: 334.1908; found: 334.1926. HPLC (Daicel Chiralcel OD-H, *i*-PrOH/hexane = 0/100, 1.0 mL/min, 190 nm) t<sub>1</sub> = 9.0 min (minor), t<sub>2</sub> = 11.0 min (major).

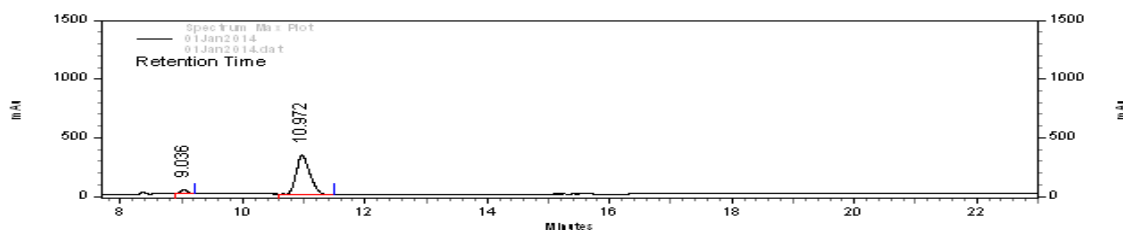

| Retention Time | Area    | Area Percent | Height |
|----------------|---------|--------------|--------|
| 9.036          | 303647  | 5.732        | 33566  |
| 10.972         | 4993843 | 94.268       | 331632 |
| Totals         | 5297490 | 100.000      | 365198 |

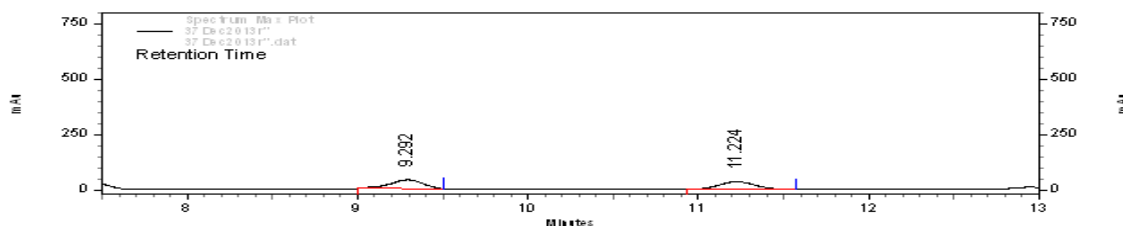

| Retention Time | Area    | Area Percent | Height |
|----------------|---------|--------------|--------|
| 9.292          | 539726  | 51.454       | 39415  |
| 11.224         | 509229  | 48.546       | 34169  |
| Totals         | 1048955 | 100.000      | 73584  |

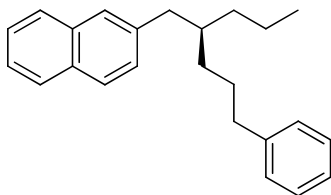

**(S)-2-(5-phenyl-2-propylpentyl)naphthalene**

58%; Yellow oil;  $[\alpha]_D^{25} + 7.8$  (c 1.0, CHCl<sub>3</sub>, 71% ee); IR (neat) 3065, 3010, 1498, 766; <sup>1</sup>H NMR (CDCl<sub>3</sub>, 200 MHz): δ 7.85-7.14 (m, 12H), 2.73-2.54 (m, 4H), 1.83-1.32 (m, 9H), 0.91 (t, *J* = 6.0 Hz, 3H); <sup>13</sup>C NMR (CDCl<sub>3</sub>, 50 MHz): δ 142.8, 139.3, 133.5, 131.9, 128.4, 128.2, 128.0, 127.6, 127.4, 127.3, 125.8, 125.6, 125.0, 40.7, 39.4, 36.3, 35.6, 32.9, 28.6, 19.8, 14.5; HRMS (APCI) calcd for C<sub>24</sub>H<sub>28</sub> [M]<sup>+</sup>: 316.2191; found: 316.2166; HPLC (Daicel Chiralcel OD-H, *i*-PrOH/hexane = 4/96, 1.0 mL/min, 190 nm) t<sub>1</sub> = 5.0 min (minor), t<sub>2</sub> = 6.8 min (major).

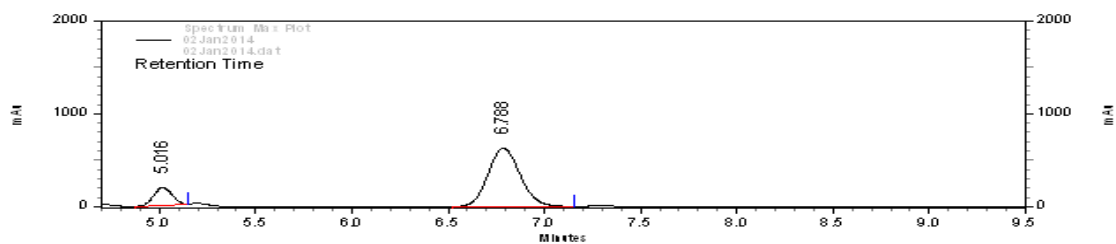

| Retention Time | Area    | Area Percent | Height |
|----------------|---------|--------------|--------|
| 5.016          | 1234119 | 14.541       | 188269 |
| 6.788          | 7252974 | 85.459       | 625023 |
| Totals         | 8487093 | 100.000      | 813292 |

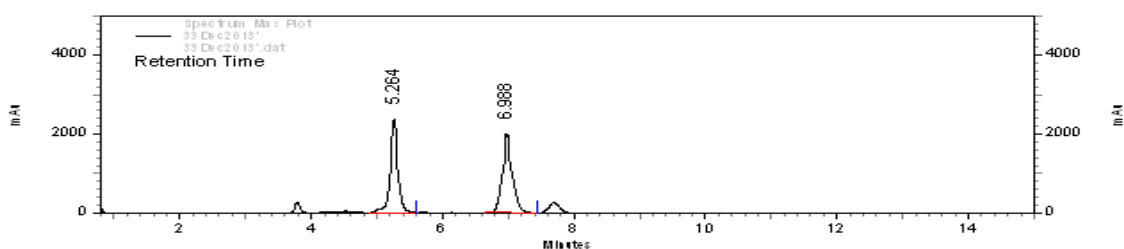

| Retention Time | Area     | Area Percent | Height  |
|----------------|----------|--------------|---------|
| 5.264          | 18870726 | 48.232       | 2377895 |
| 6.988          | 20254033 | 51.768       | 2004106 |
| Totals         | 39124759 | 100.000      | 4382001 |

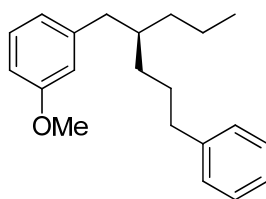

**(S)-1-methoxy-3-(5-phenyl-2-propylpentyl)benzene**

78%; Colorless oil;  $[\alpha]_D^{25} + 4.4$  ( $c$  1.0,  $\text{CHCl}_3$ , 88% ee); IR (neat) 3045, 3020, 1457, 792;  $^1\text{H}$  NMR ( $\text{CDCl}_3$ , 300 MHz):  $\delta$  7.27-6.6 (m, 9H), 3.76 (s, 3H), 2.53-2.50 (m, 4H), 1.80-1.24 (m, 9H), 0.89 (t,  $J = 6.0$  Hz, 3H);  $^{13}\text{C}$  NMR ( $\text{CDCl}_3$ , 50 MHz):  $\delta$  157.8, 140.3, 129.8, 128.3, 128.1, 125.5, 116.9, 112.3, 55.3, 38.5, 37.4, 36.1, 35.5, 32.8, 28.4, 19.5, 14.3; HRMS (APCI) calcd for  $\text{C}_{21}\text{H}_{29}\text{O}$   $[\text{M}+1]^+$ : 297.2218; found: 297.2210. HPLC (Daicel Chiralcel OD-H,  $i$ -PrOH/hexane = 0/100, 1.0 mL/min, 190 nm)  $t_1 = 29.6$  min (minor),  $t_2 = 30.9$  min (major).

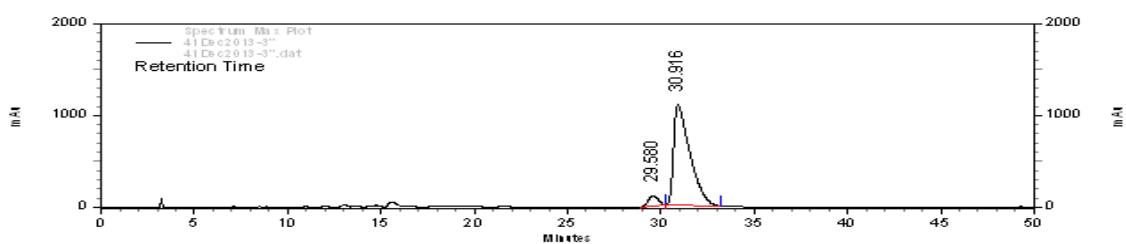

| Retention Time | Area     | Area Percent | Height  |         |
|----------------|----------|--------------|---------|---------|
| 29.580         | 4228575  | 5.983        | 114326  | 9.467   |
| 30.916         | 6645318  | 94.017       | 1093342 | 90.533  |
| Totals         | 70681893 | 100.000      | 1207668 | 100.000 |

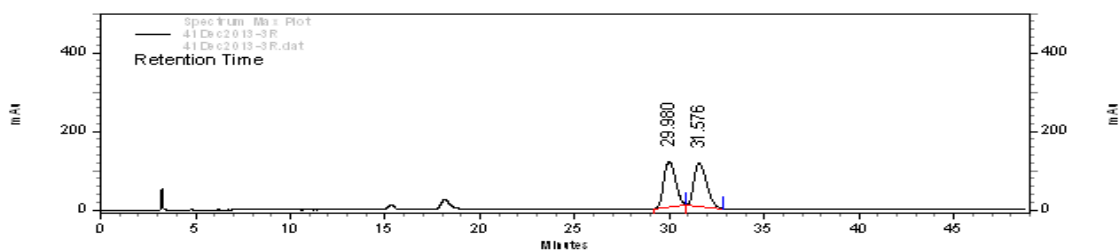

| Retention Time | Area    | Area Percent | Height |         |
|----------------|---------|--------------|--------|---------|
| 29.980         | 4896767 | 49.593       | 116079 | 51.515  |
| 31.576         | 4977156 | 50.407       | 109251 | 48.485  |
| Totals         | 9873923 | 100.000      | 225330 | 100.000 |

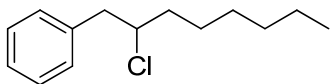

### (2-chlorooctyl)benzene

90%; Colorless oil; IR (neat) 3019, 1416, 783, 405;  $^1\text{H}$  NMR ( $\text{CDCl}_3$ , 300 MHz):  $\delta$  7.19-7.13 (m, 5H), 4.35-4.20 (m, 1H), 3.36-3.12 (m, 2H), 1.81-1.55 (m, 3H), 1.40-1.25 (m, 7H), 0.88 (t,  $J = 6.8$  Hz 3H);  $^{13}\text{C}$  NMR ( $\text{CDCl}_3$ , 100 MHz): 139.7, 128.9, 128.3, 126.6, 47.4, 39.4, 38.9, 31.5, 29.5, 28.3, 22.5, 13.9; HRMS (APCI) calcd for  $\text{C}_{14}\text{H}_{21} [\text{M}-\text{Cl}]^+$ : 189.1643; found: 189.1628; HPLC (Daicel Chiralcel OD-H, *i*-PrOH/hexane = 0.2/99.8, 1.0 mL/min, 190 nm)  $t_1 = 7.3$  min,  $t_2 = 7.7$  min (racemic).

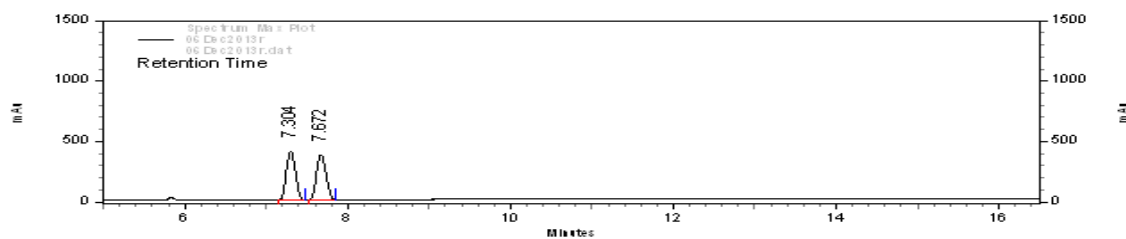

| Retention Time | Area     | Area Percent | Height  |         |
|----------------|----------|--------------|---------|---------|
| 7.304          | 3073.510 | 50.633       | 3992.78 | 52.028  |
| 7.672          | 2996.657 | 49.367       | 3681.50 | 47.972  |
| Totals         | 6070.167 | 100.000      | 7674.28 | 100.000 |

### References

- Kulbitski, K., Nisnevich, G. & Gandelman, M. Metal-free efficient, general and facile iododecarboxylation method with biodegradable co-products. *Adv. Synth. Catal.* **353**, 1438-1442 (2011).
- Saito, B. & Fu, G. C. Enantioselective alkyl-alkyl Suzuki cross-couplings of unactivated homobenzylic halides. *J. Am. Chem. Soc.* **130**, 6694-6695 (2008).

$^1\text{H}/^{13}\text{C}/^{19}\text{F}$  Spectra

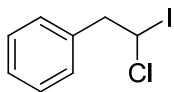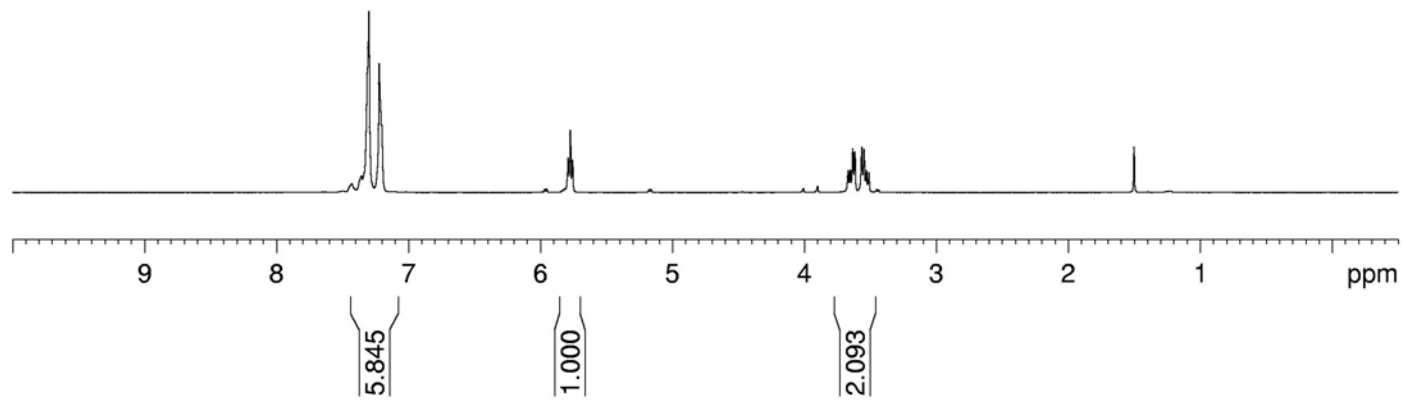

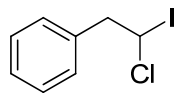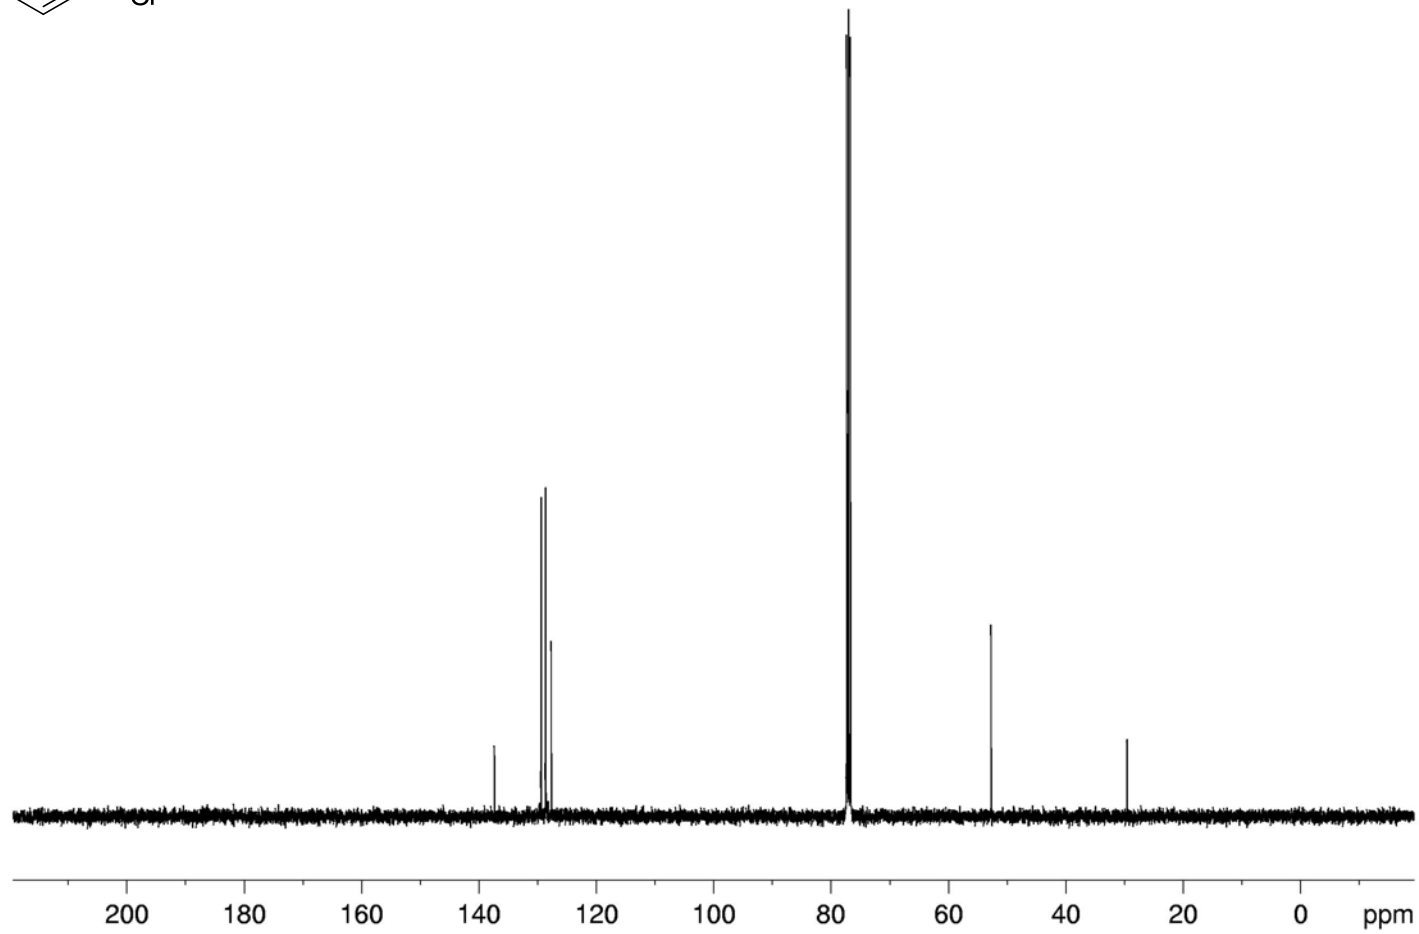

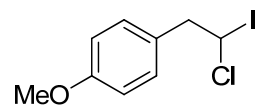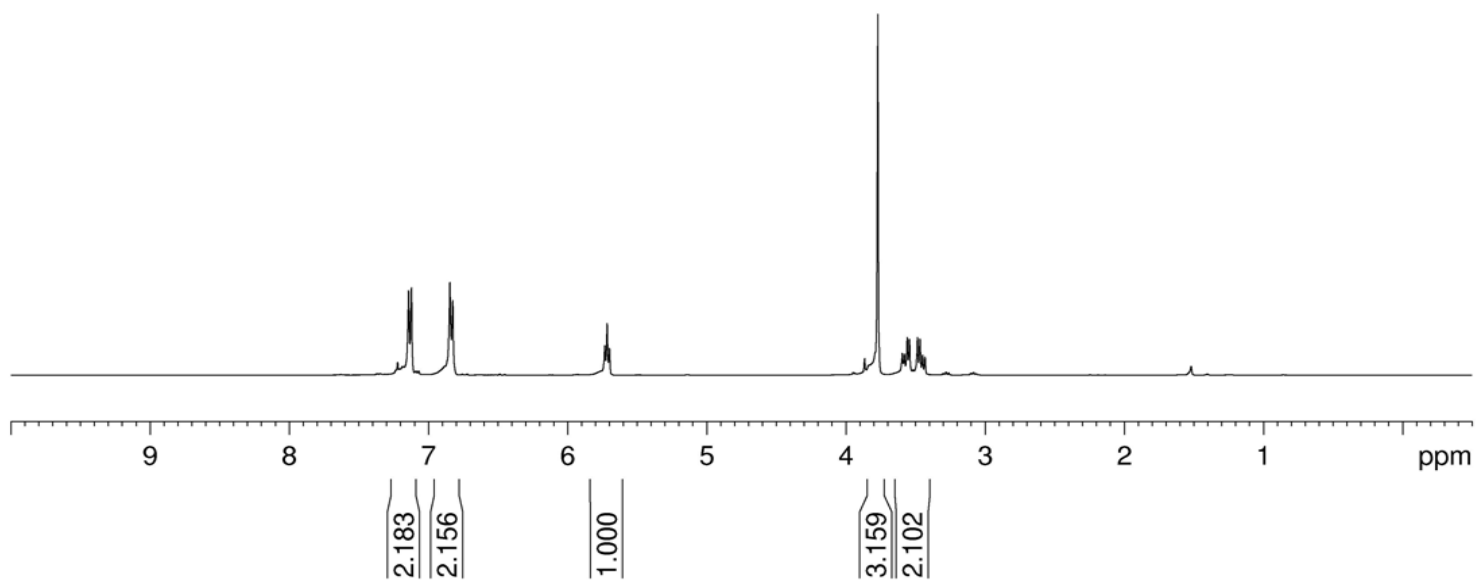



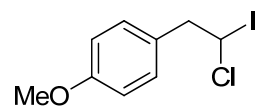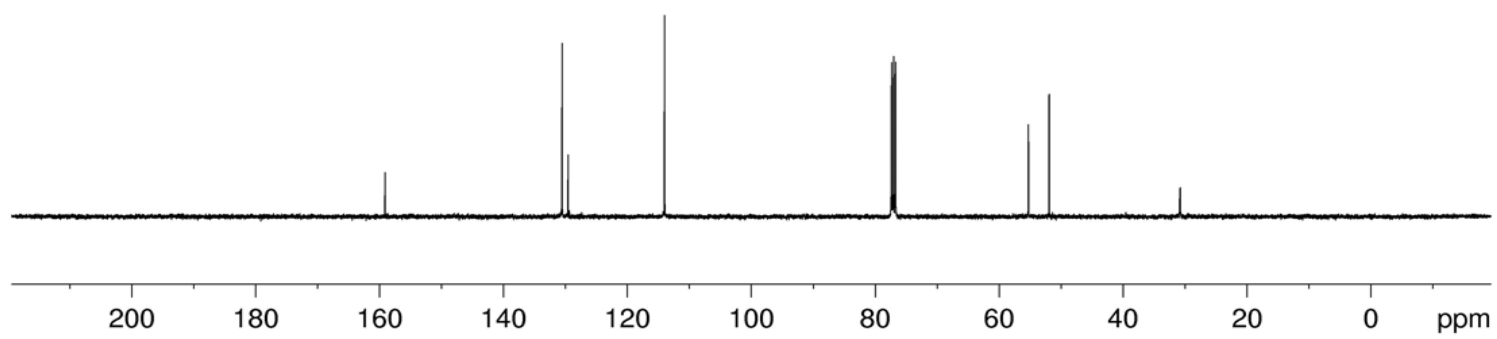

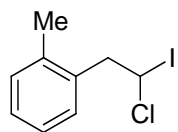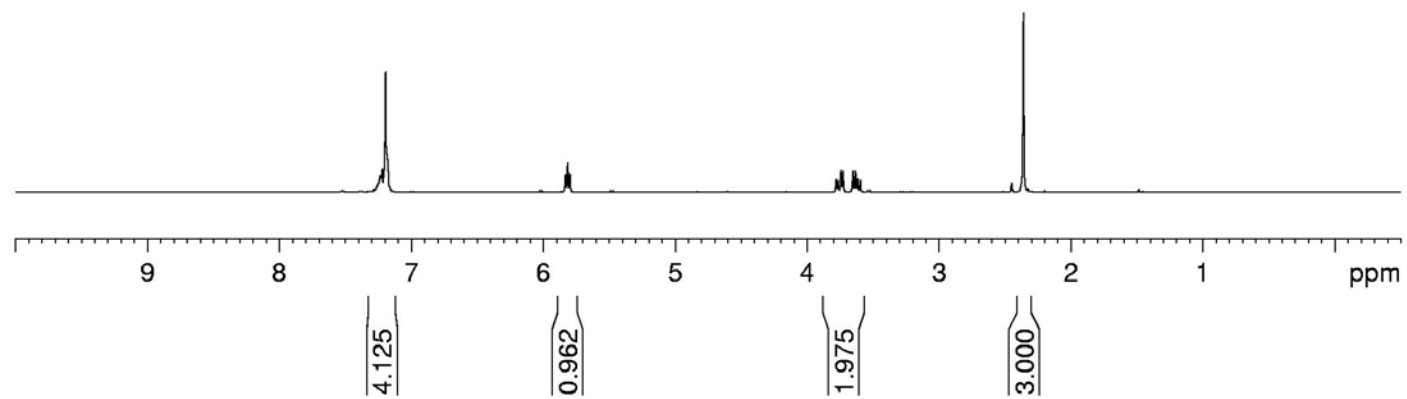

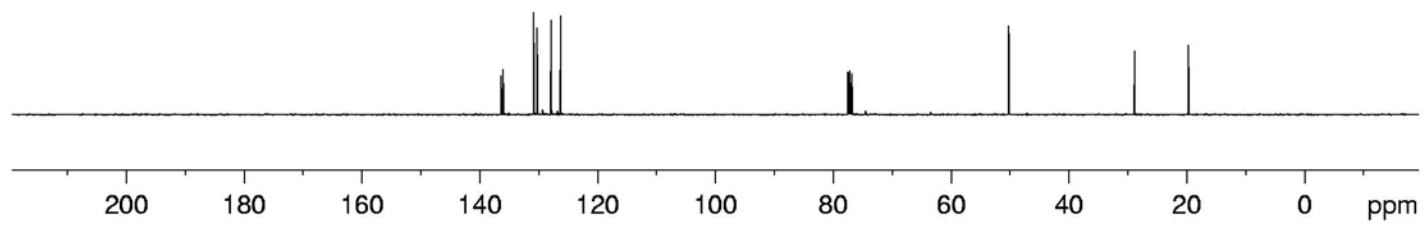

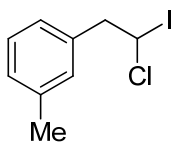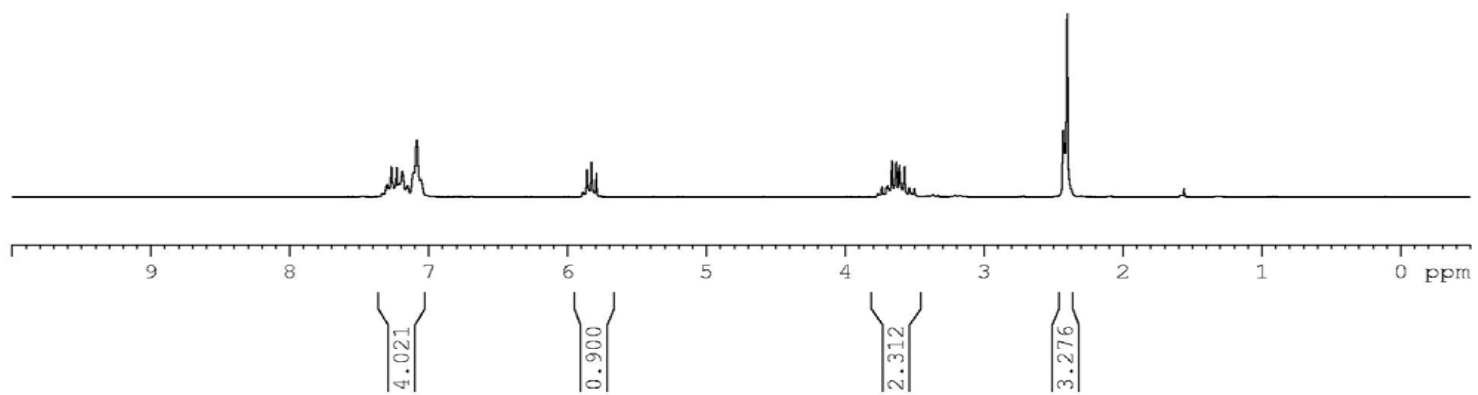

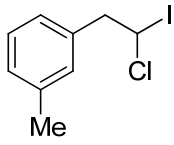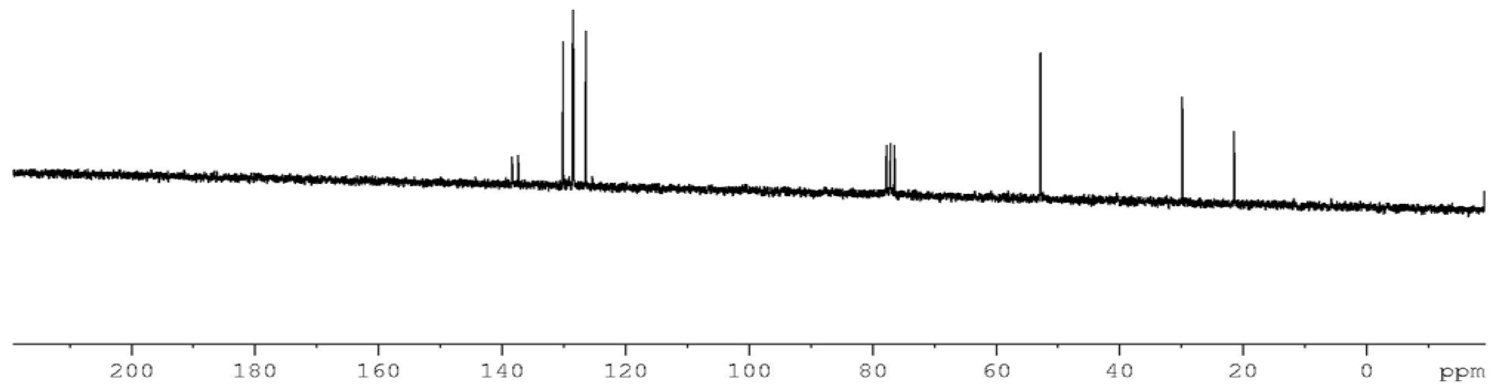

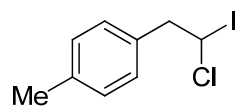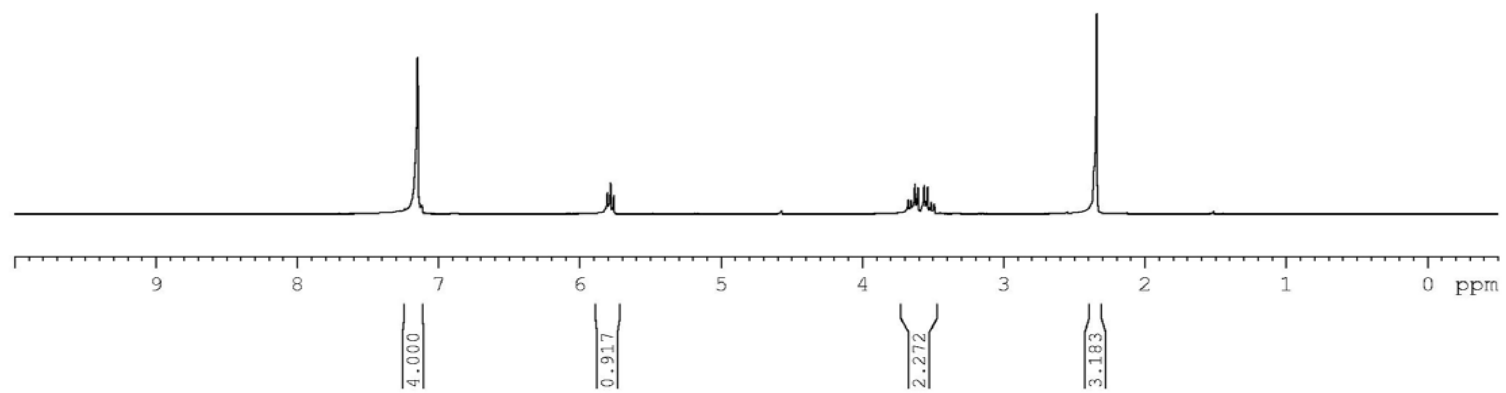

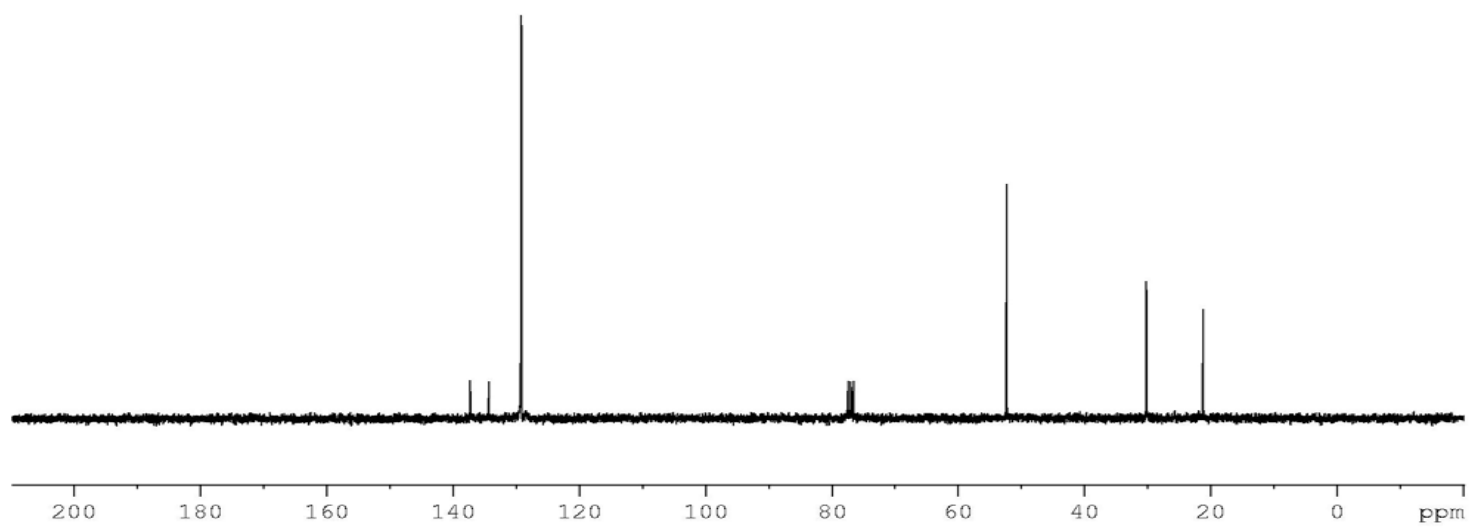

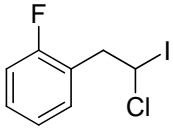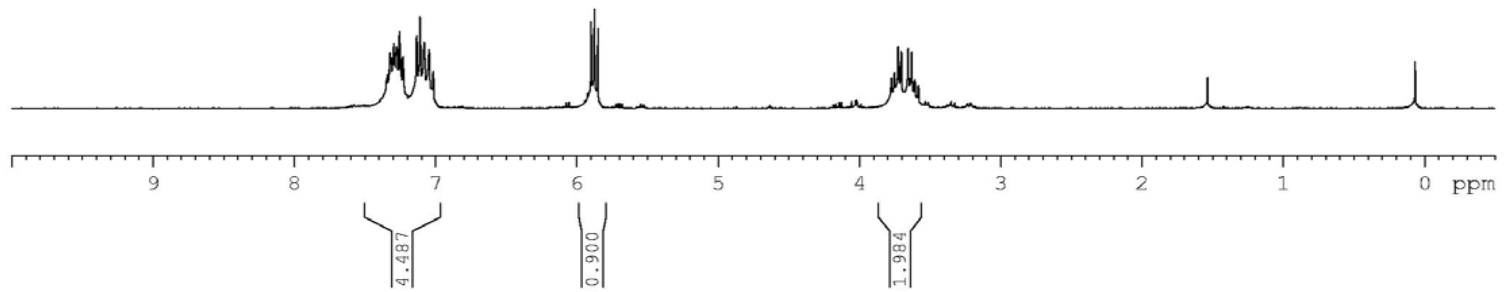



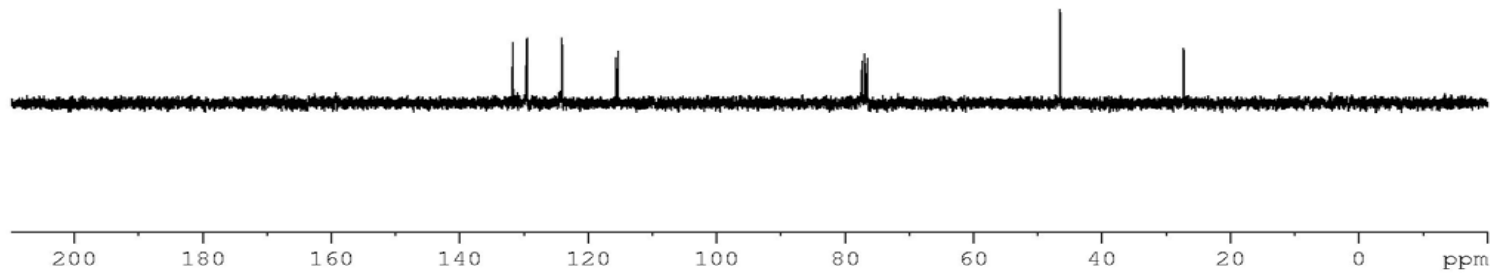

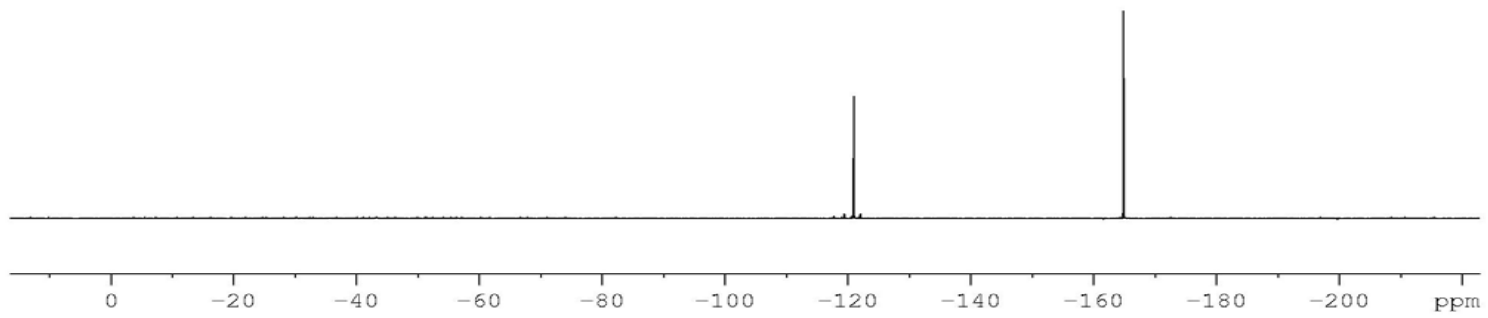

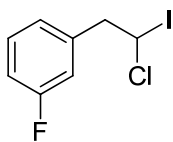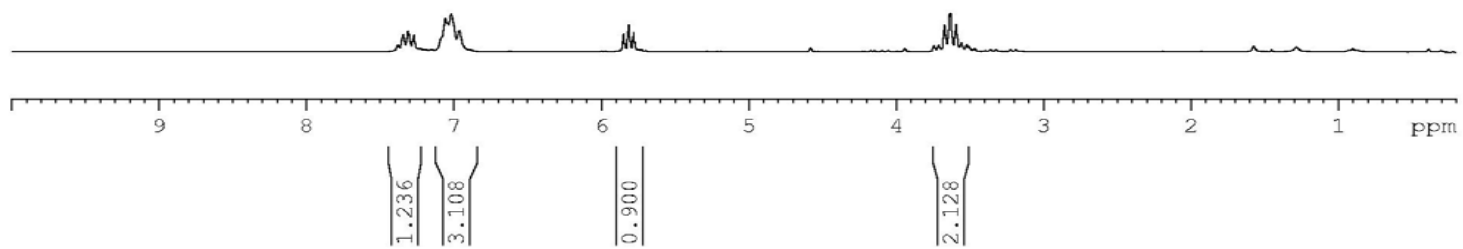

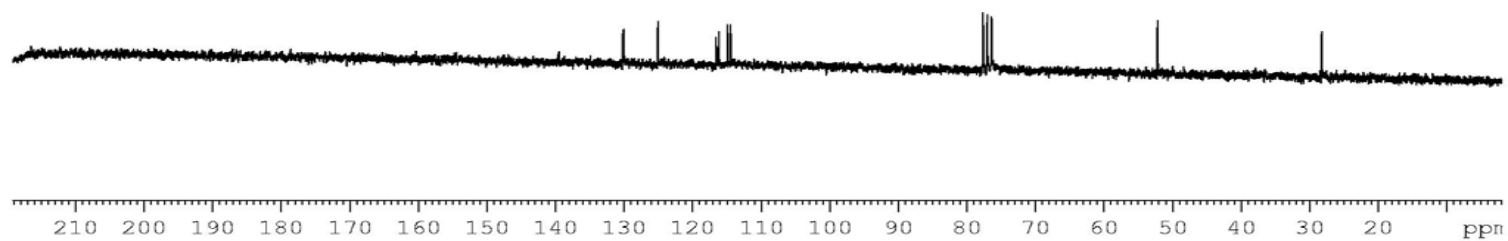

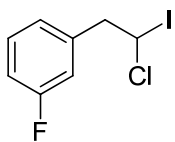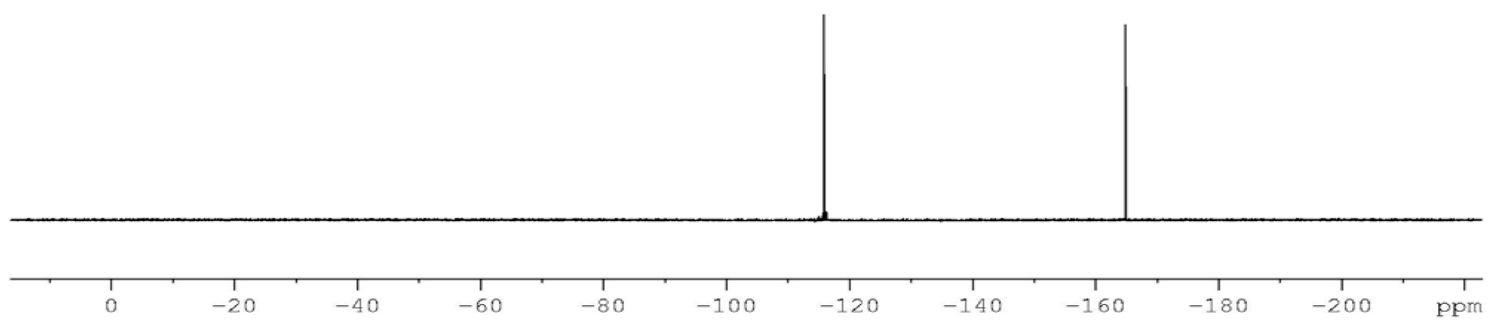

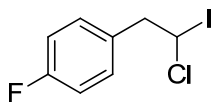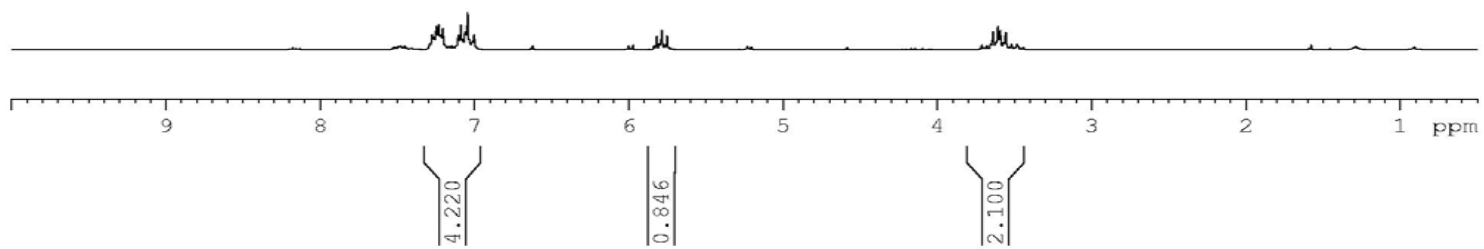

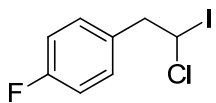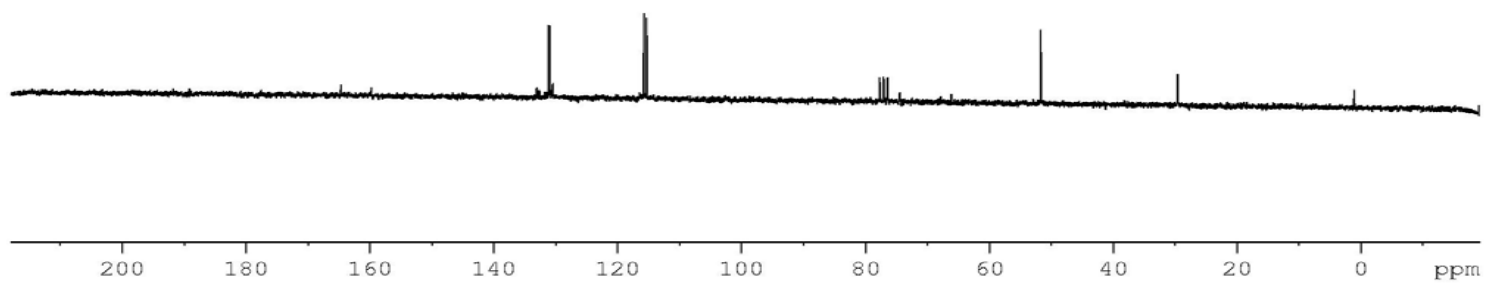

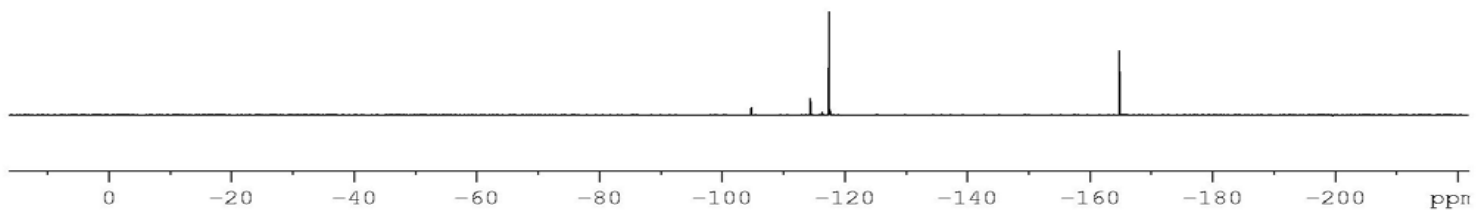



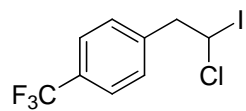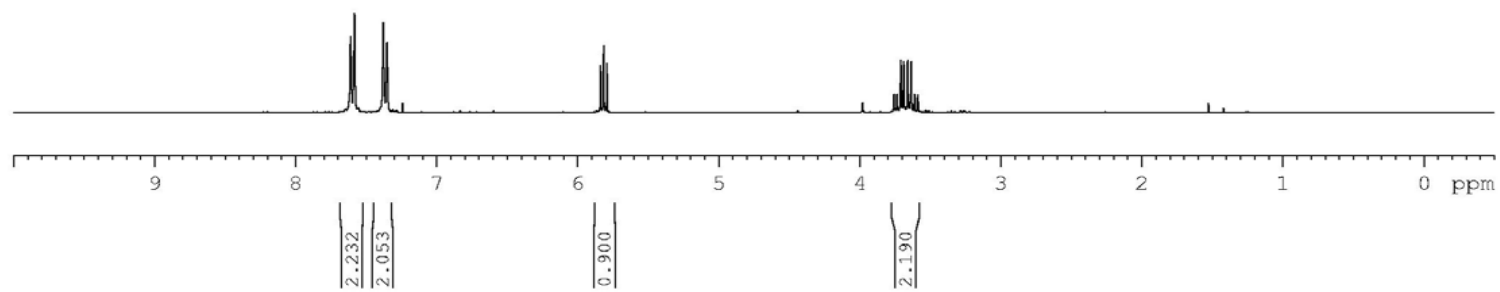

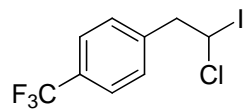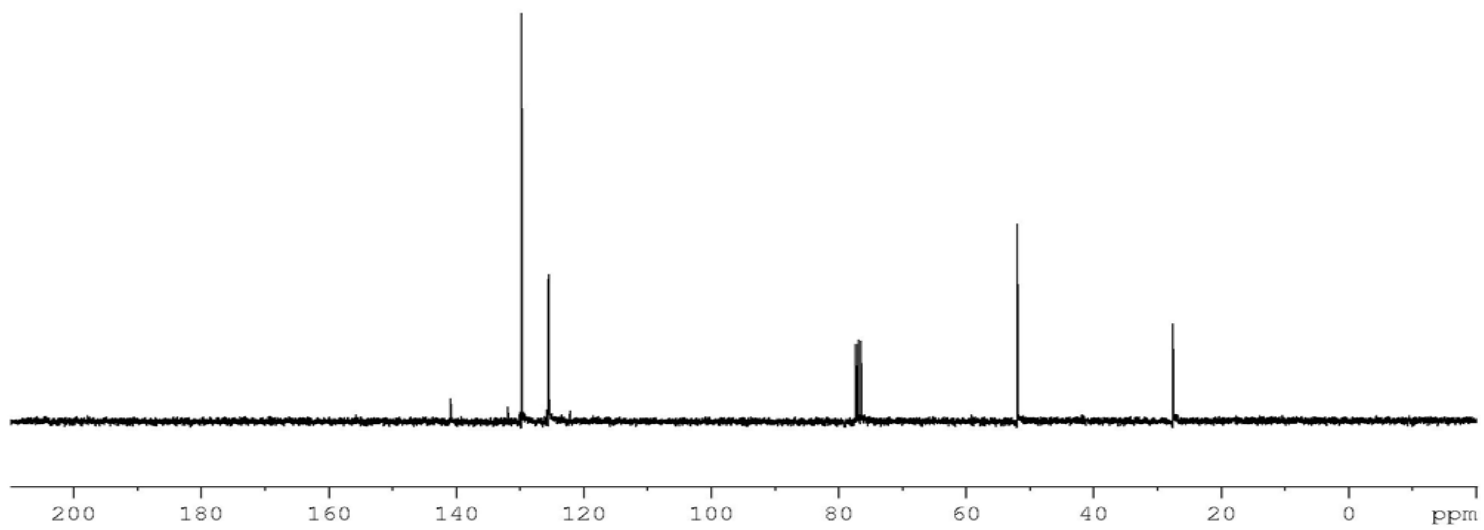

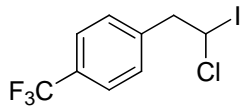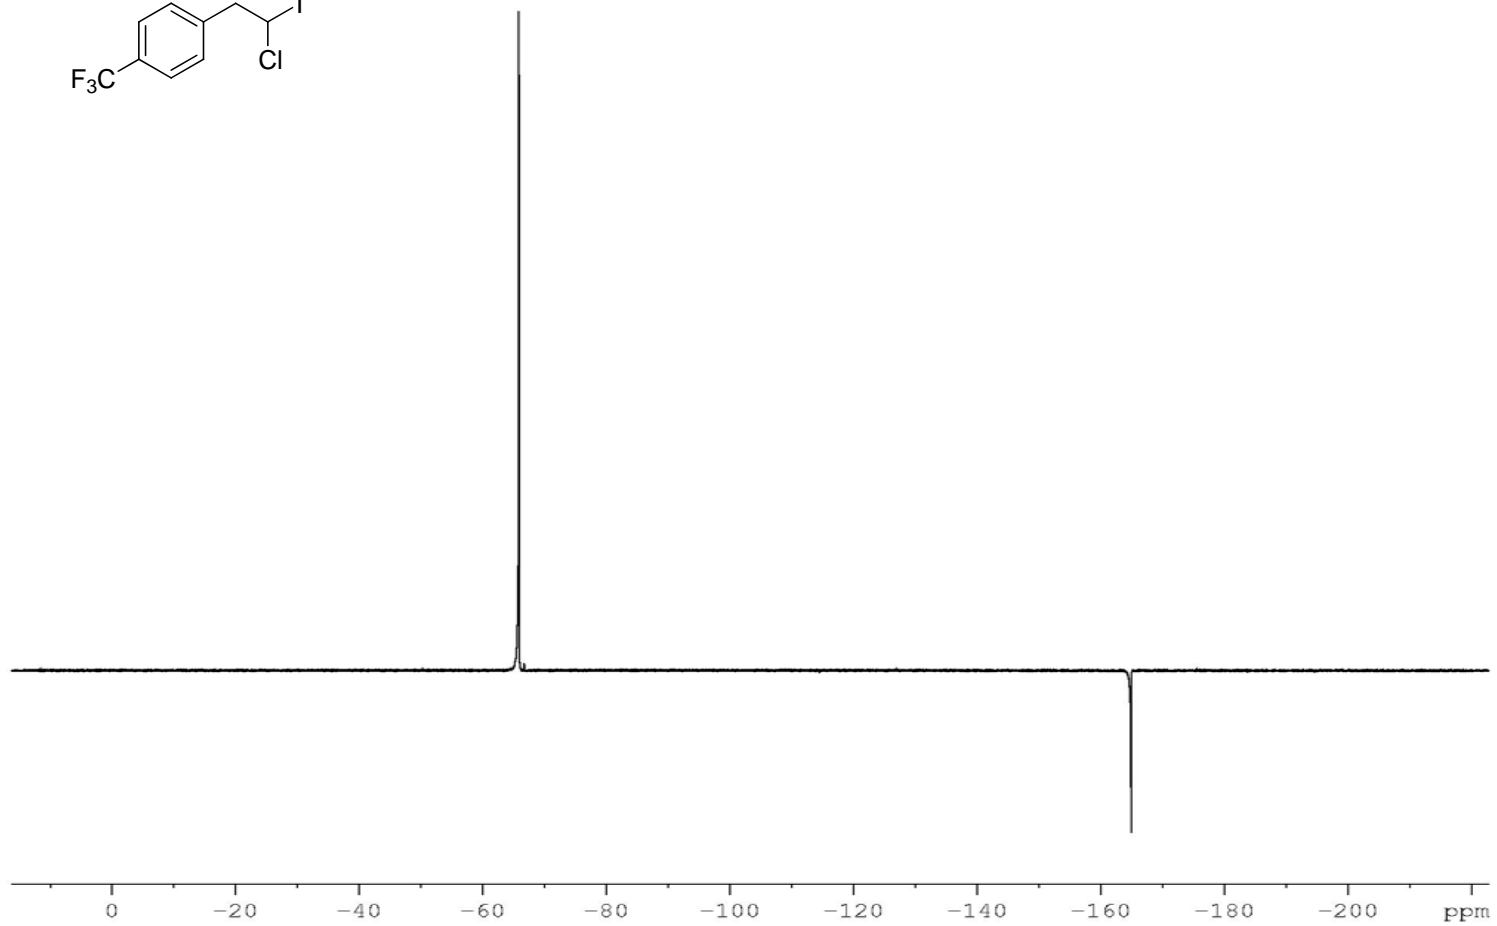

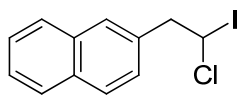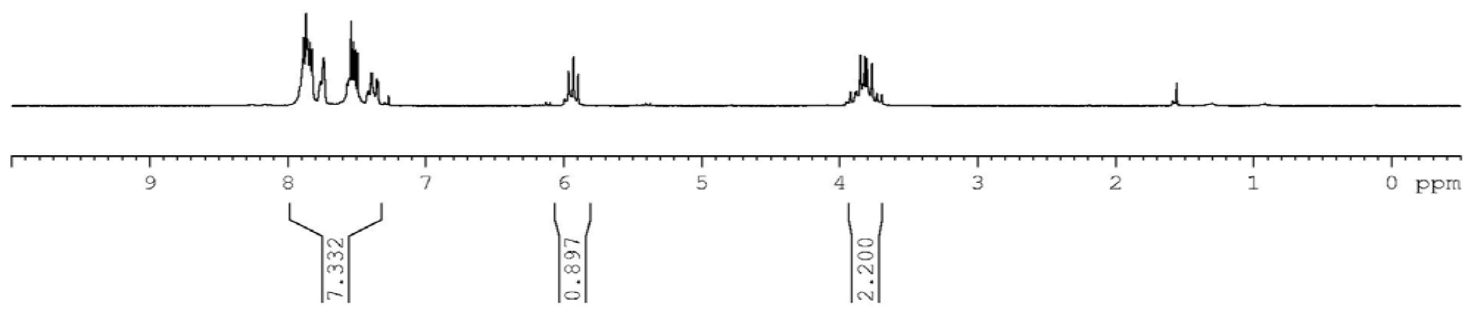

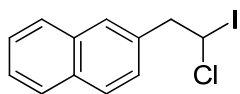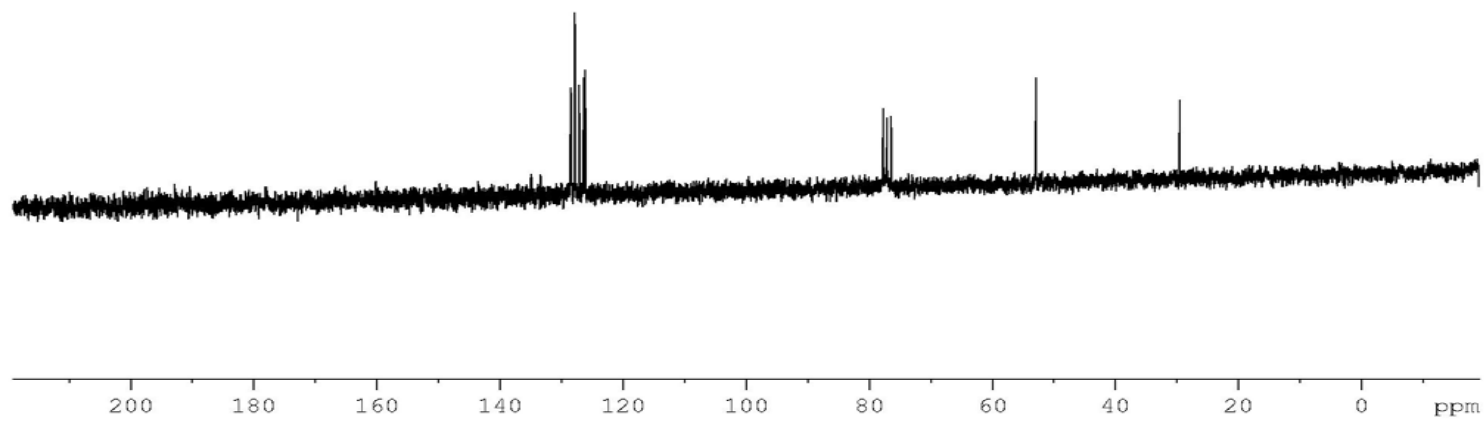

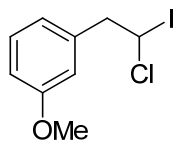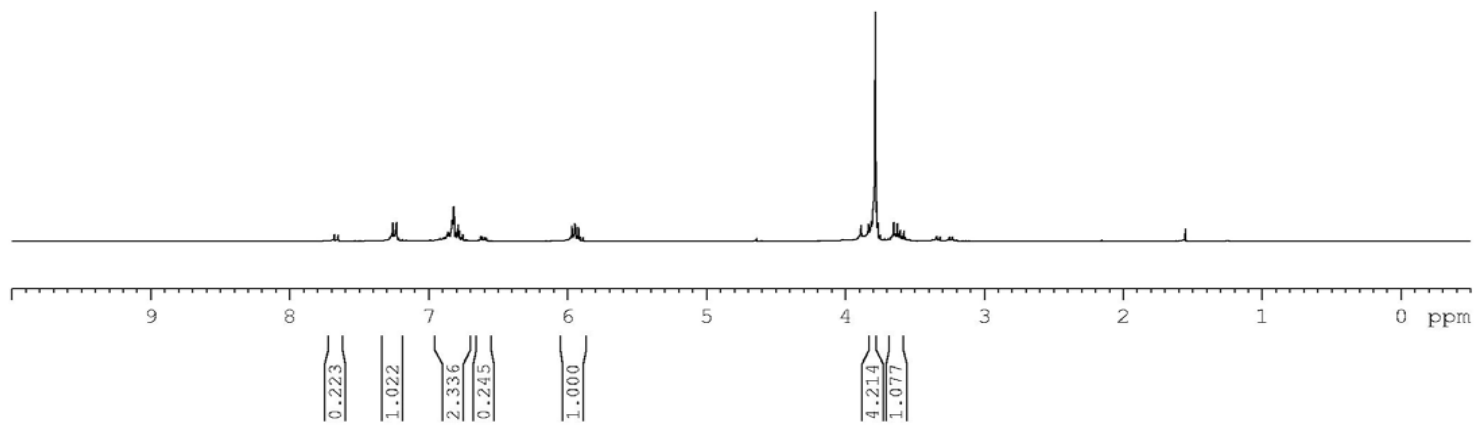

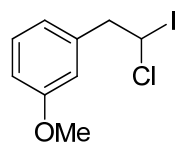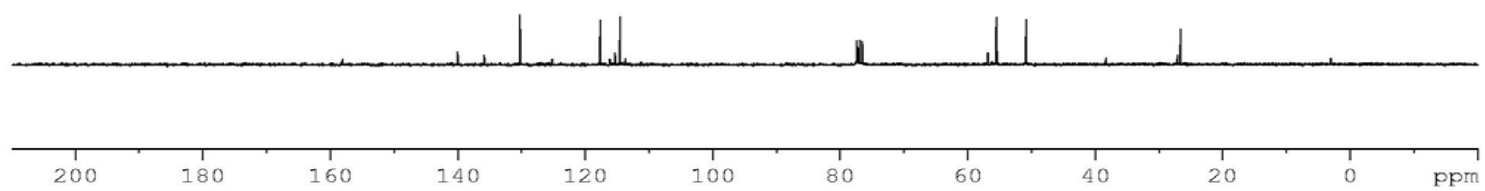

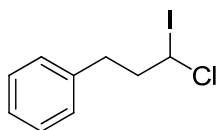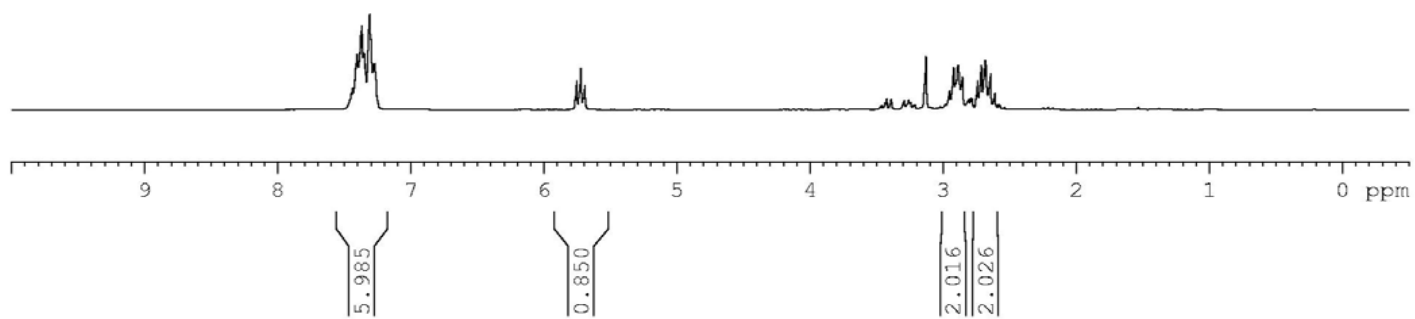



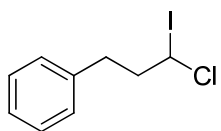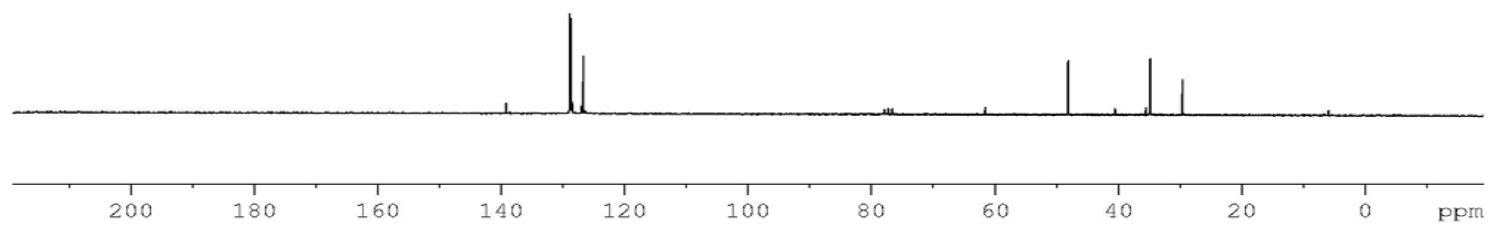

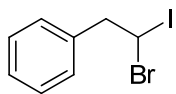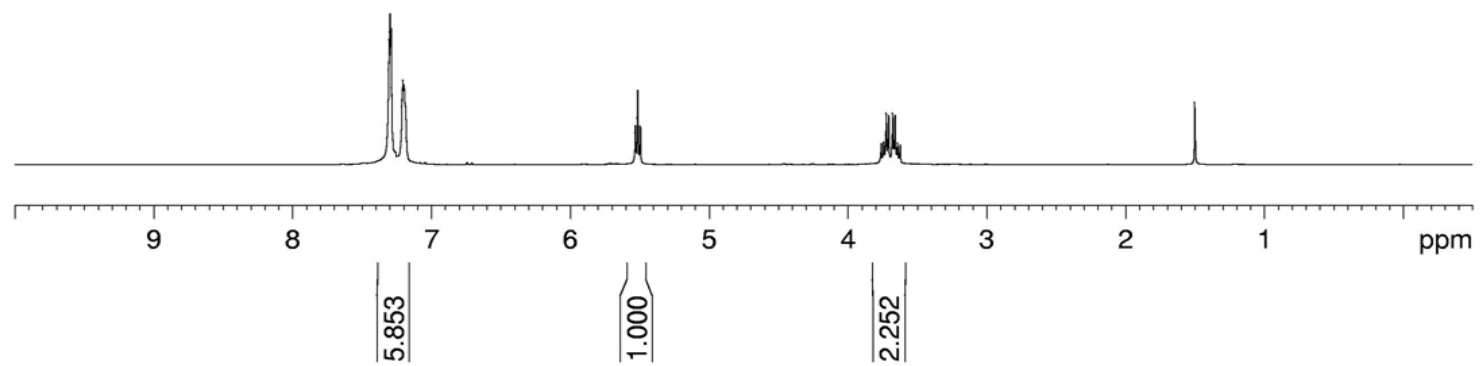

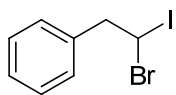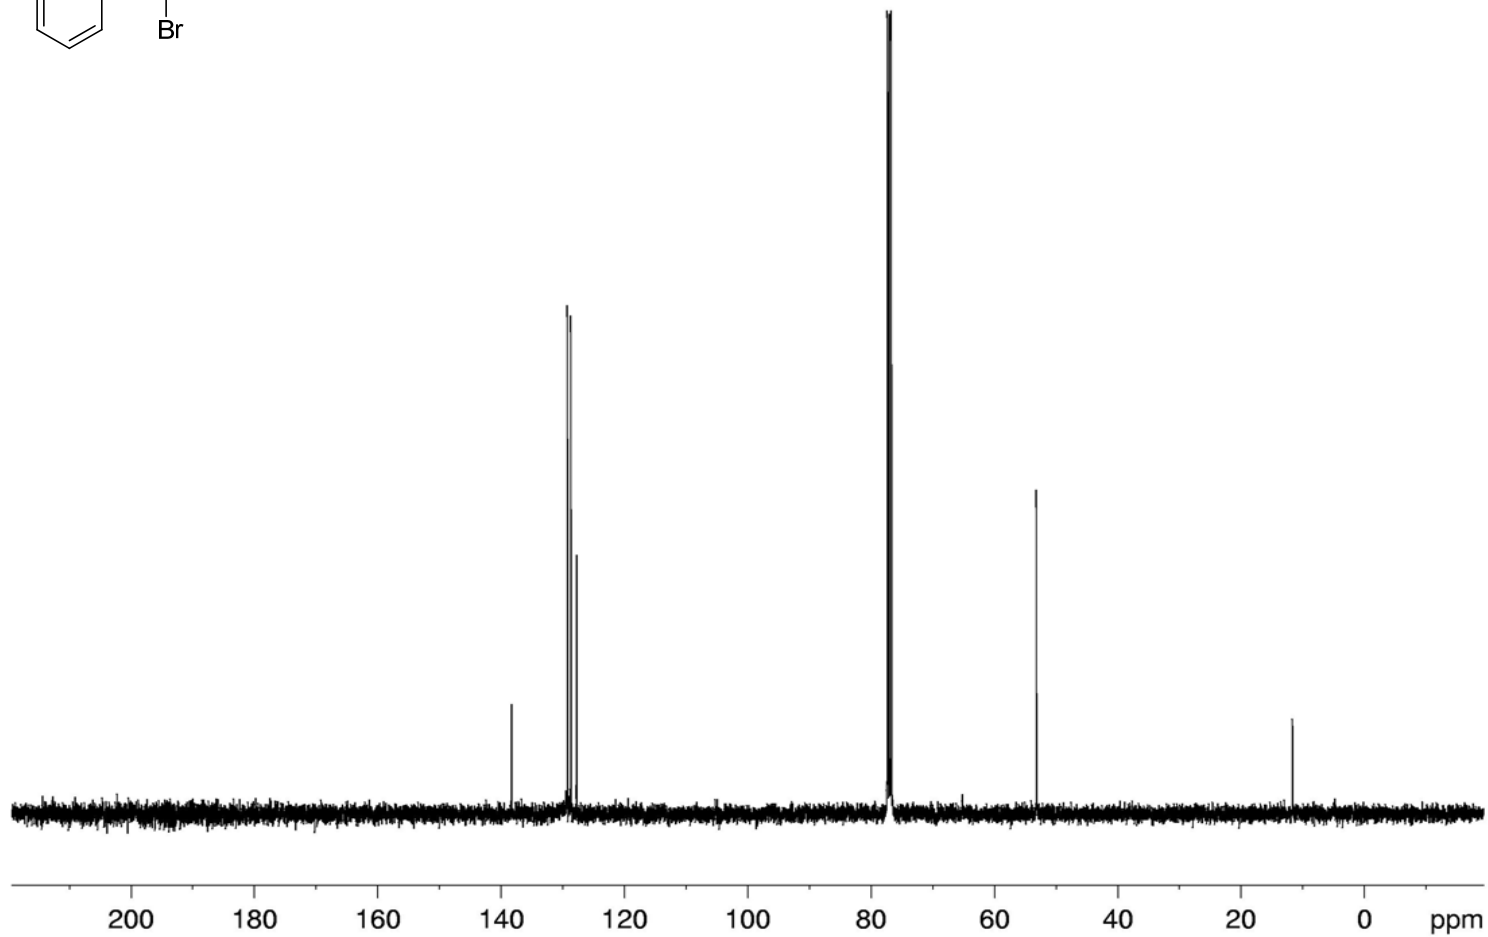

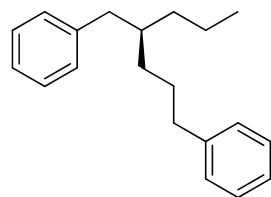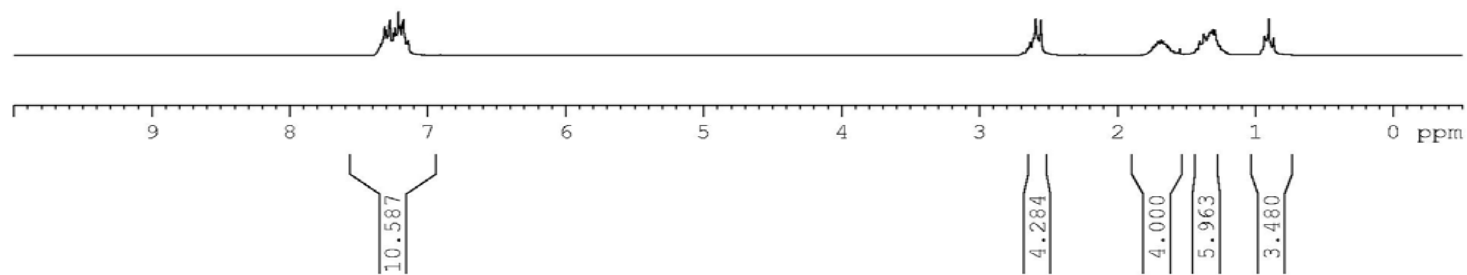

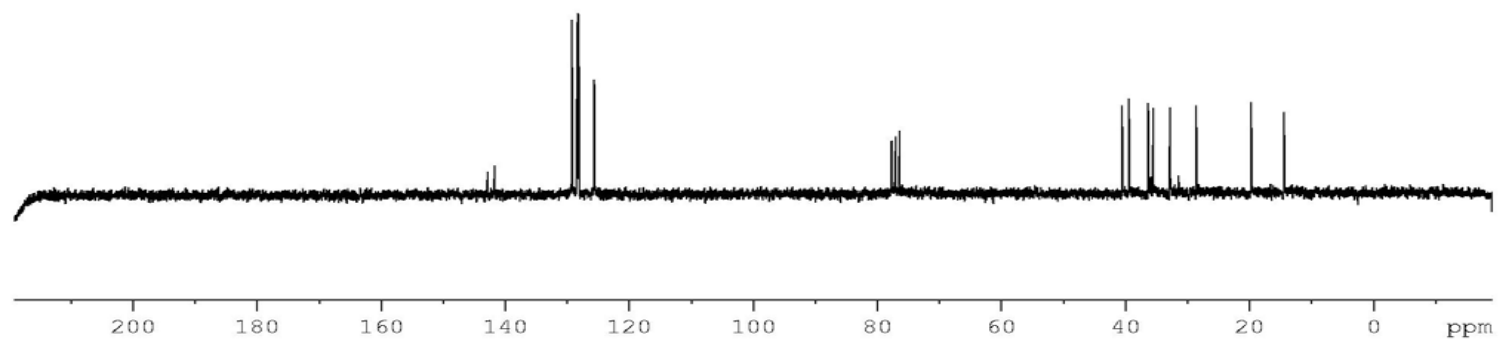

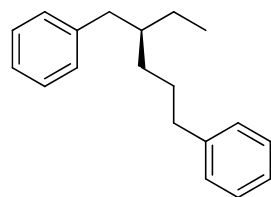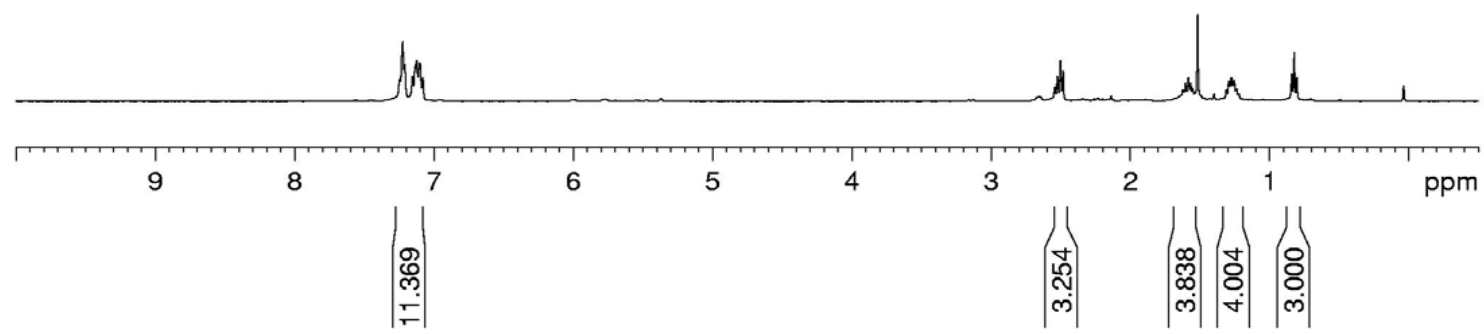

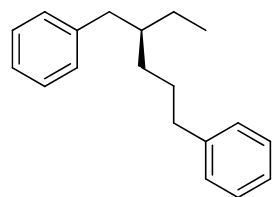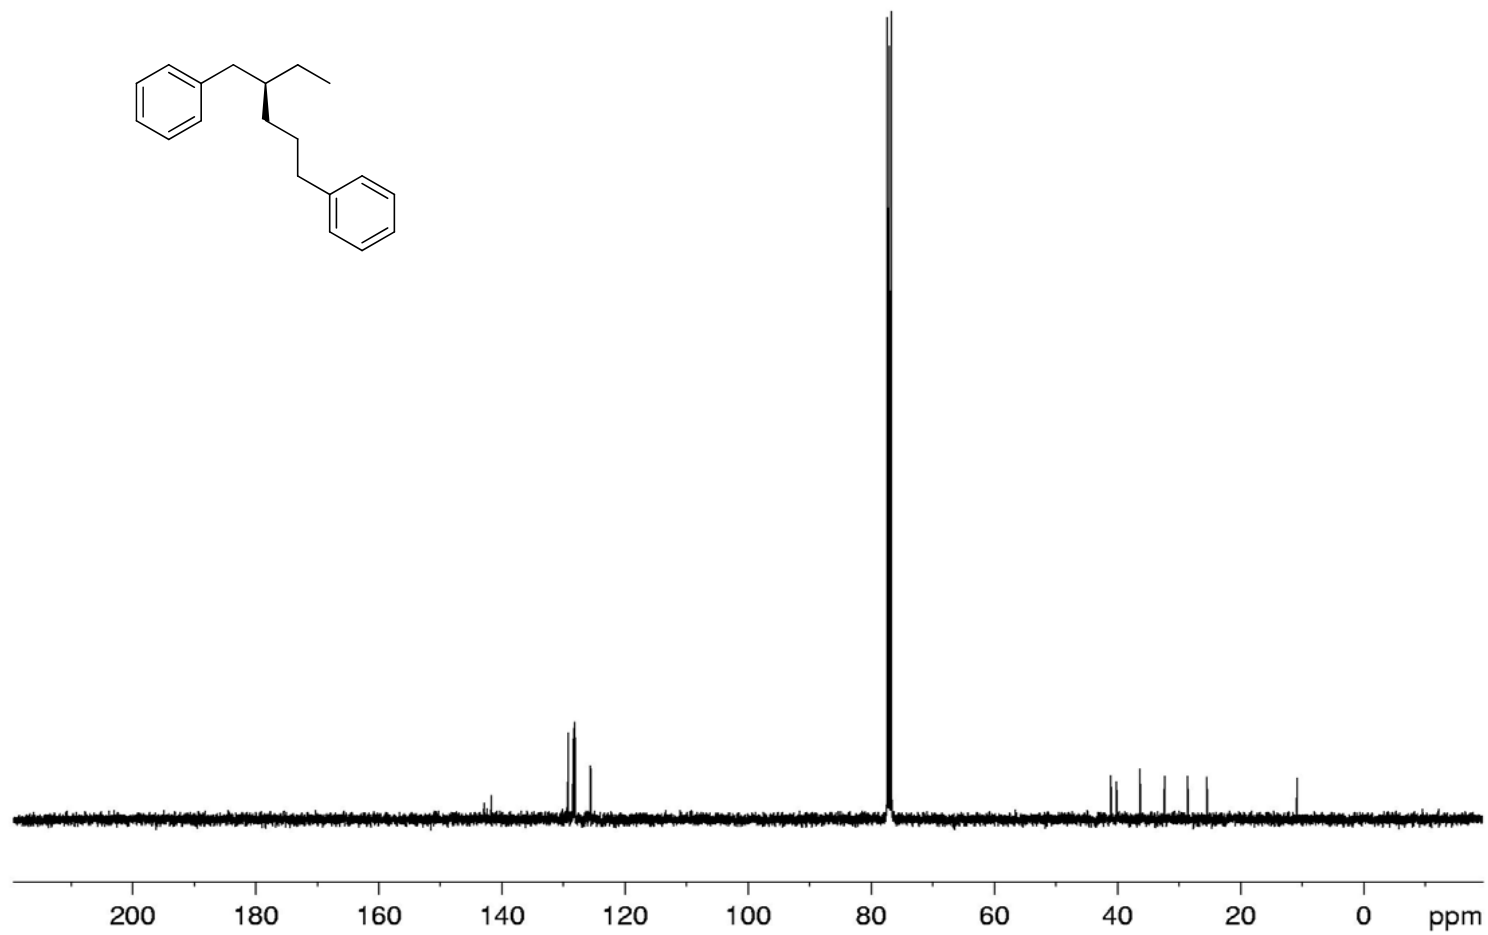

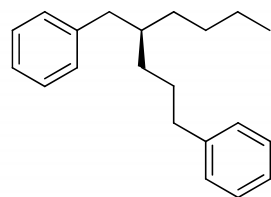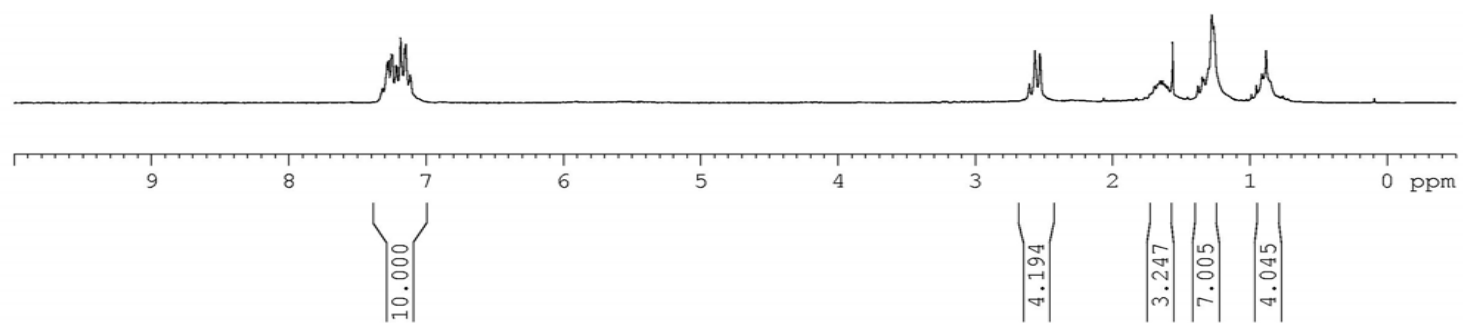



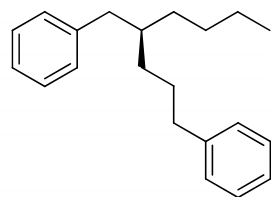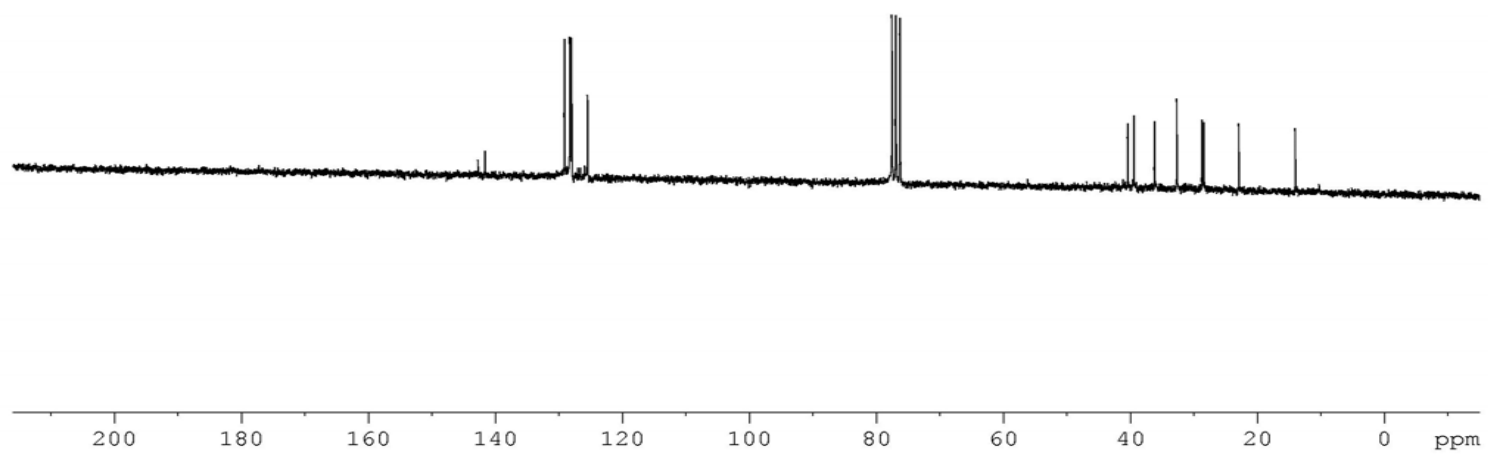

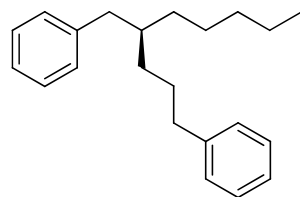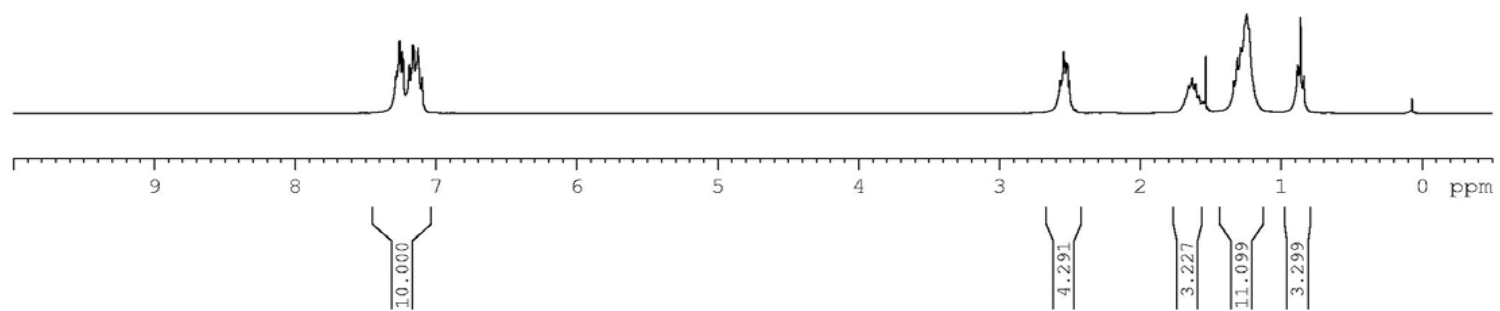

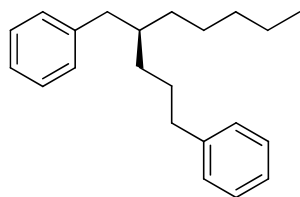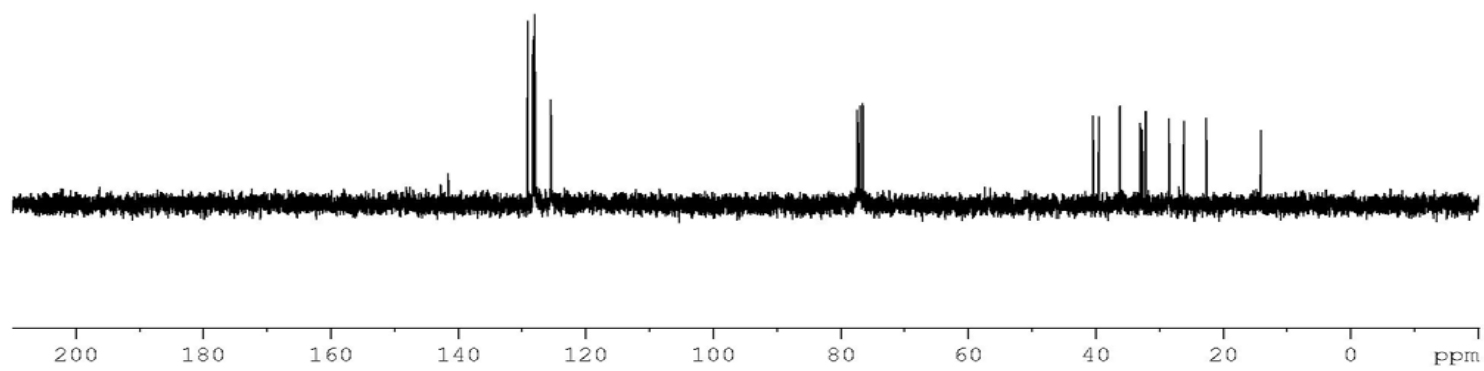

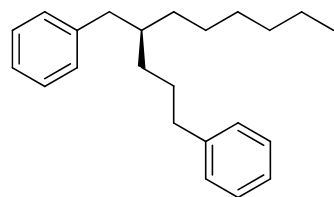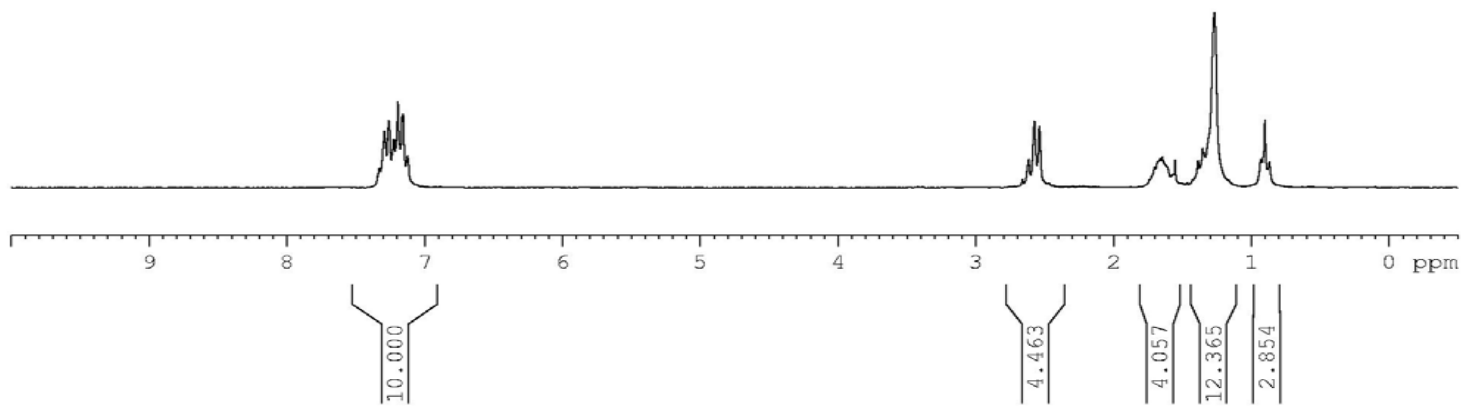

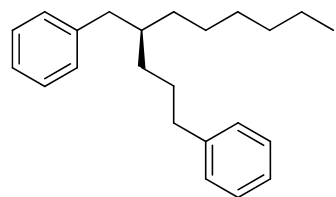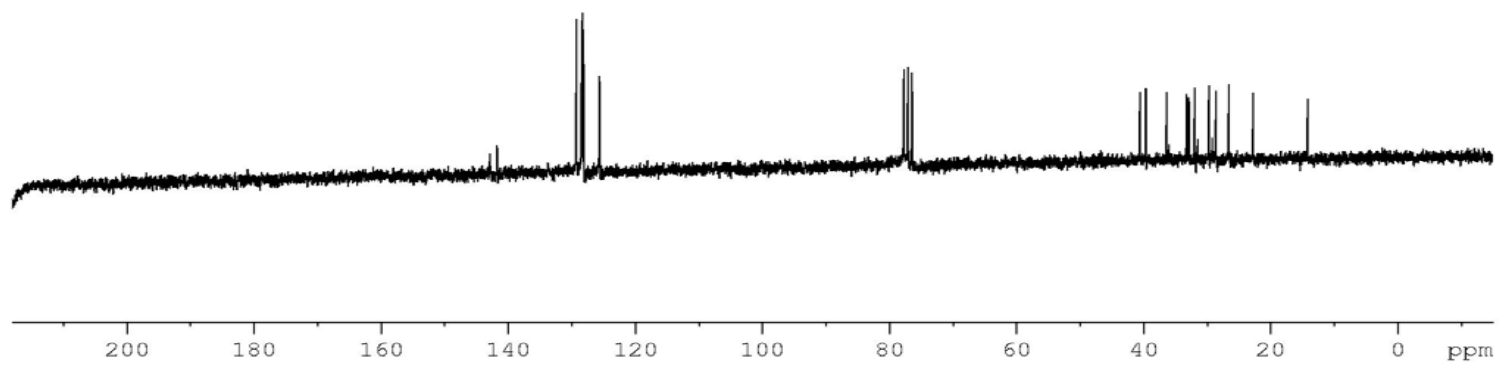

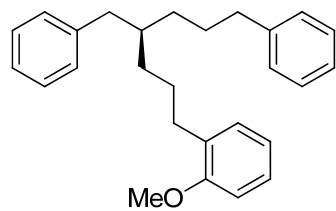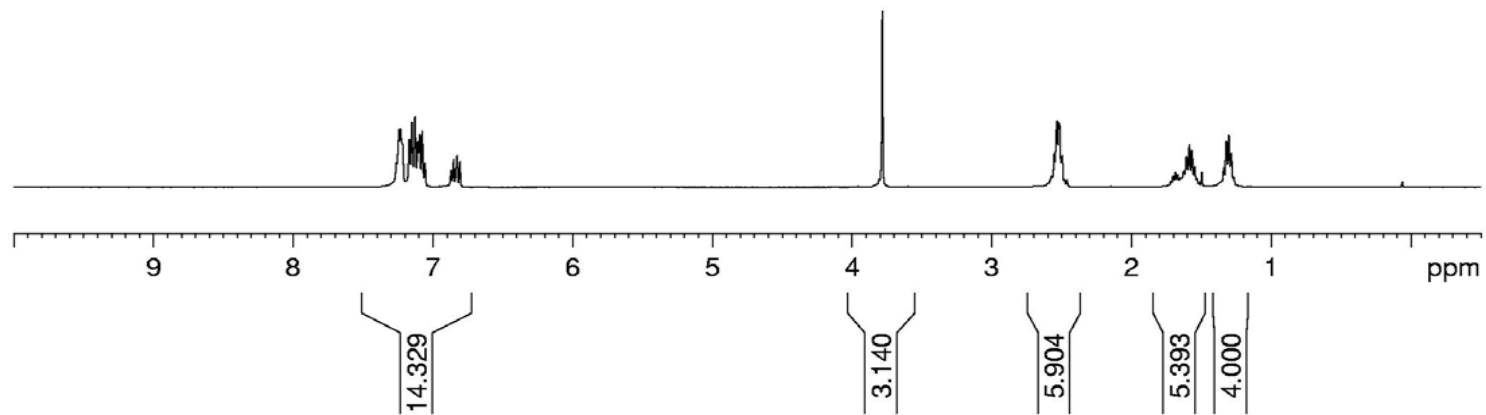

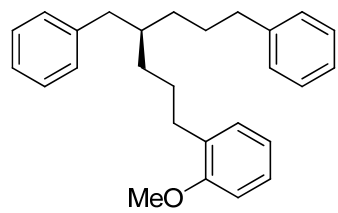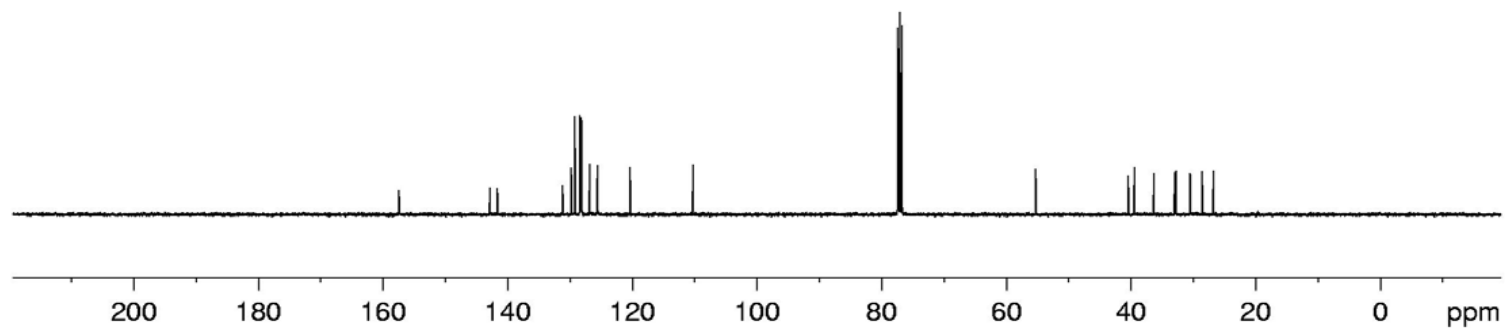

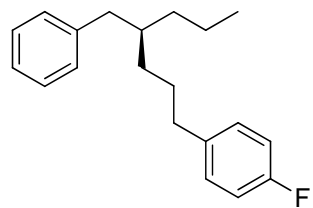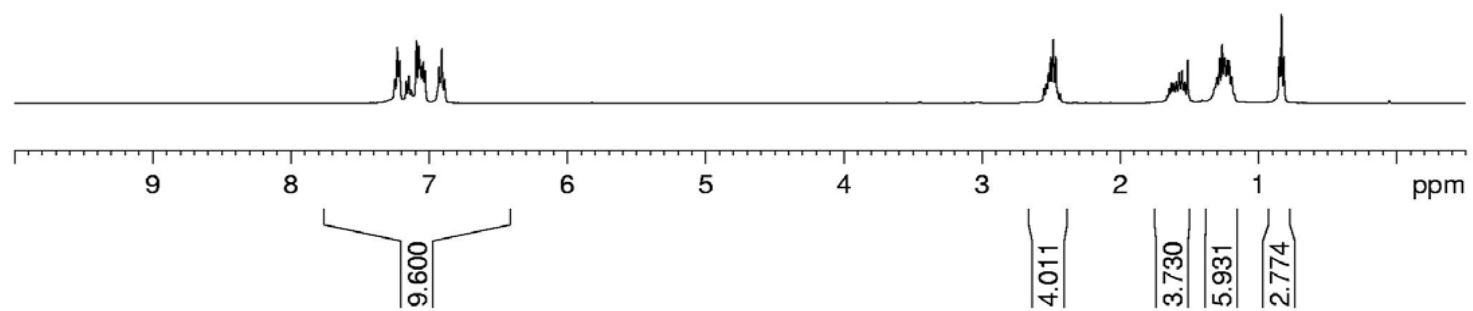



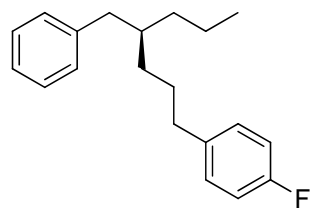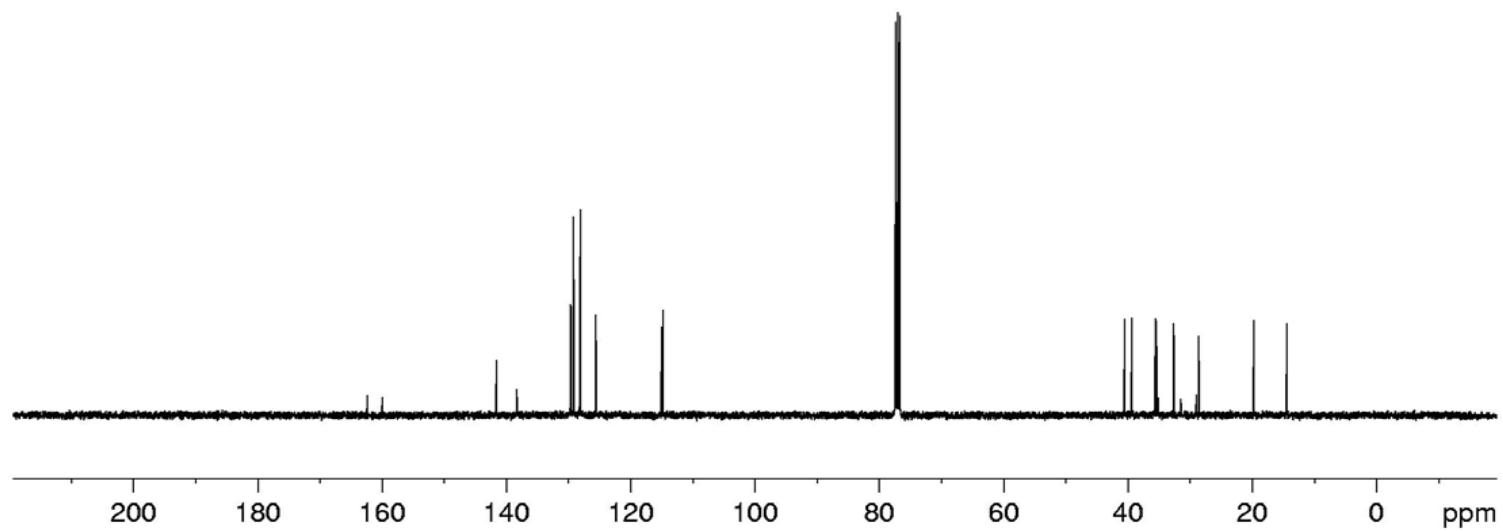

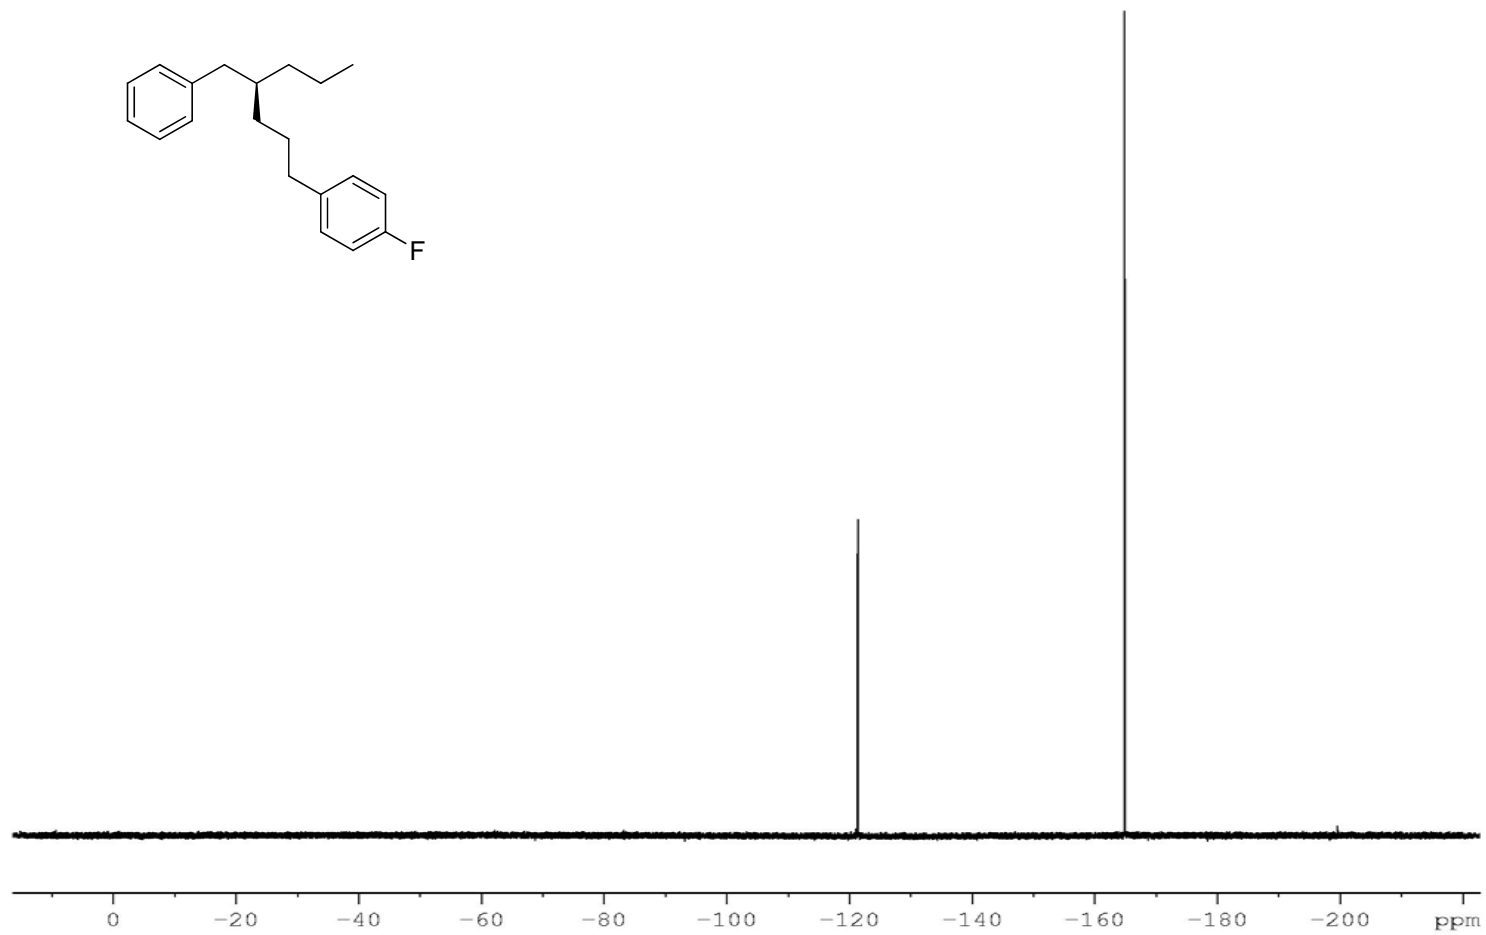

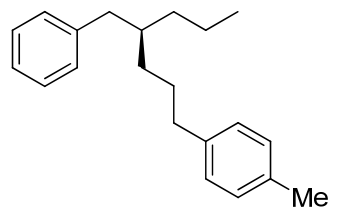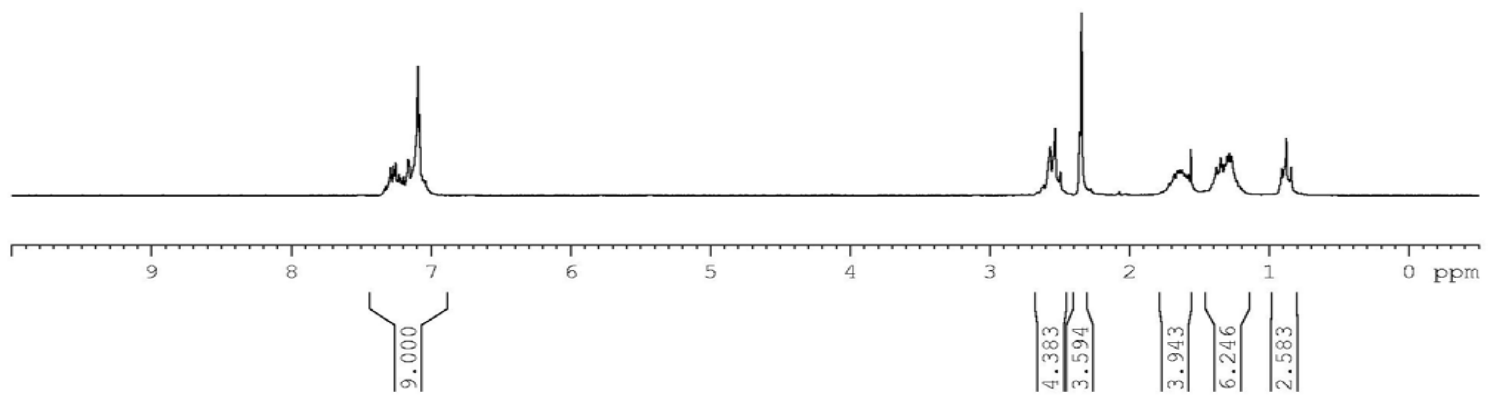

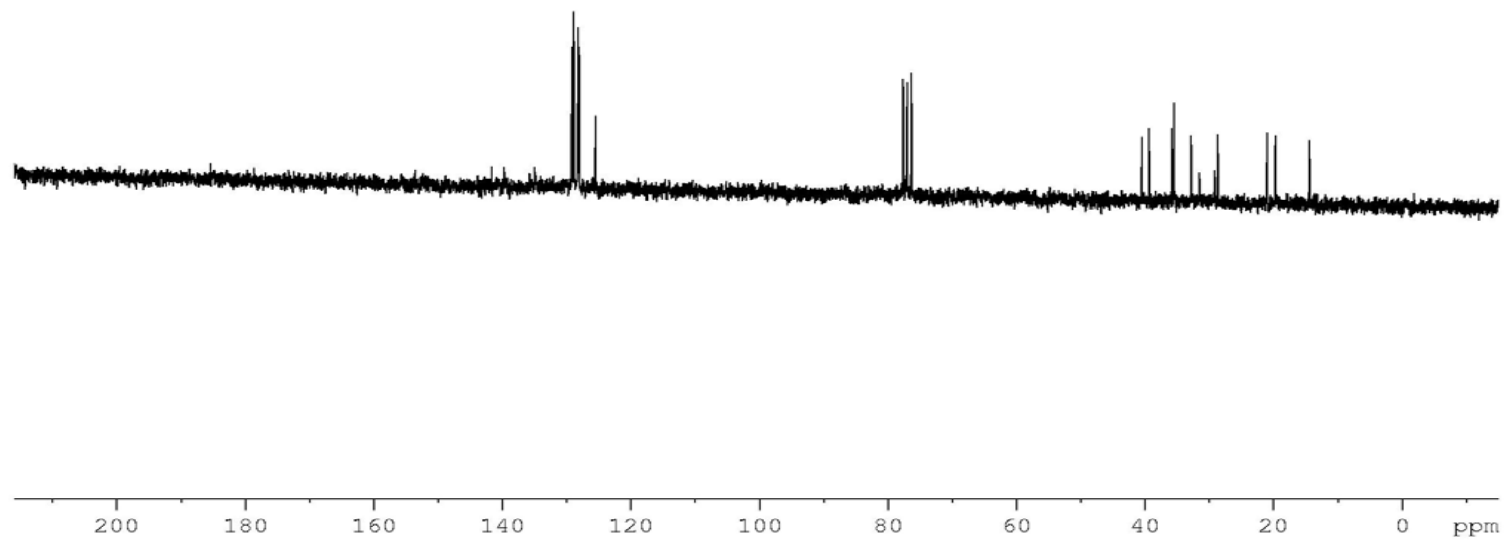

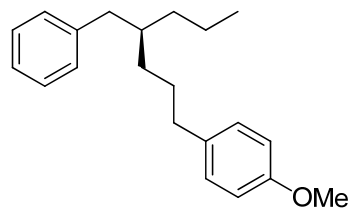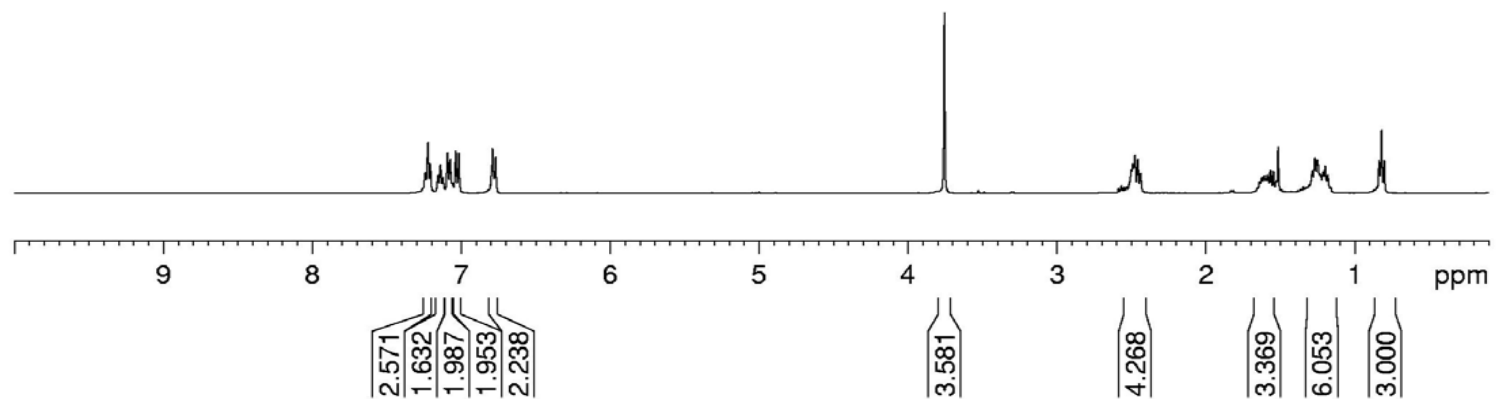

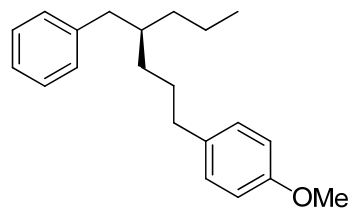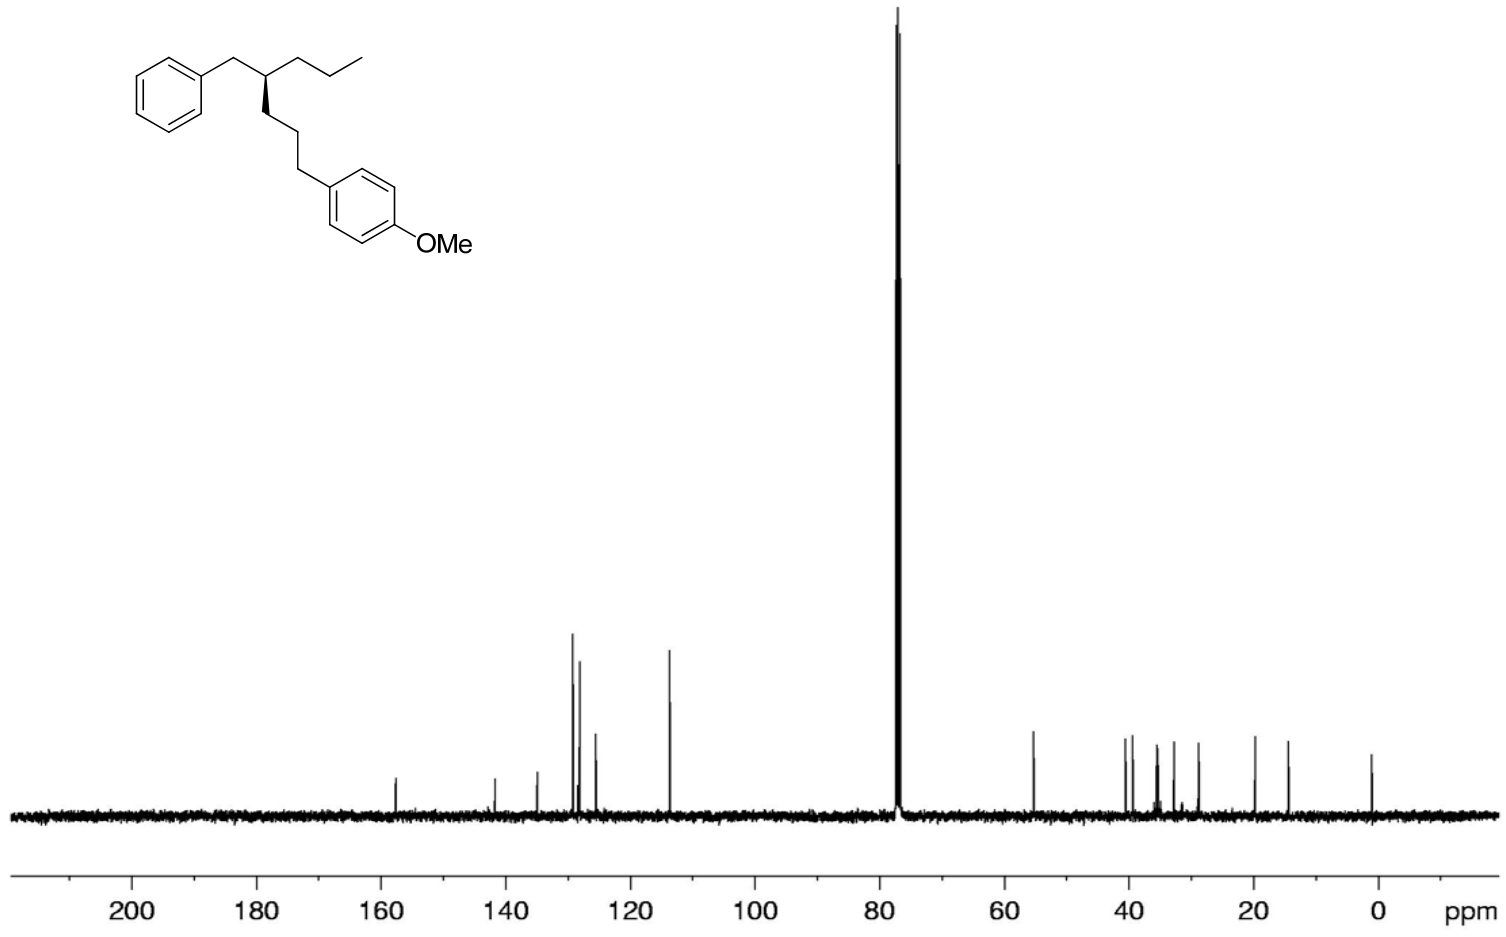

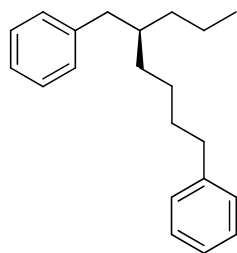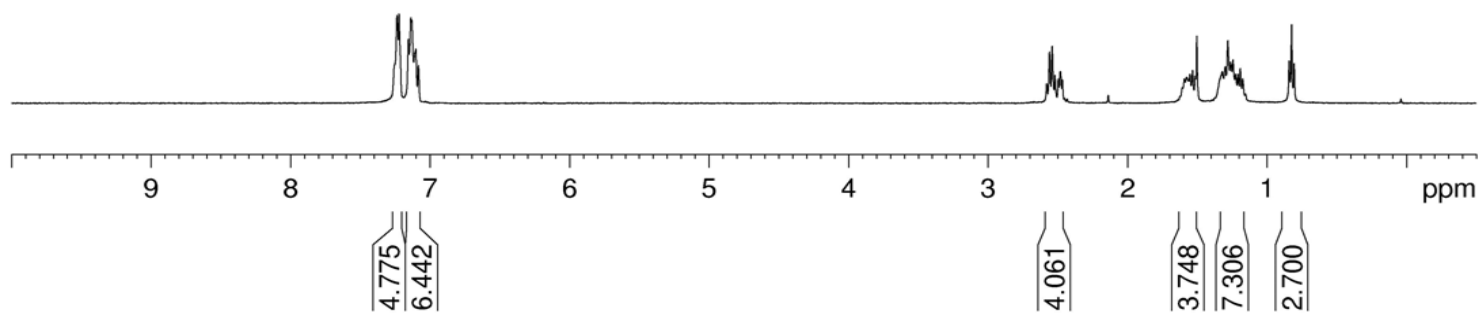

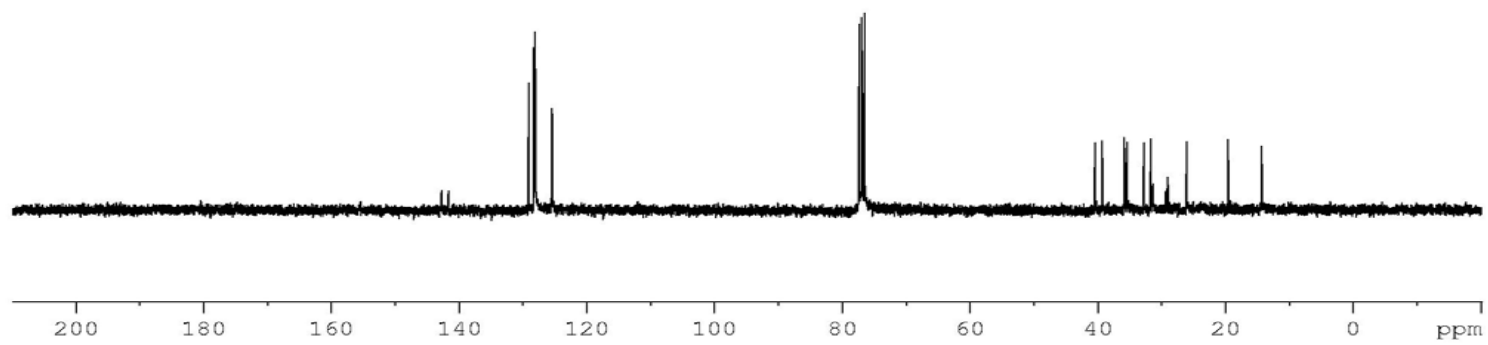



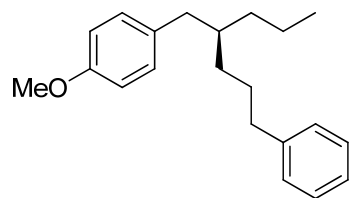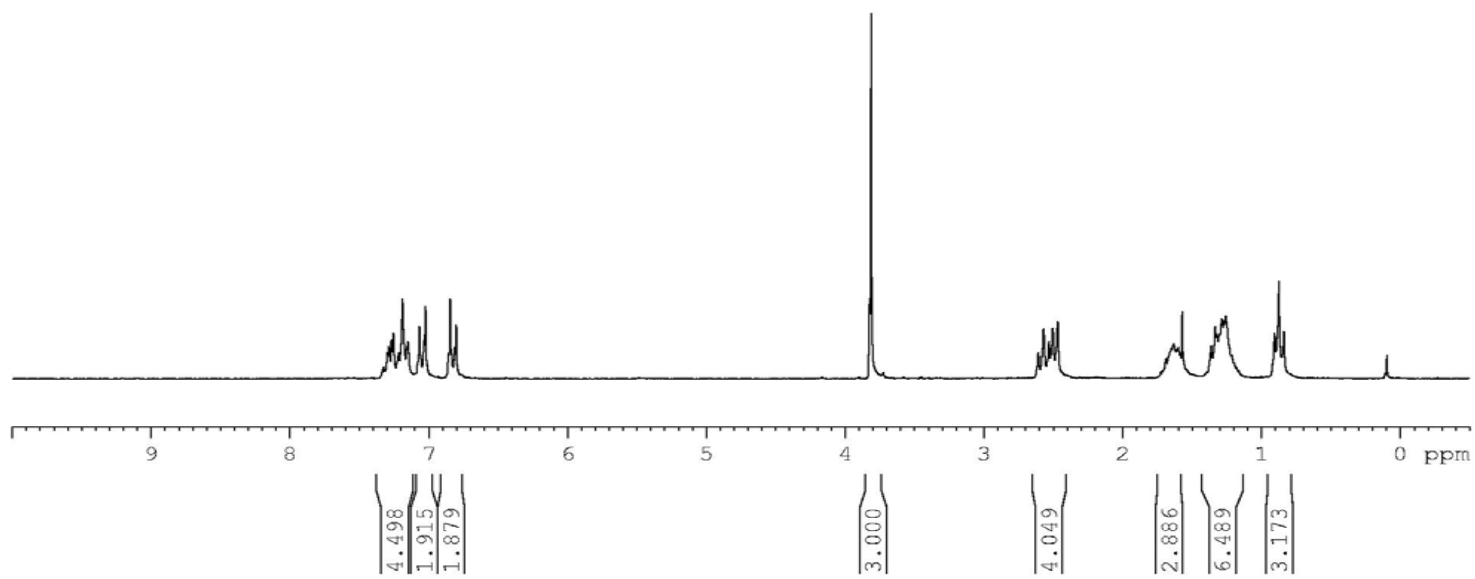

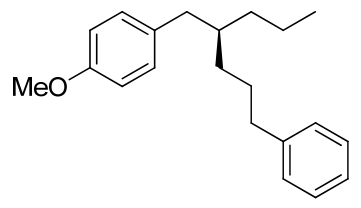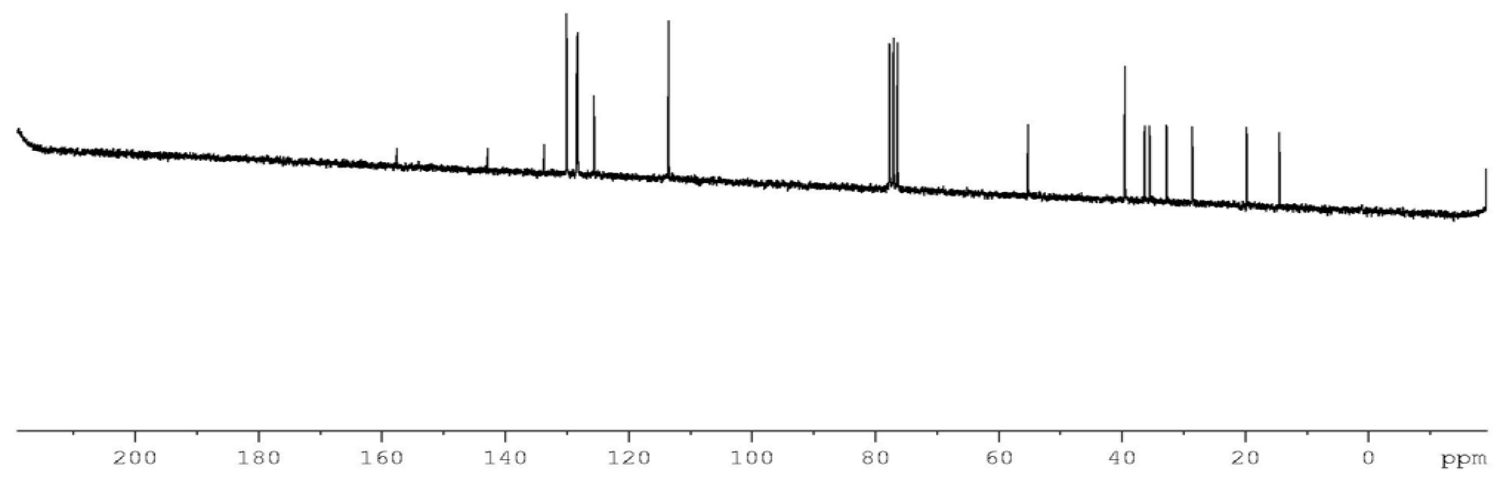

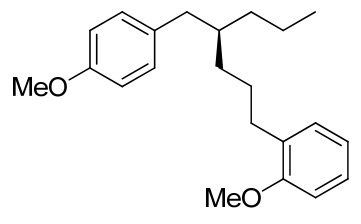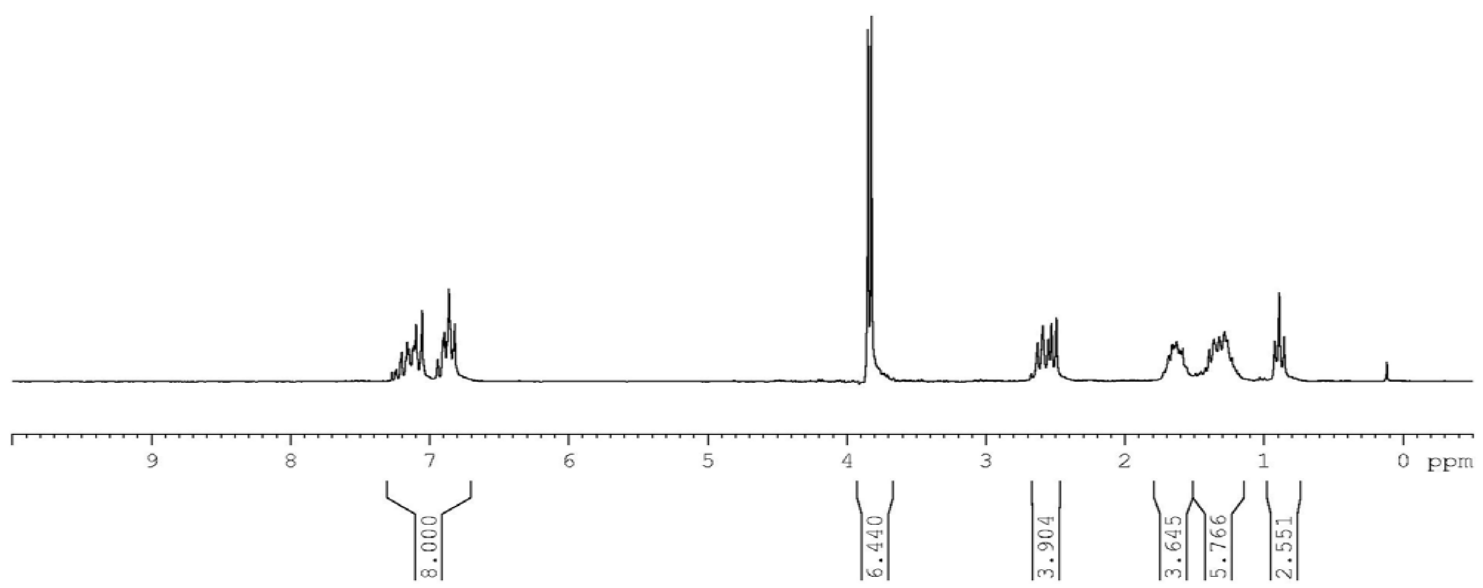

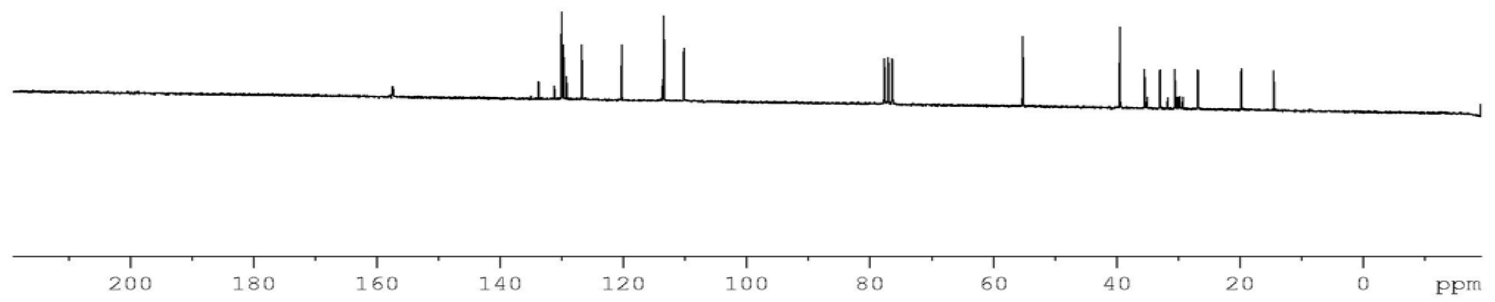

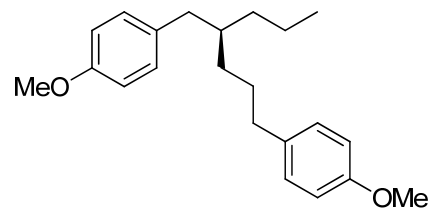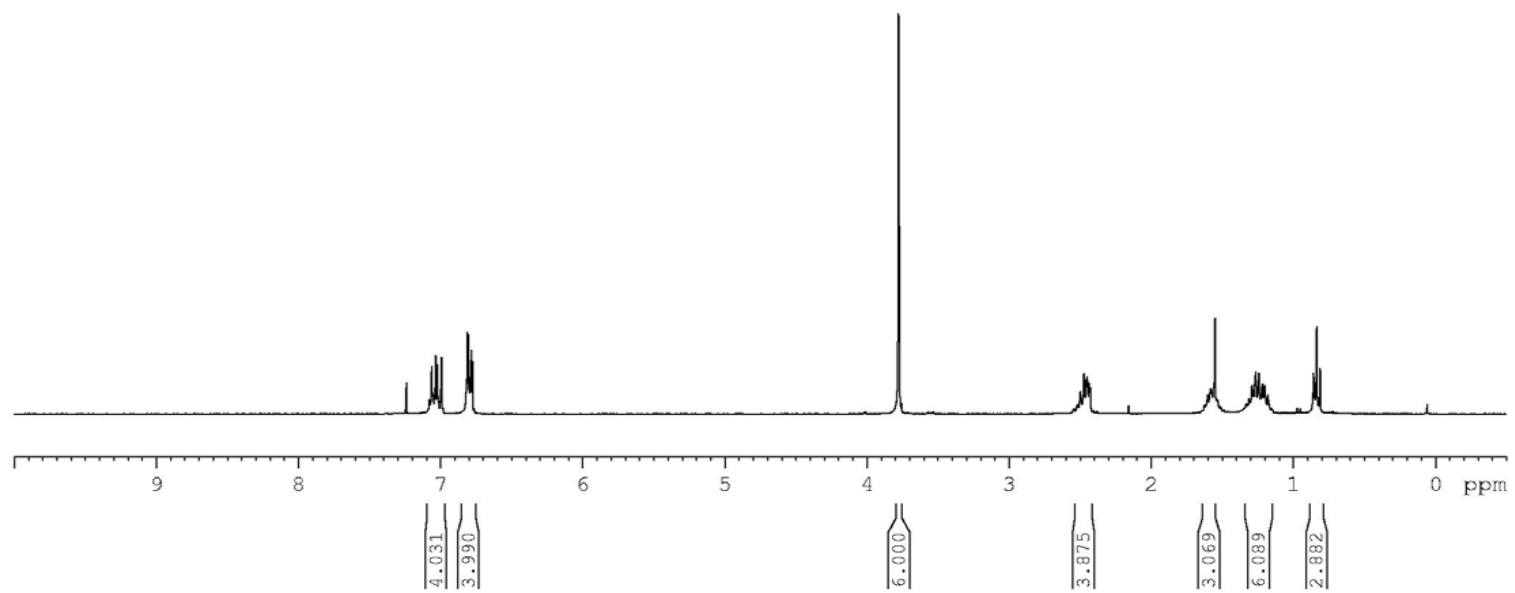

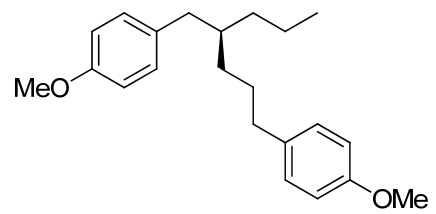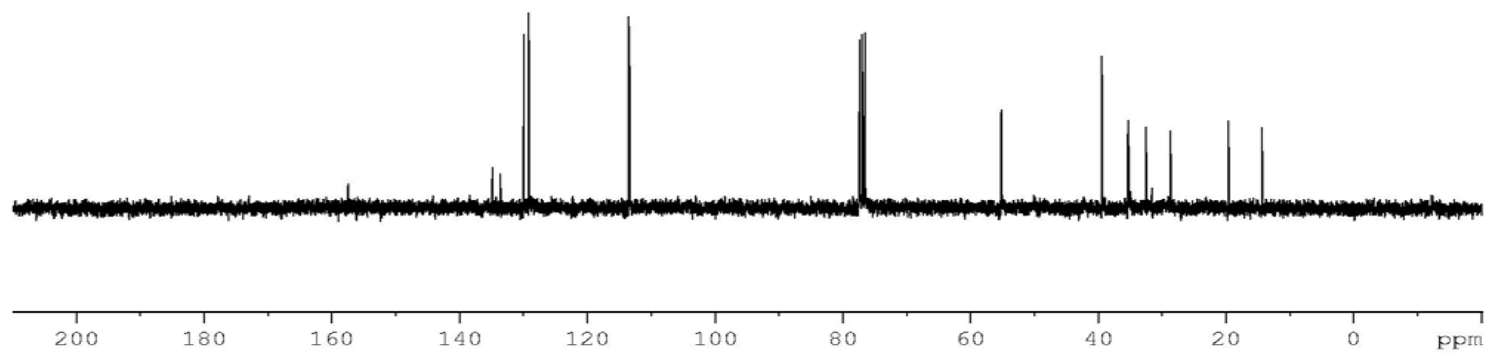

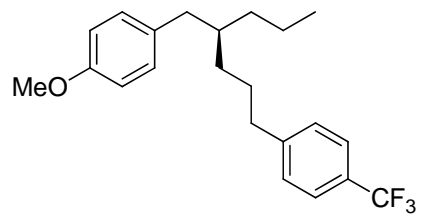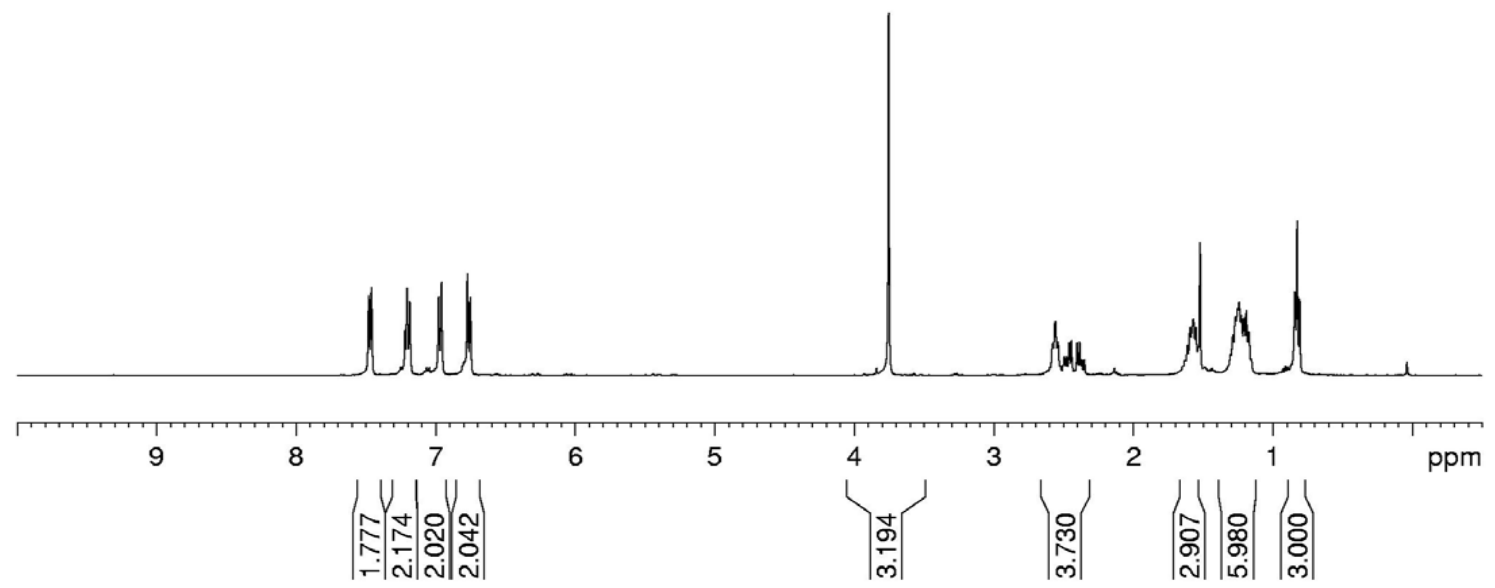

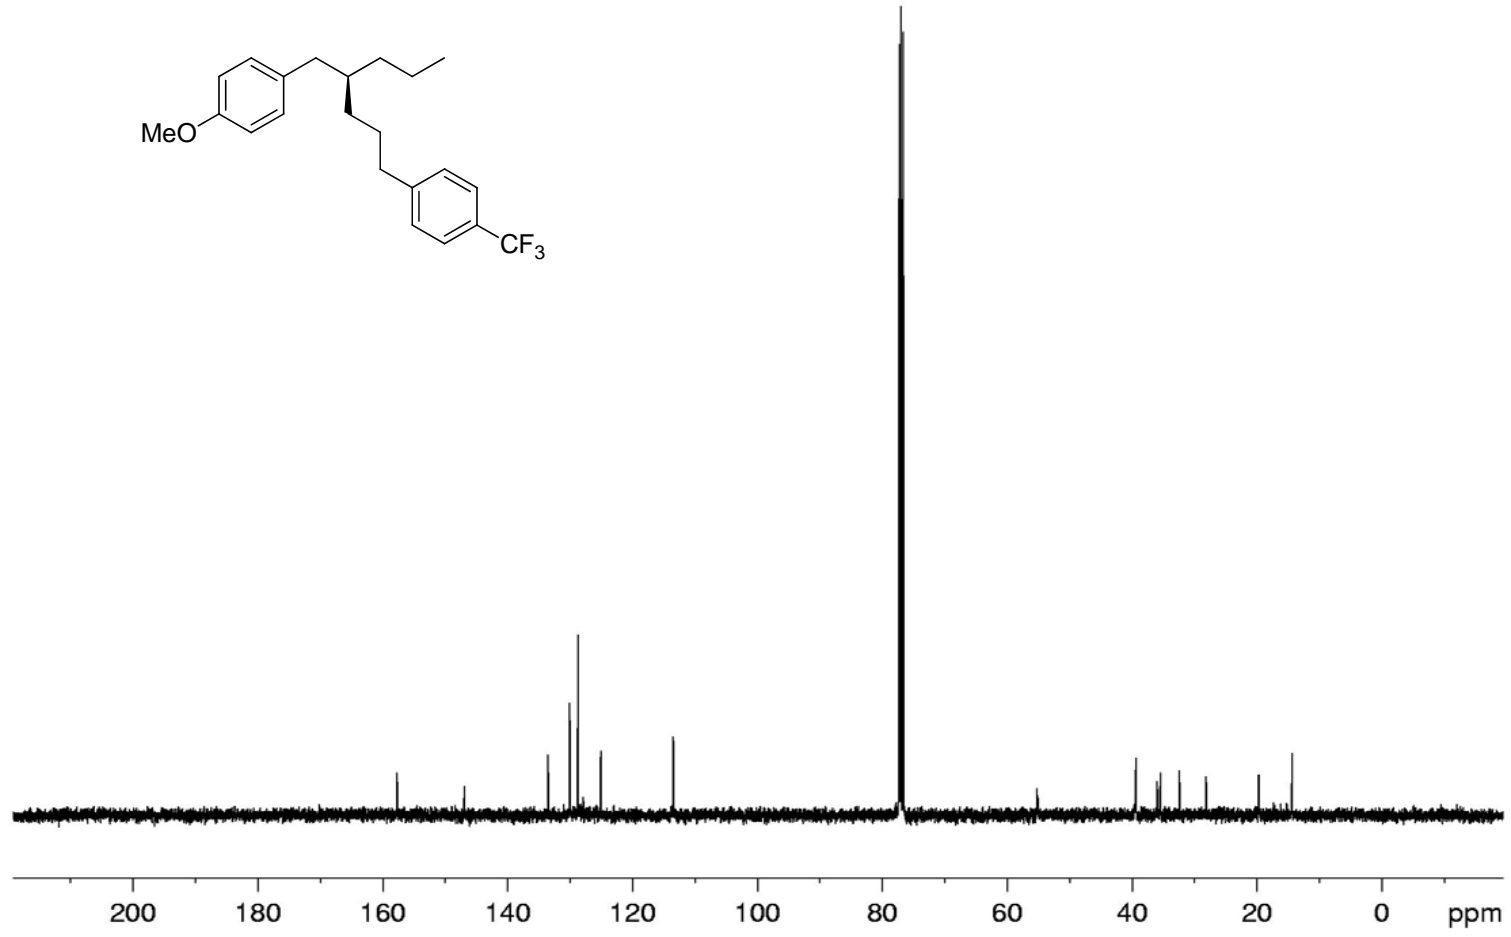



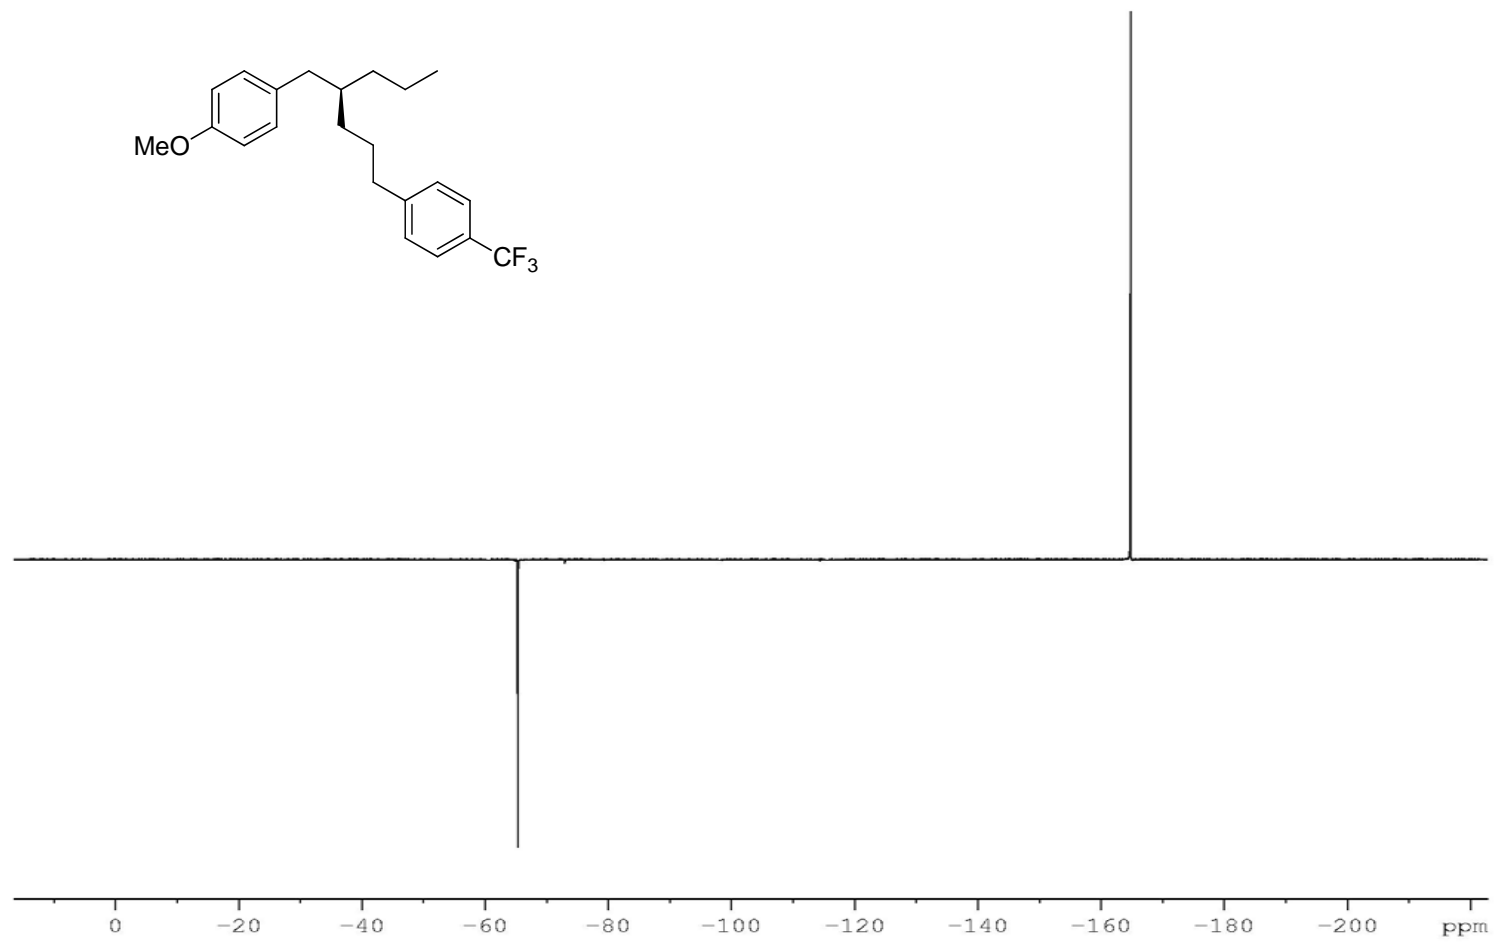

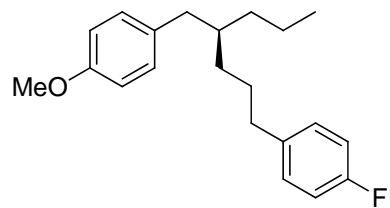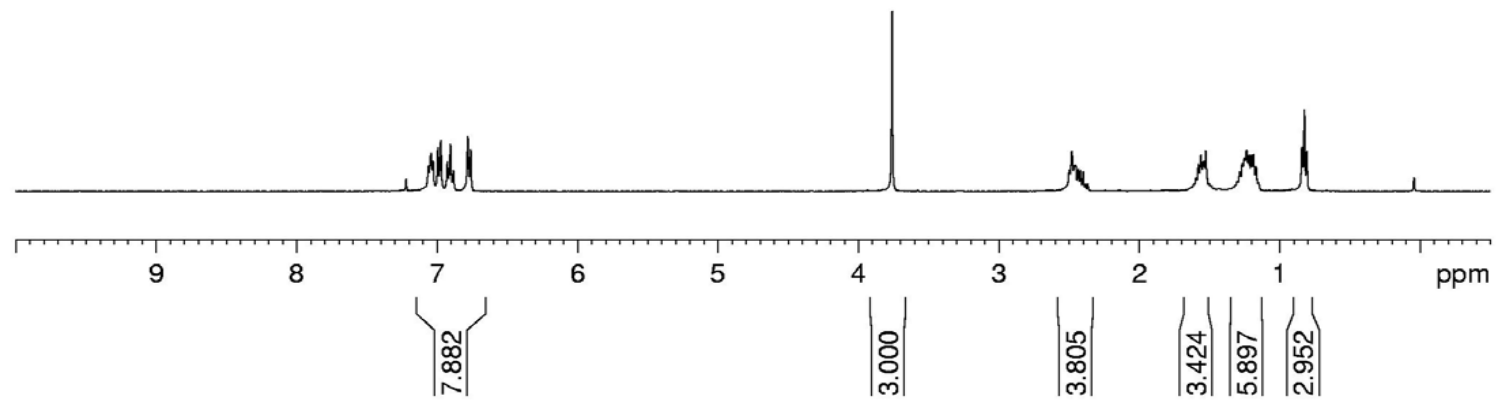

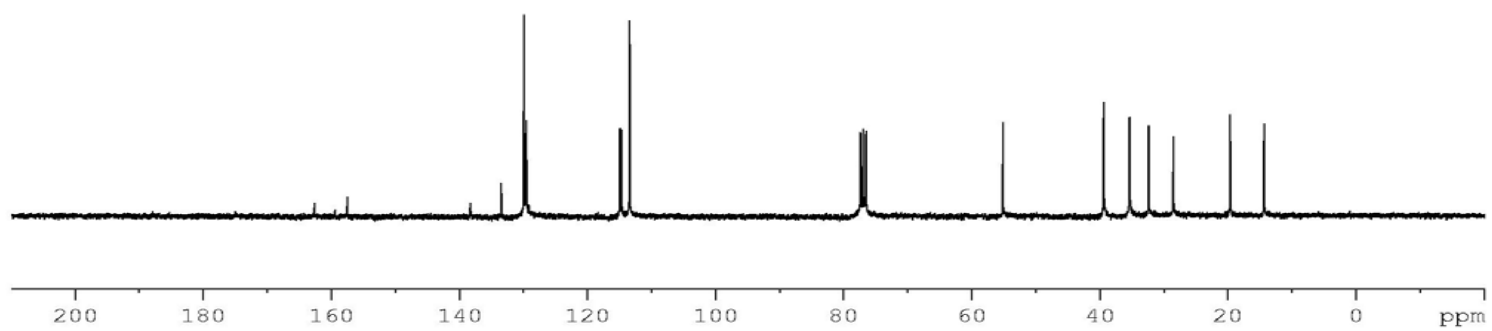

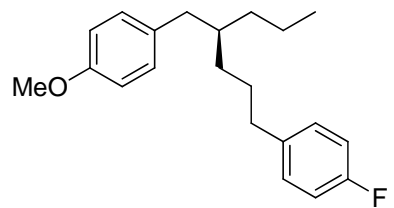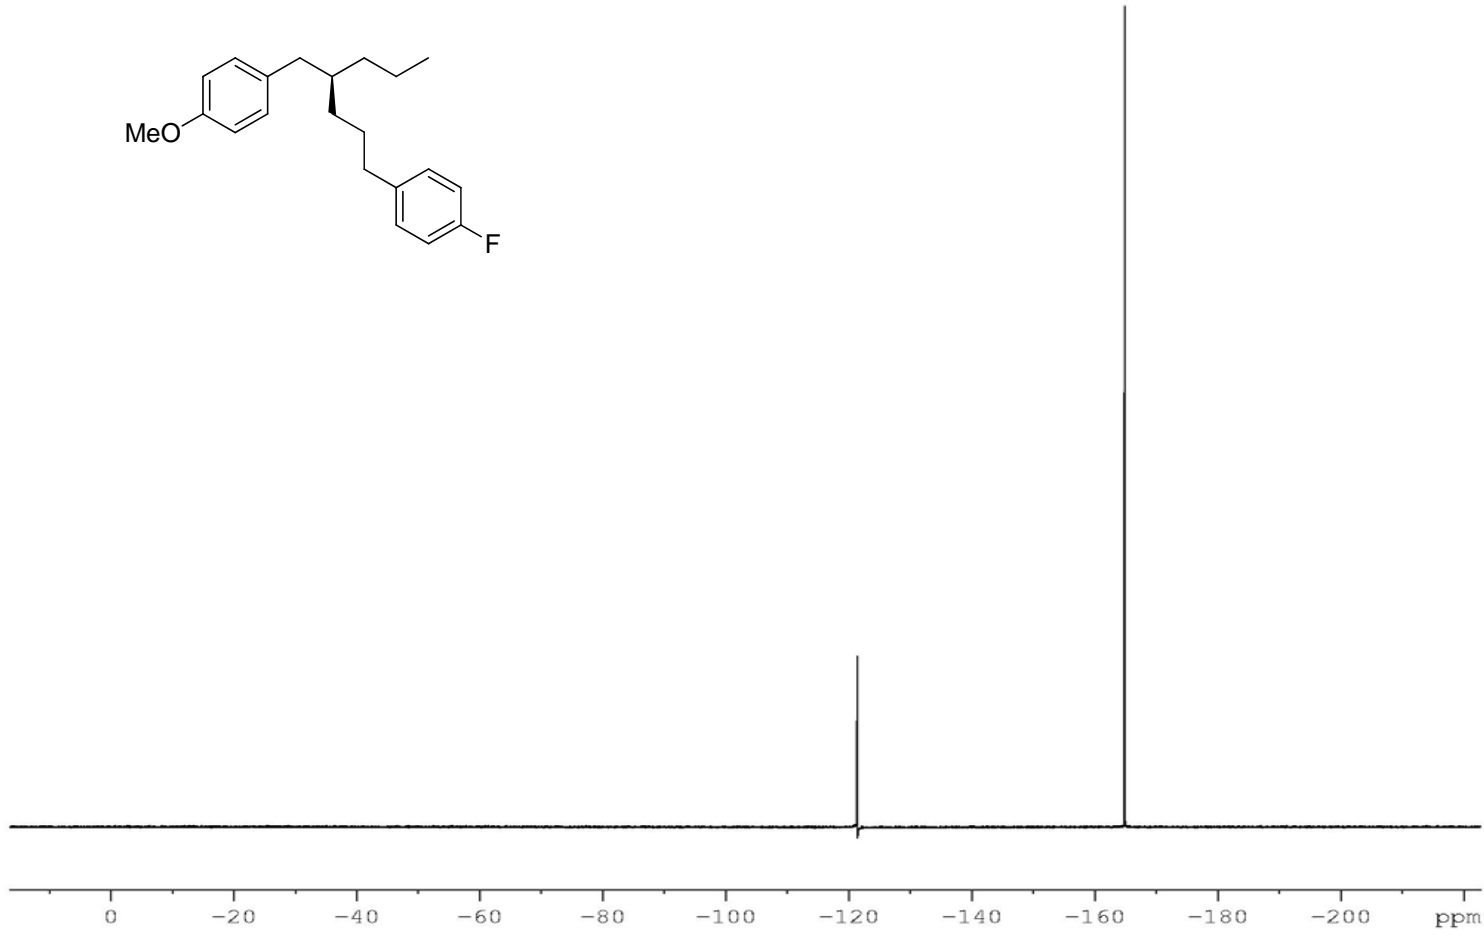

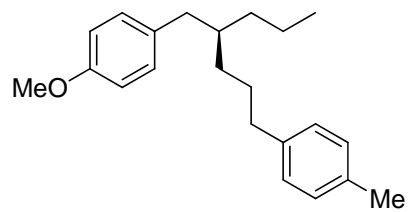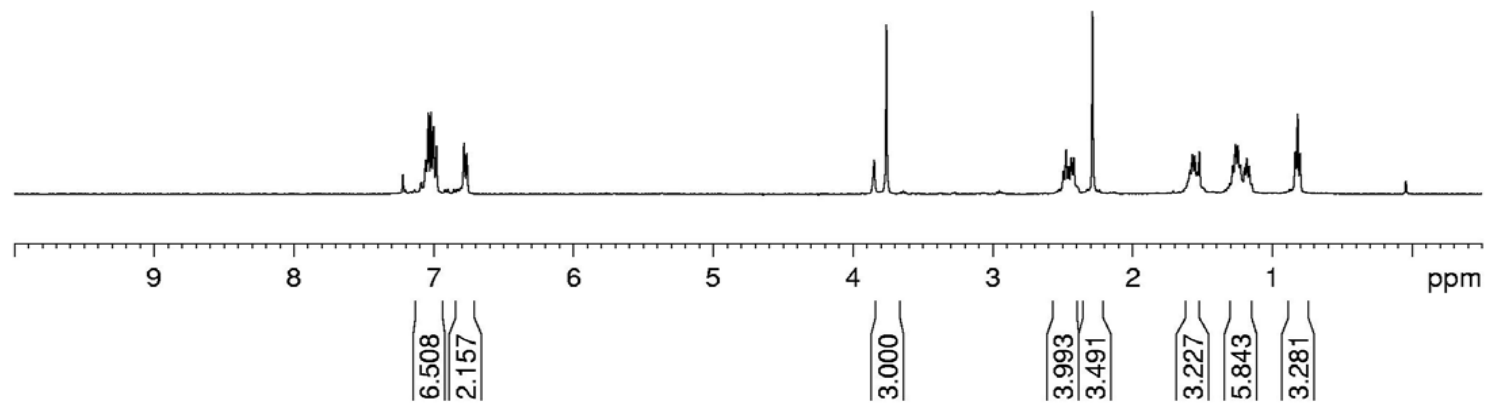

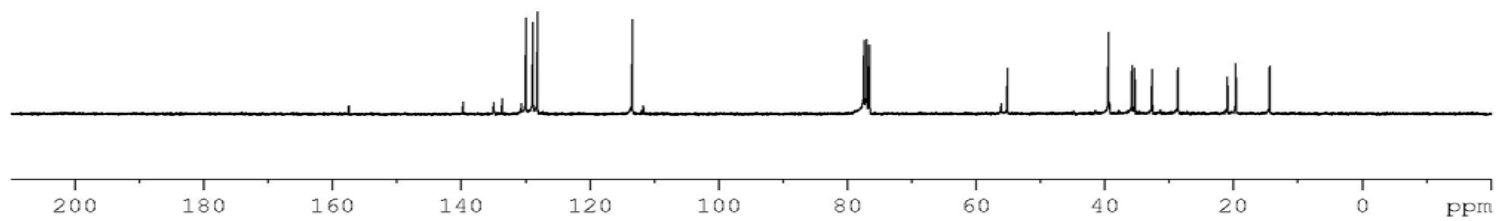

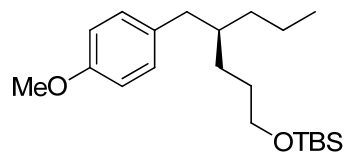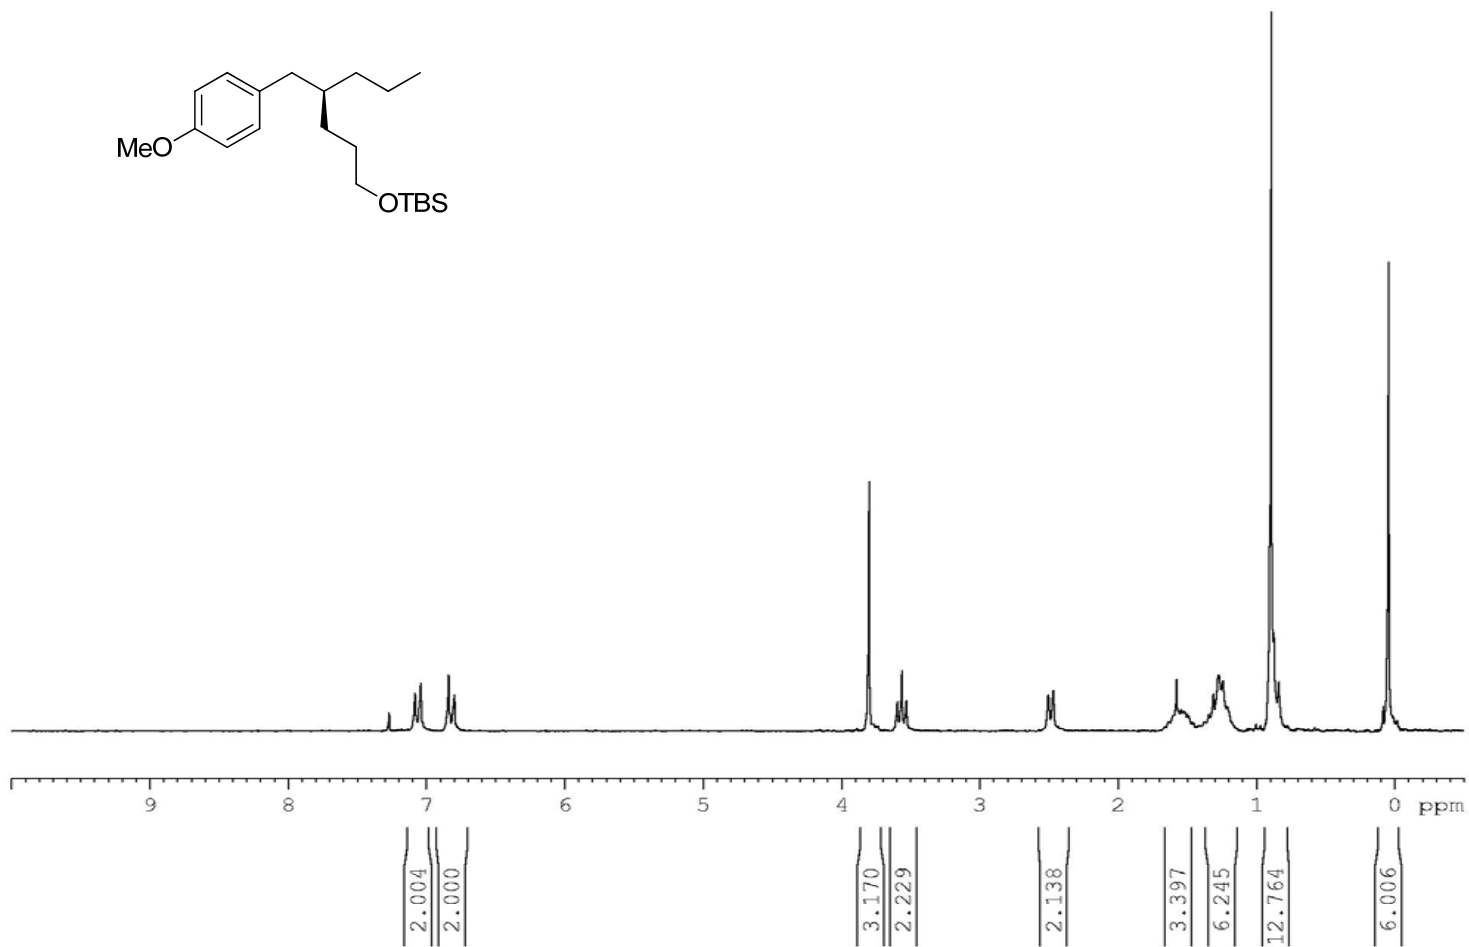

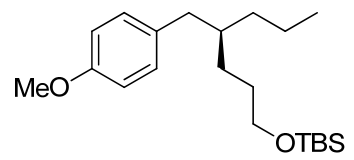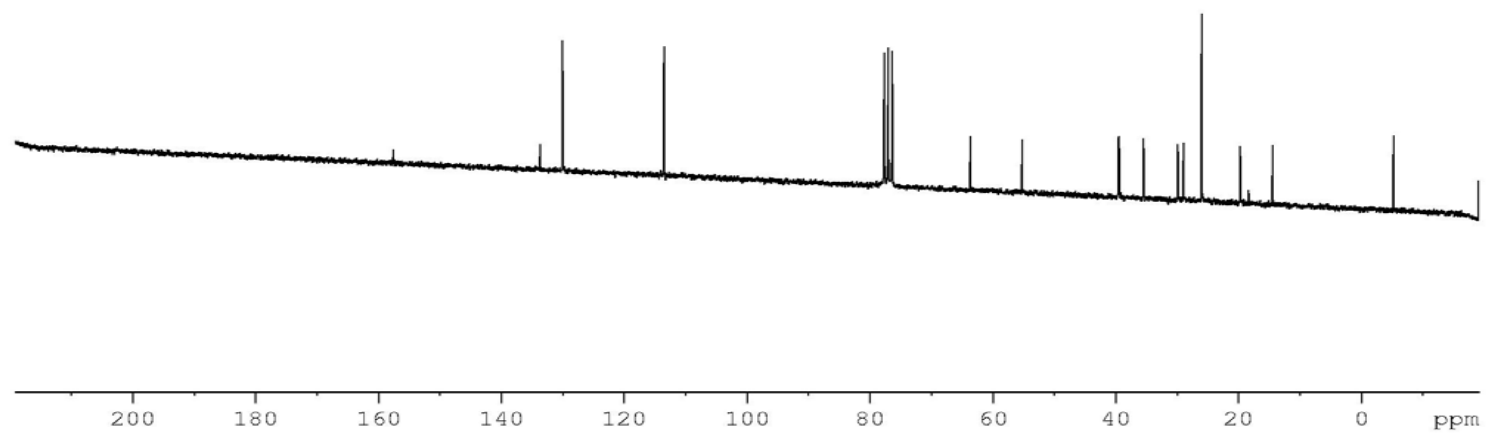



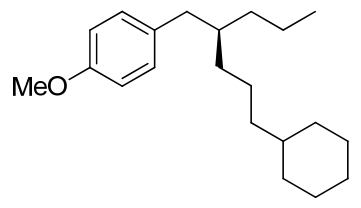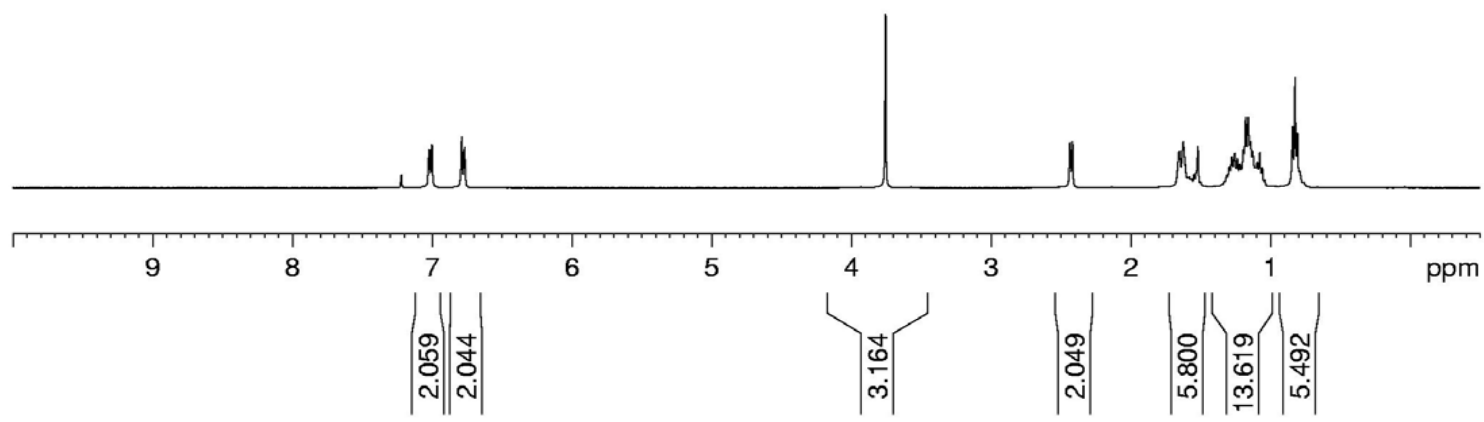

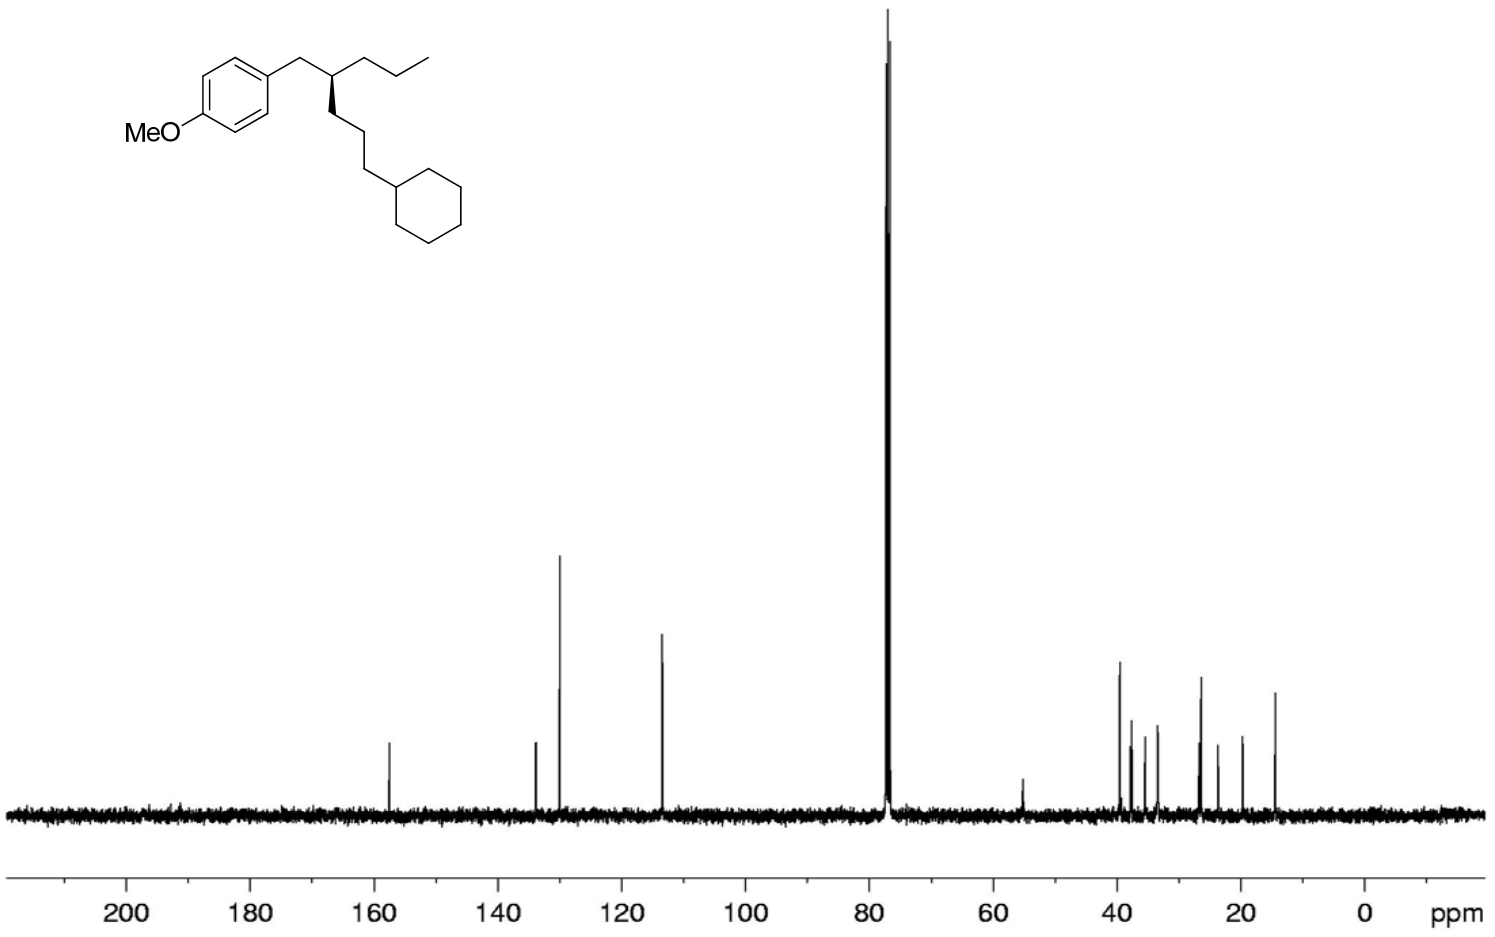

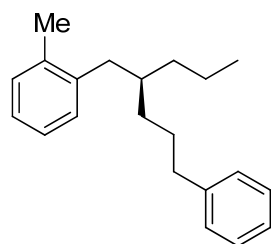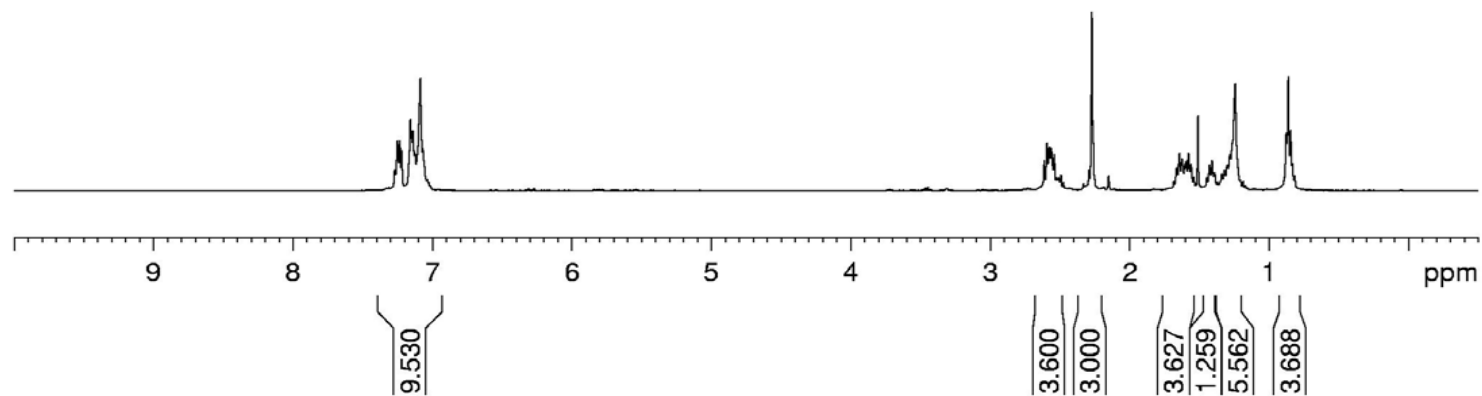

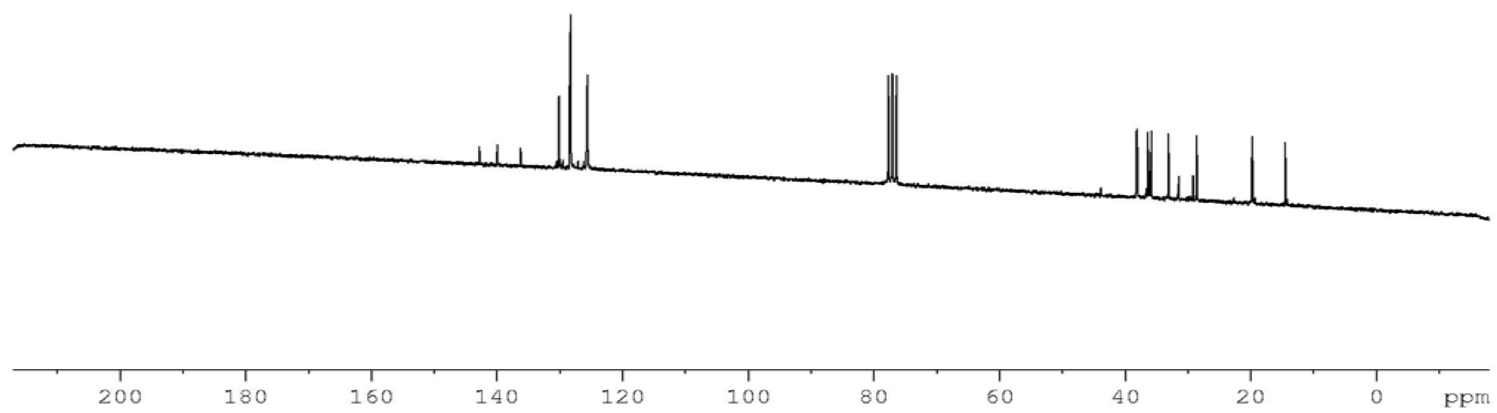

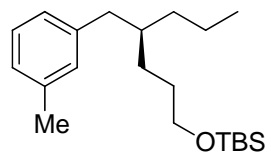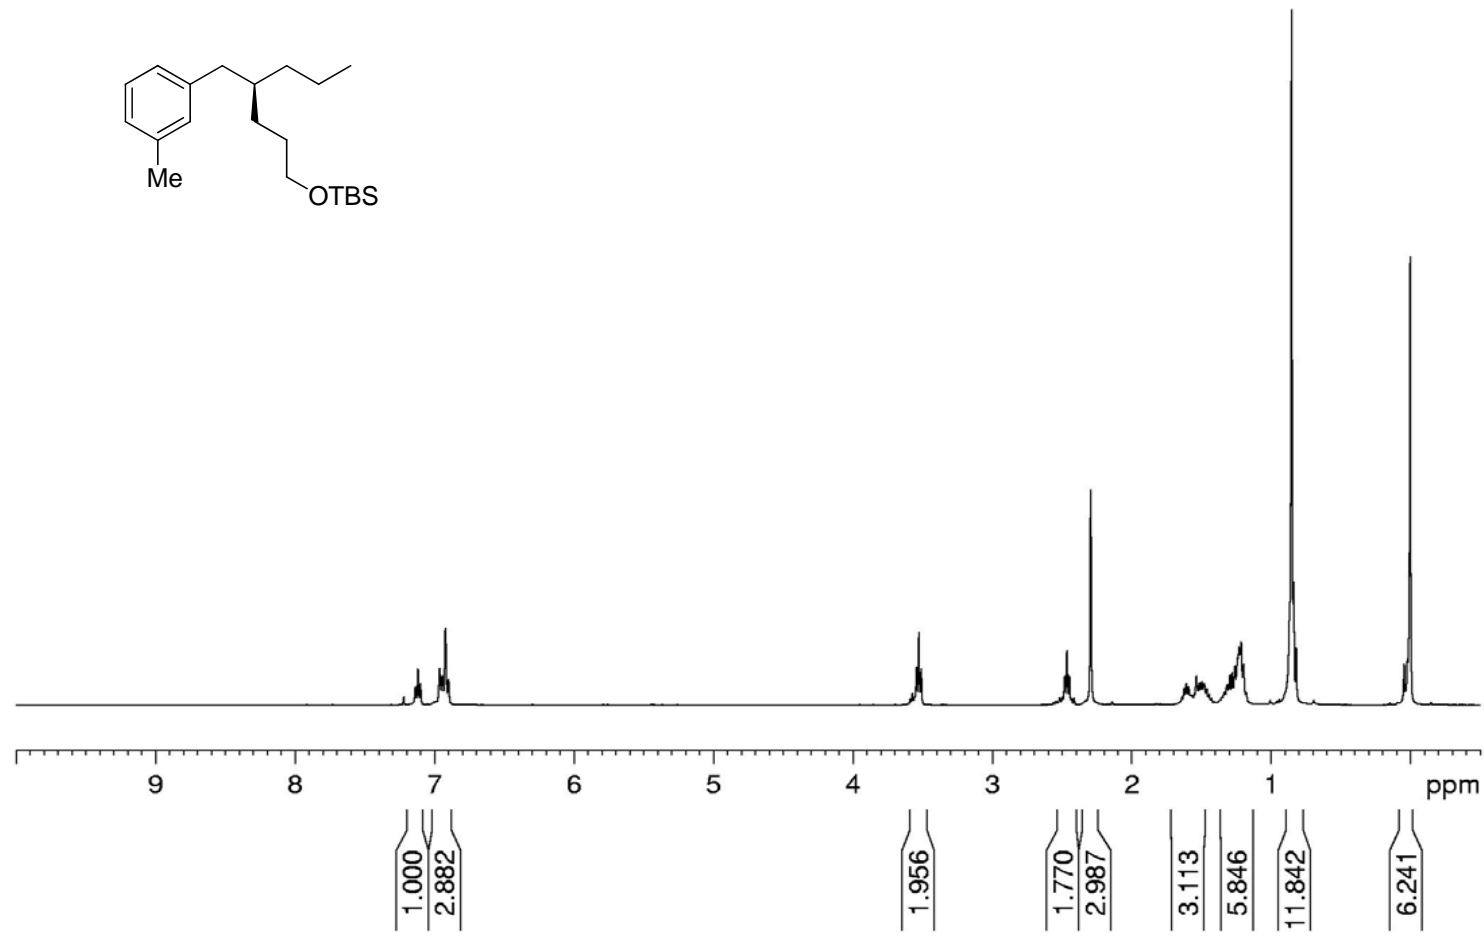

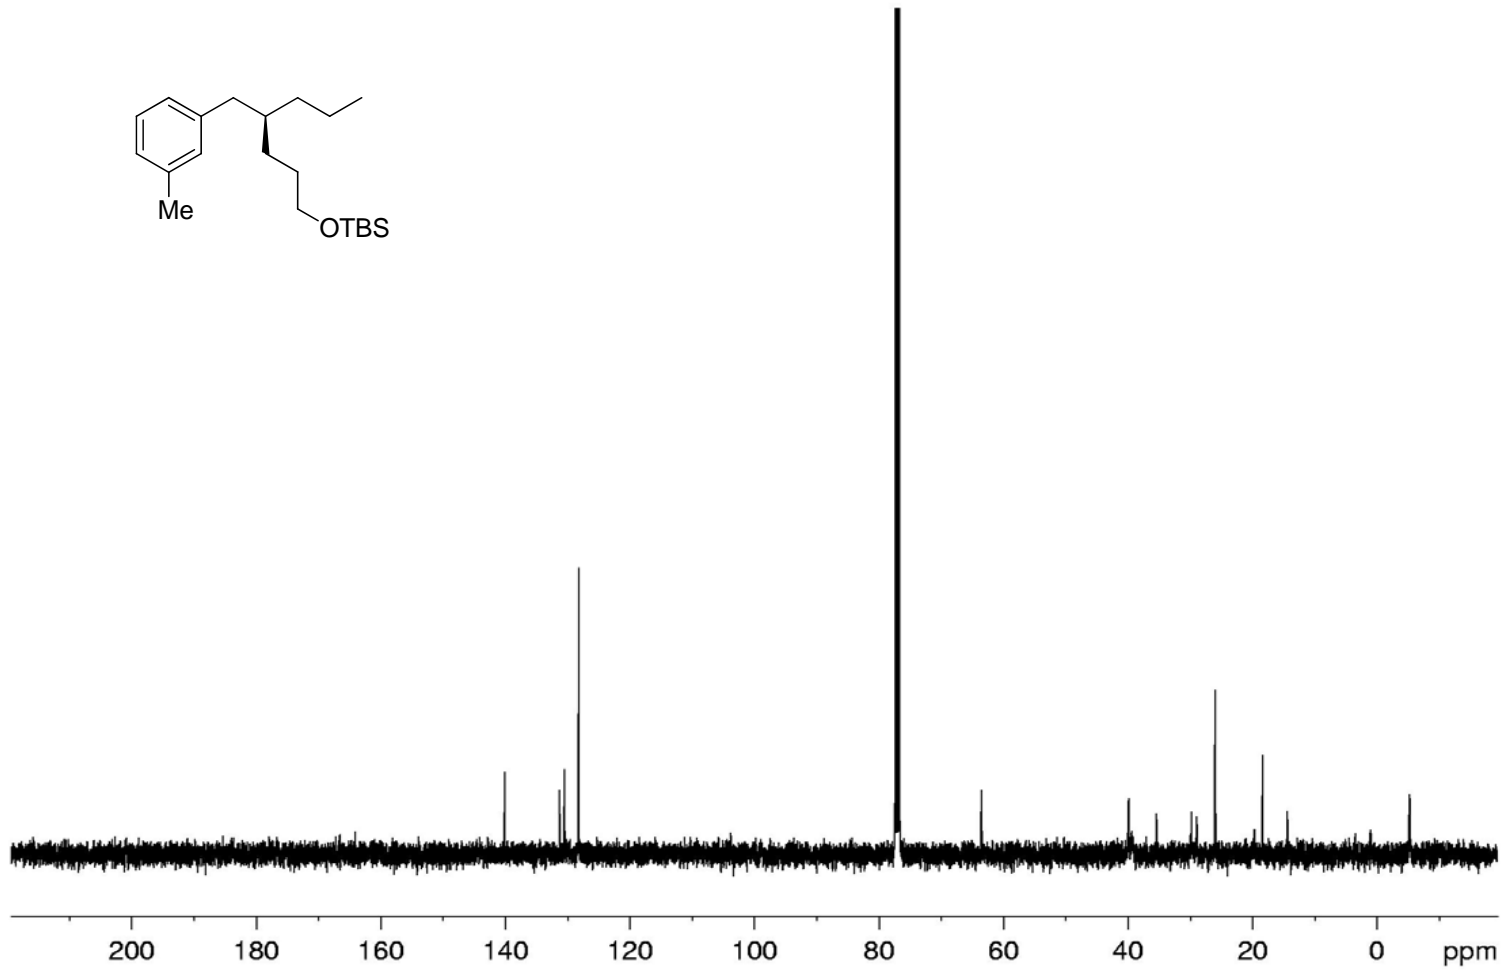

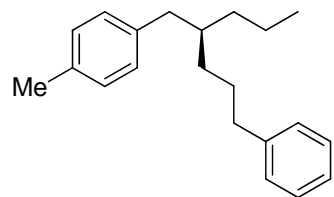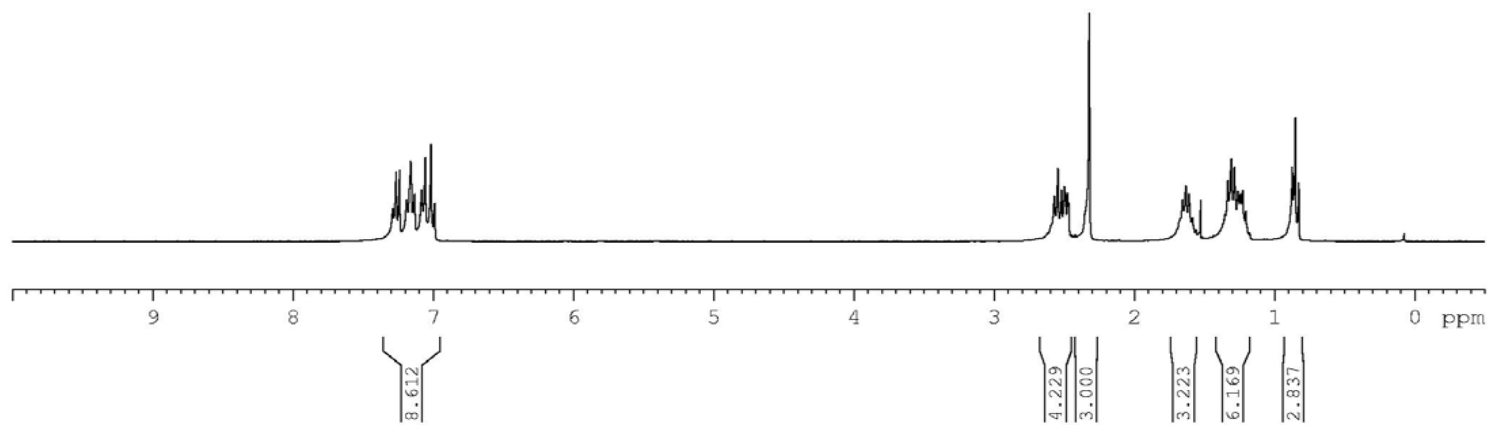

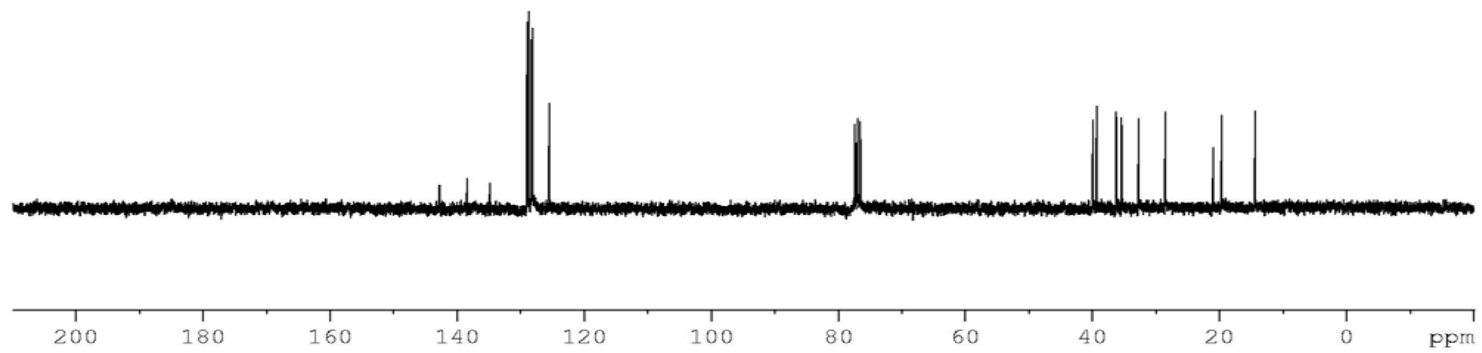



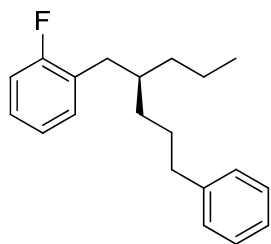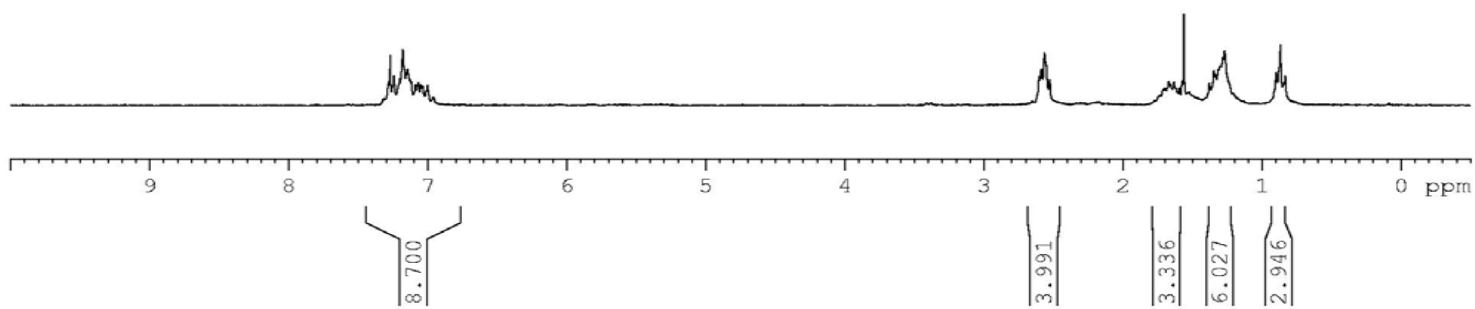

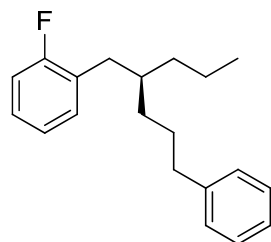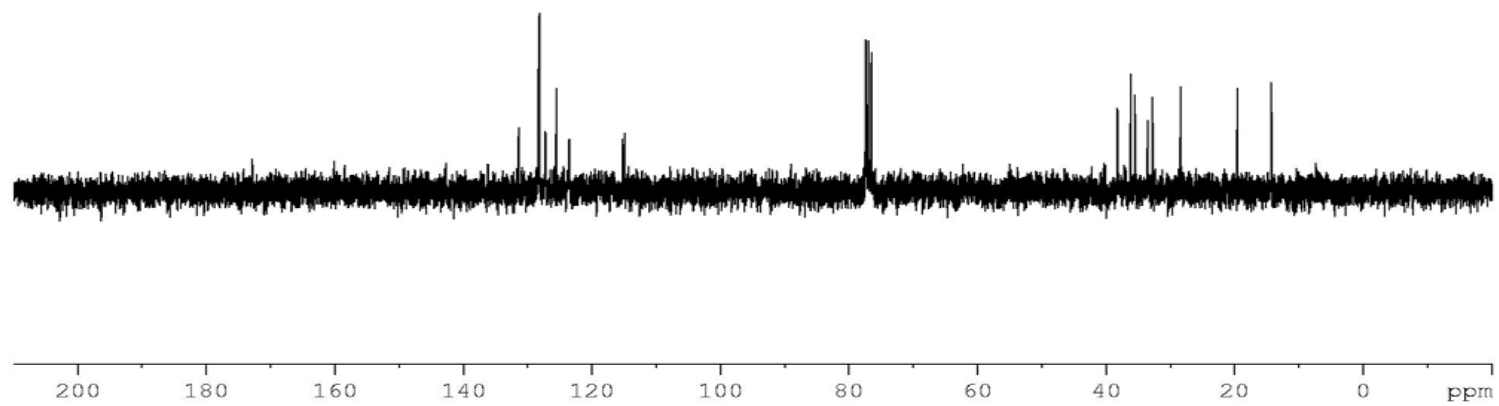

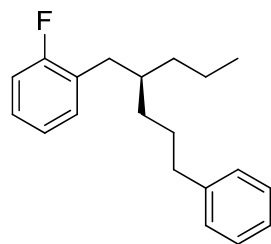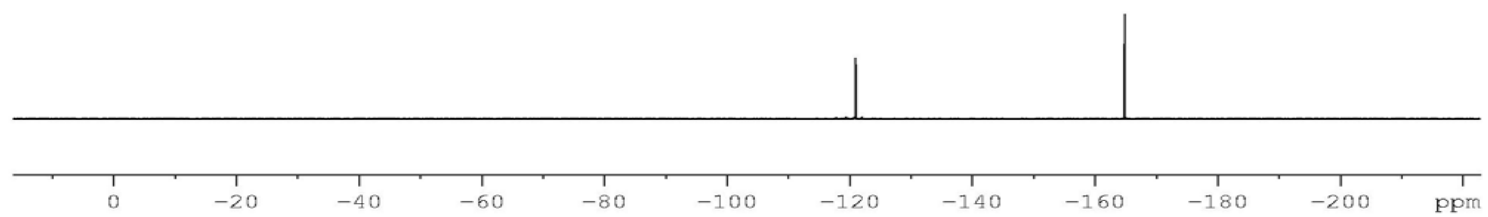

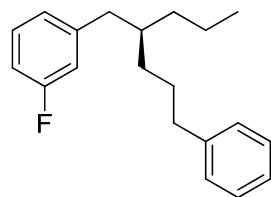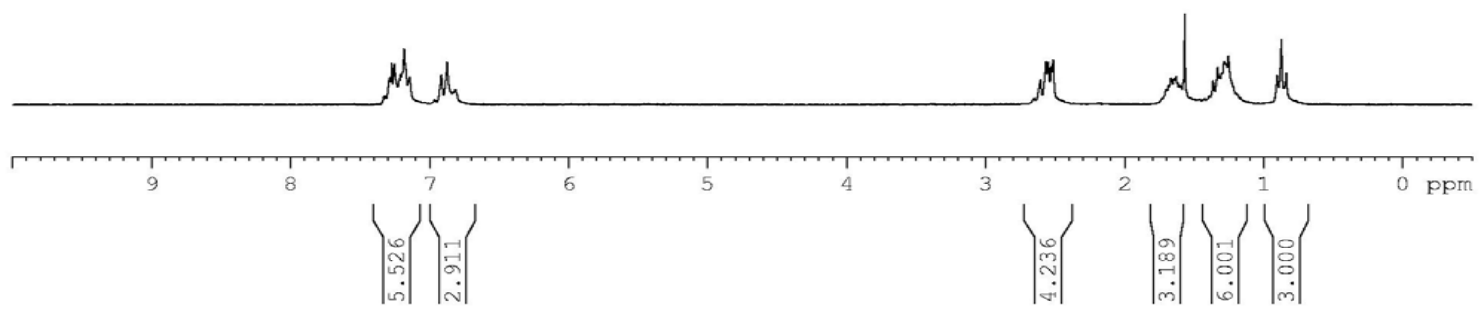

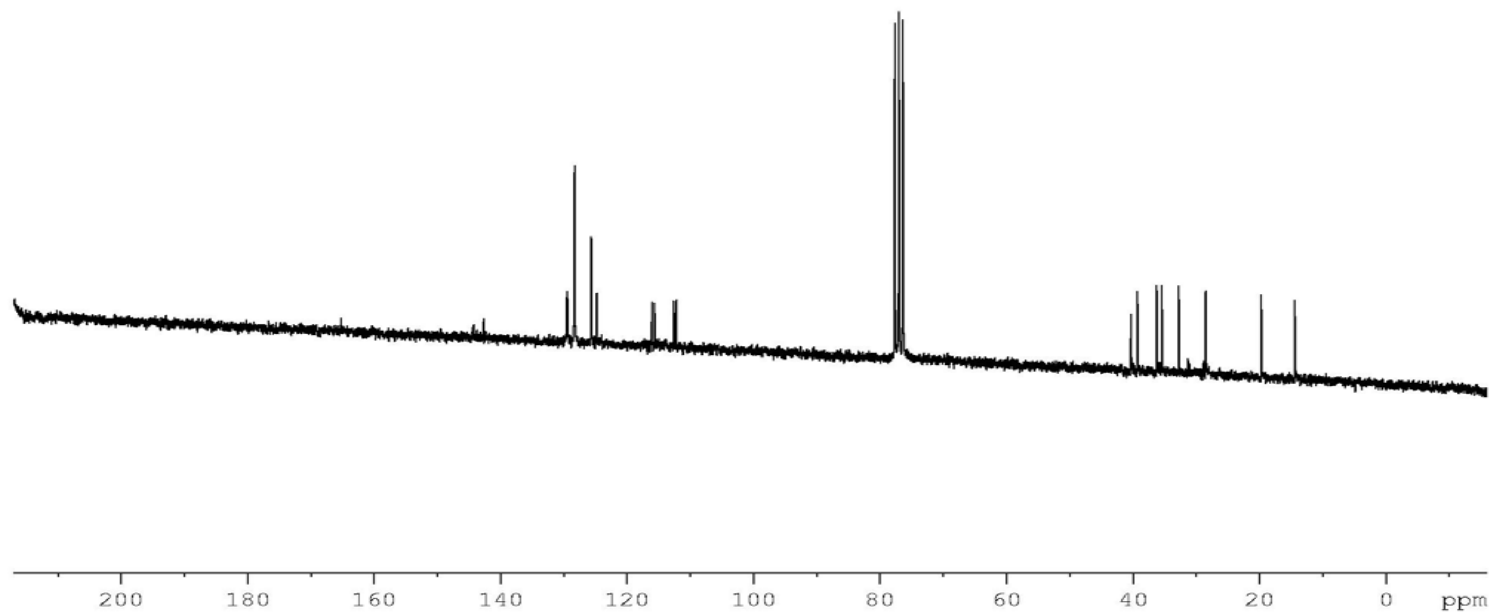

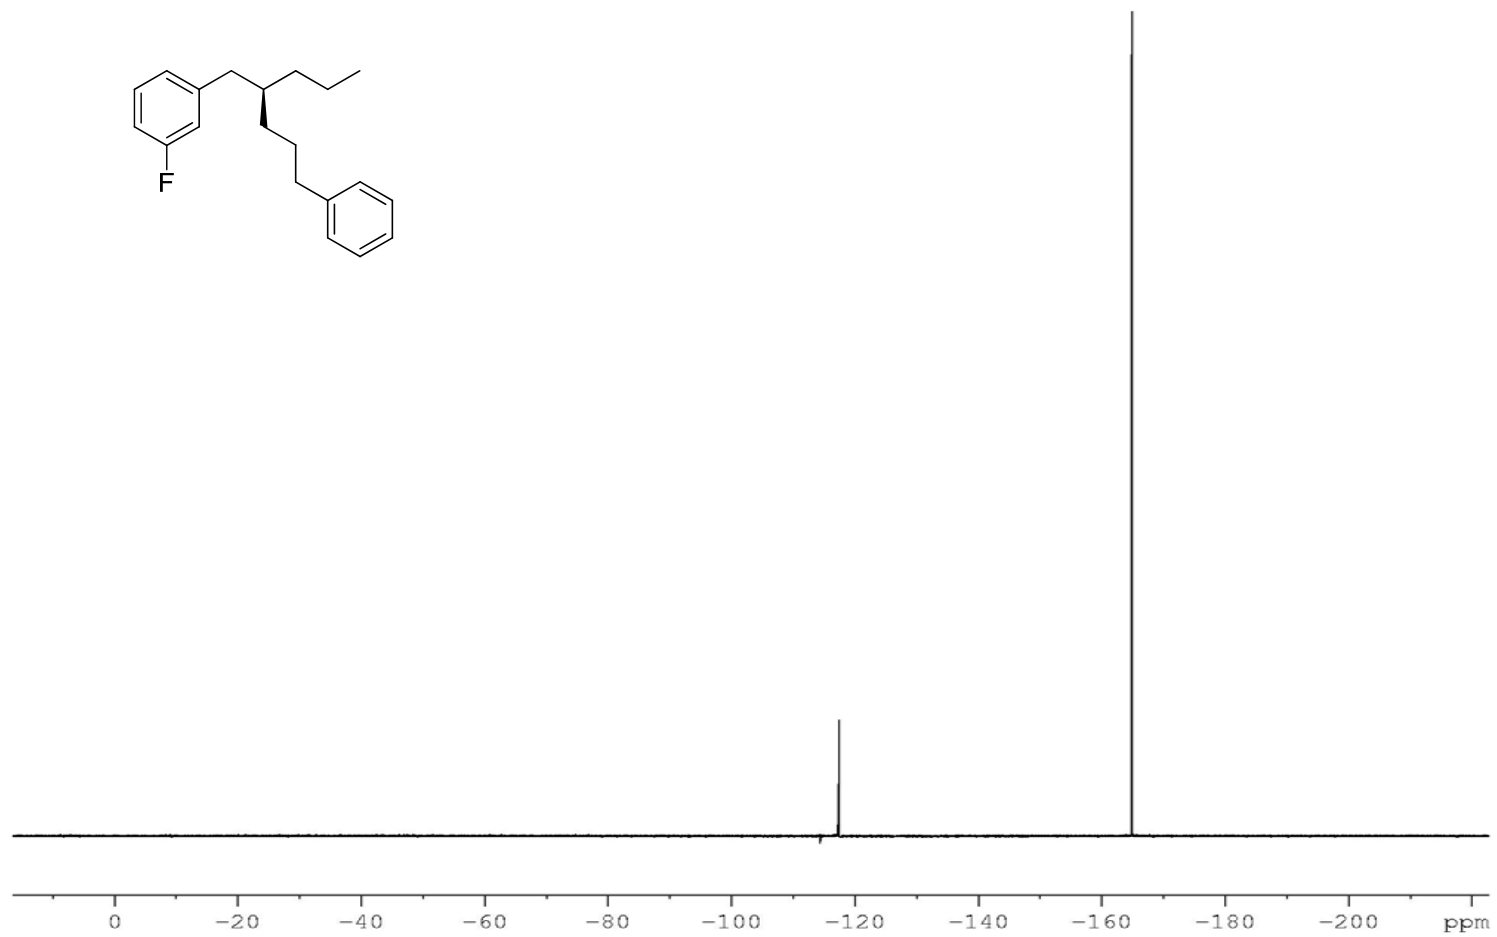

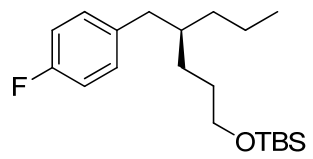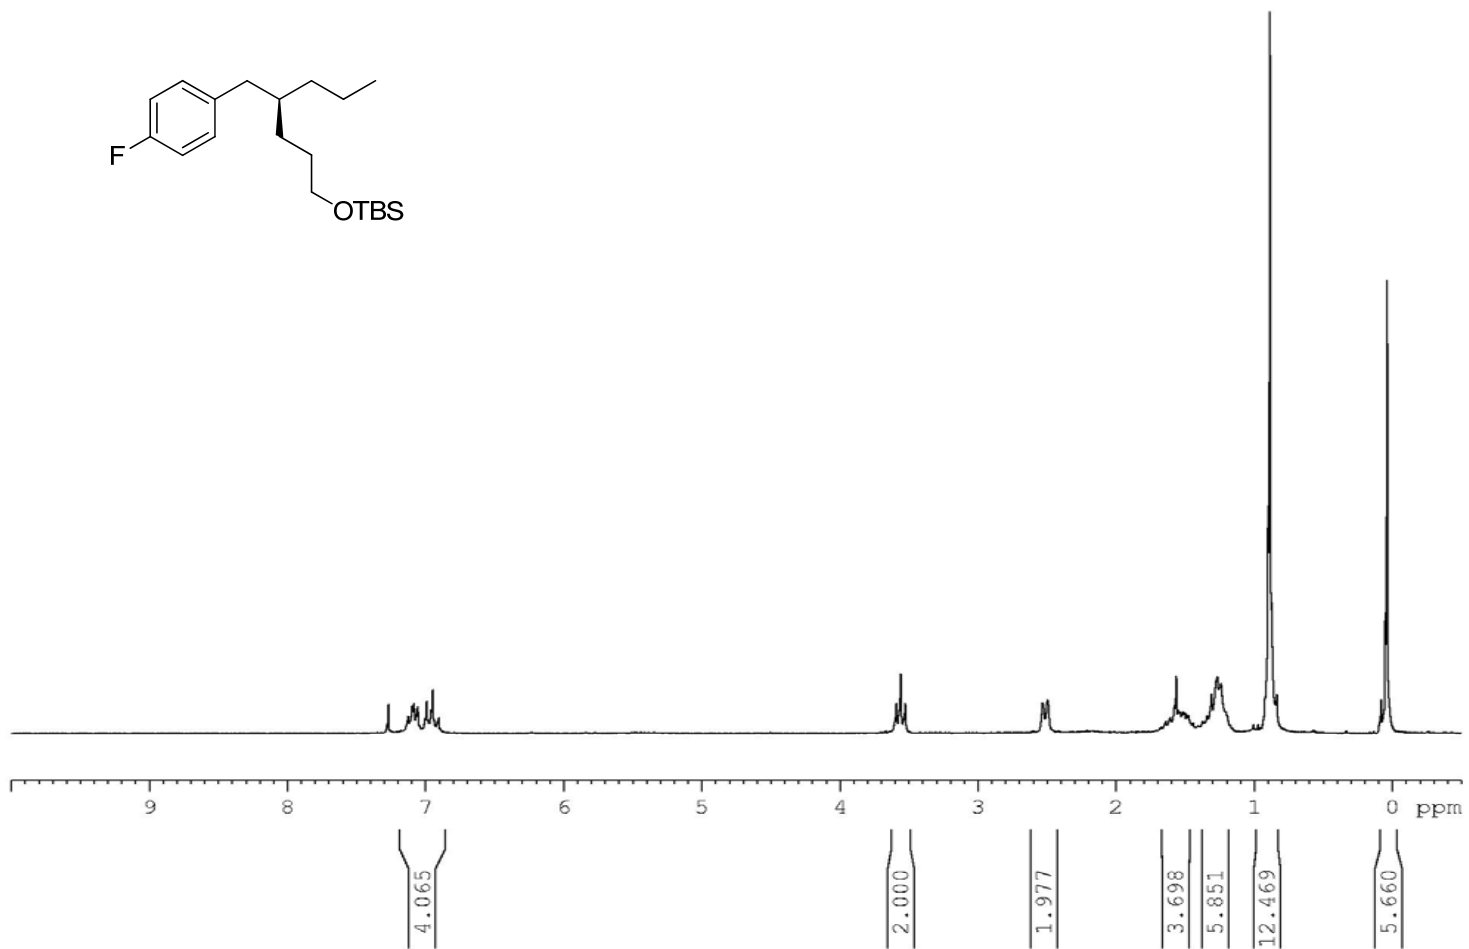

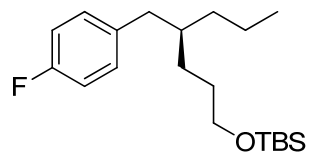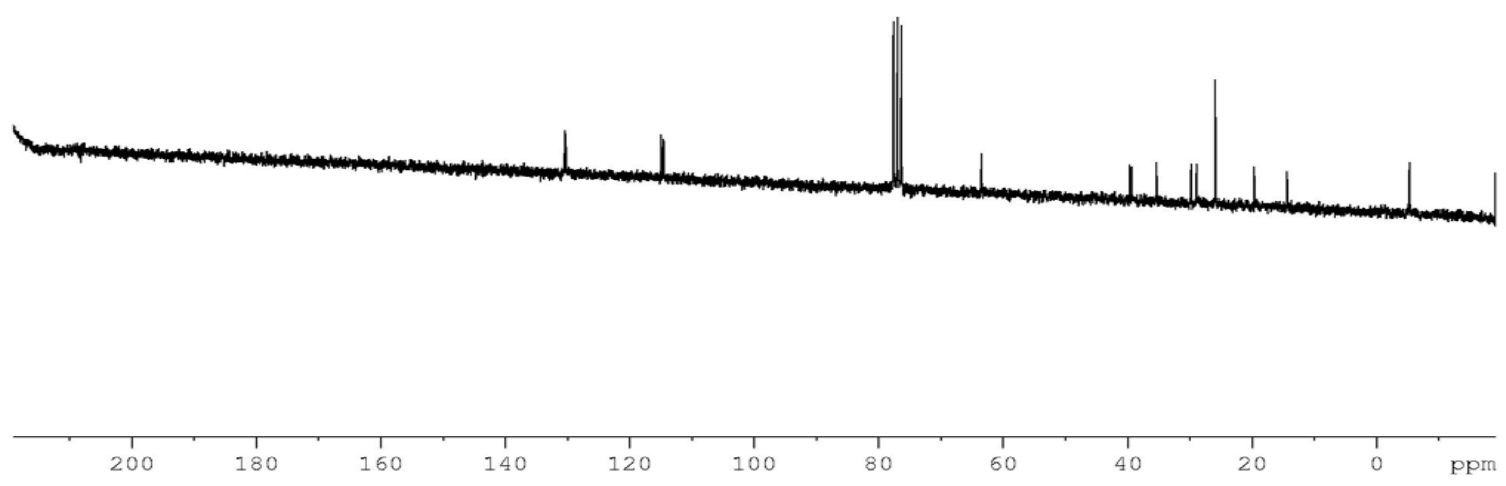



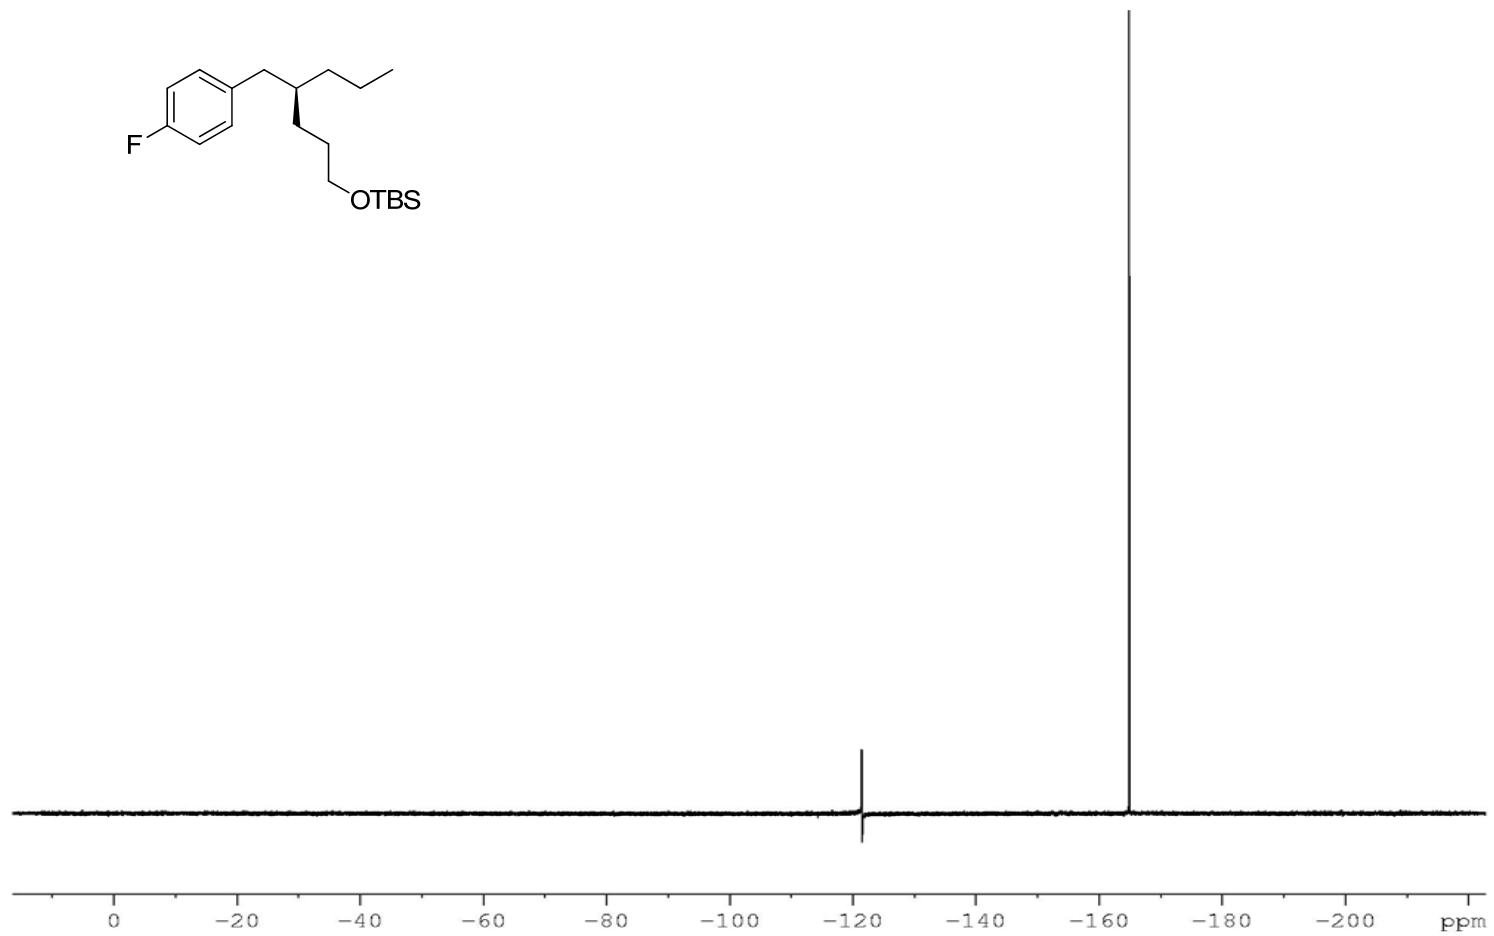

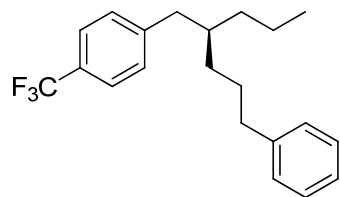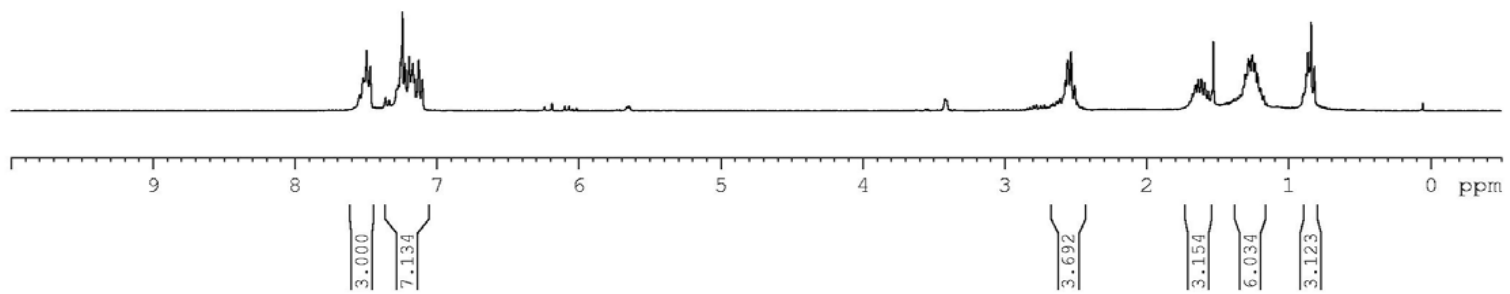

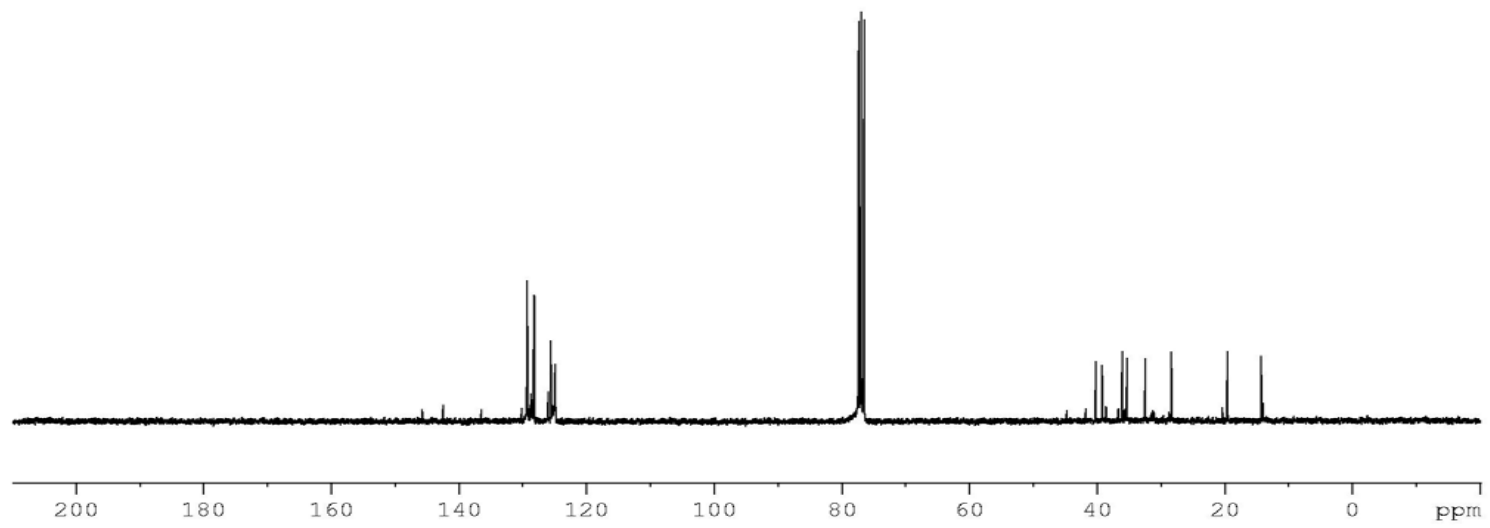

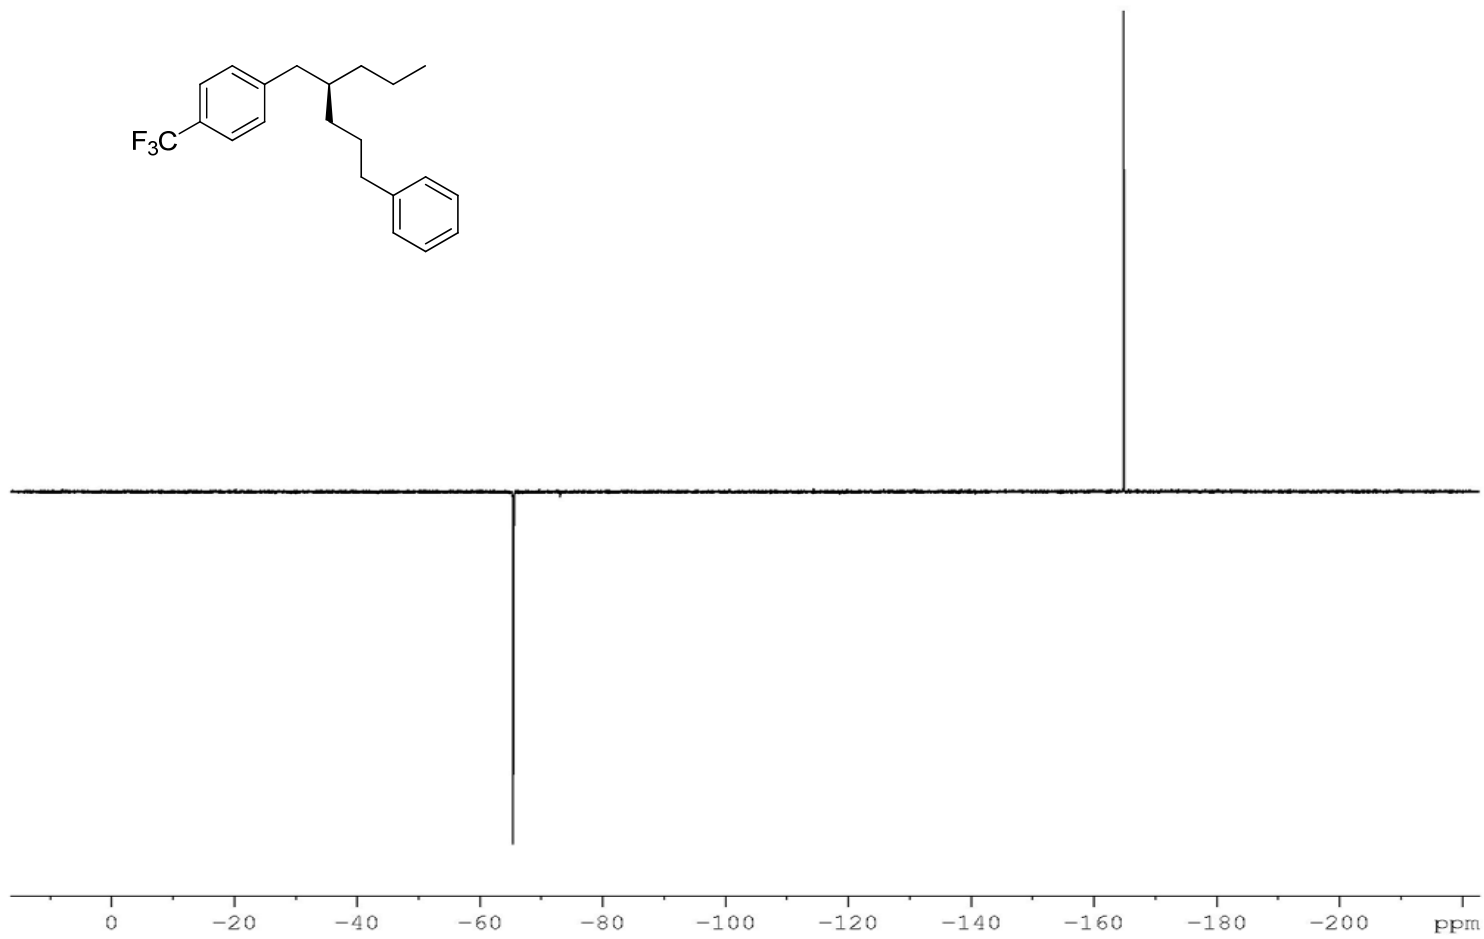

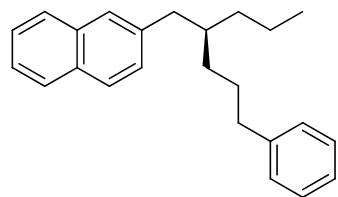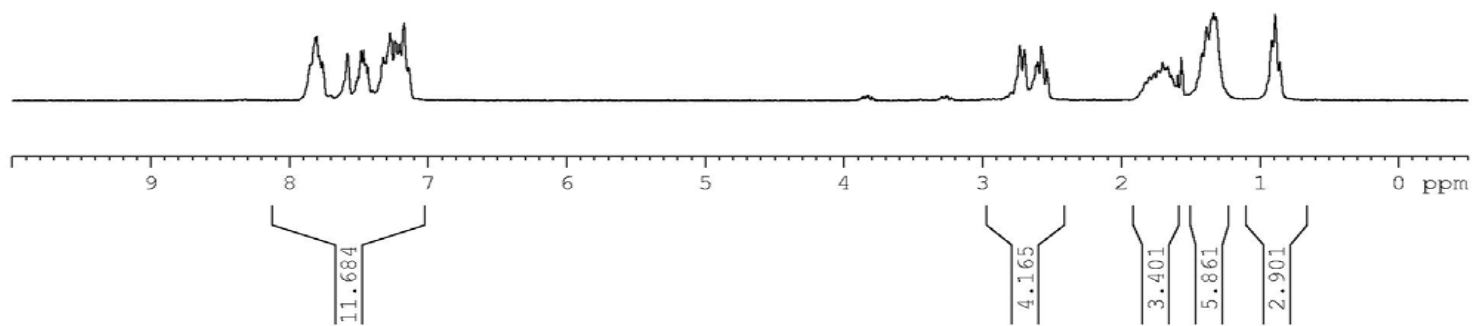

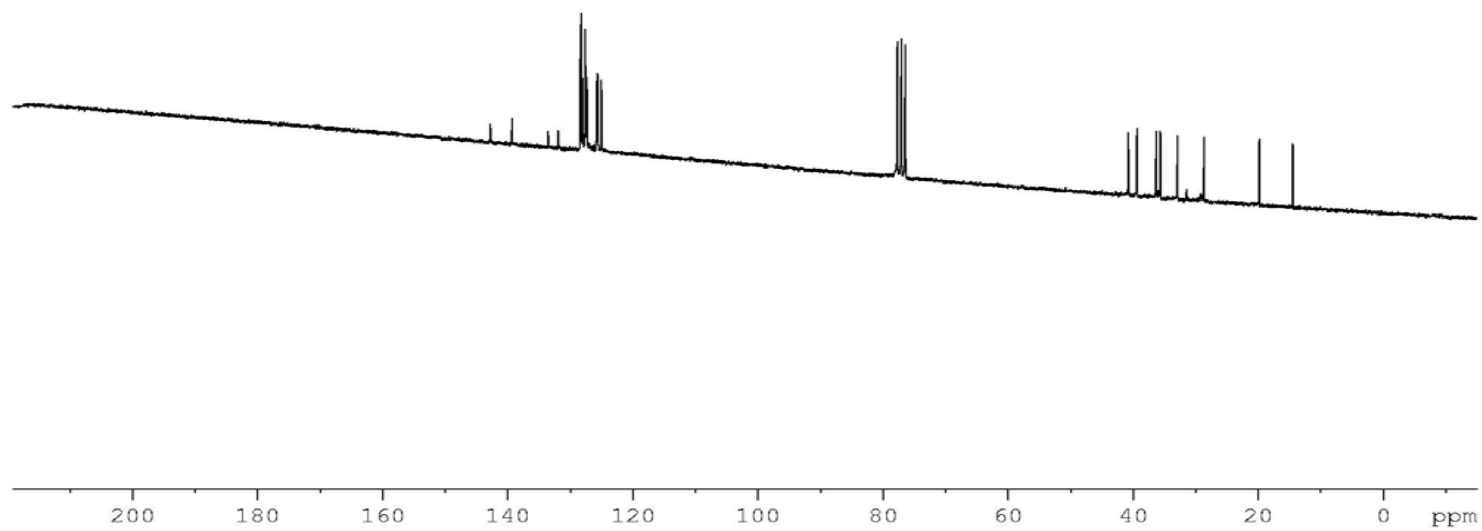

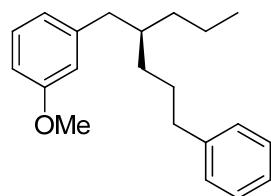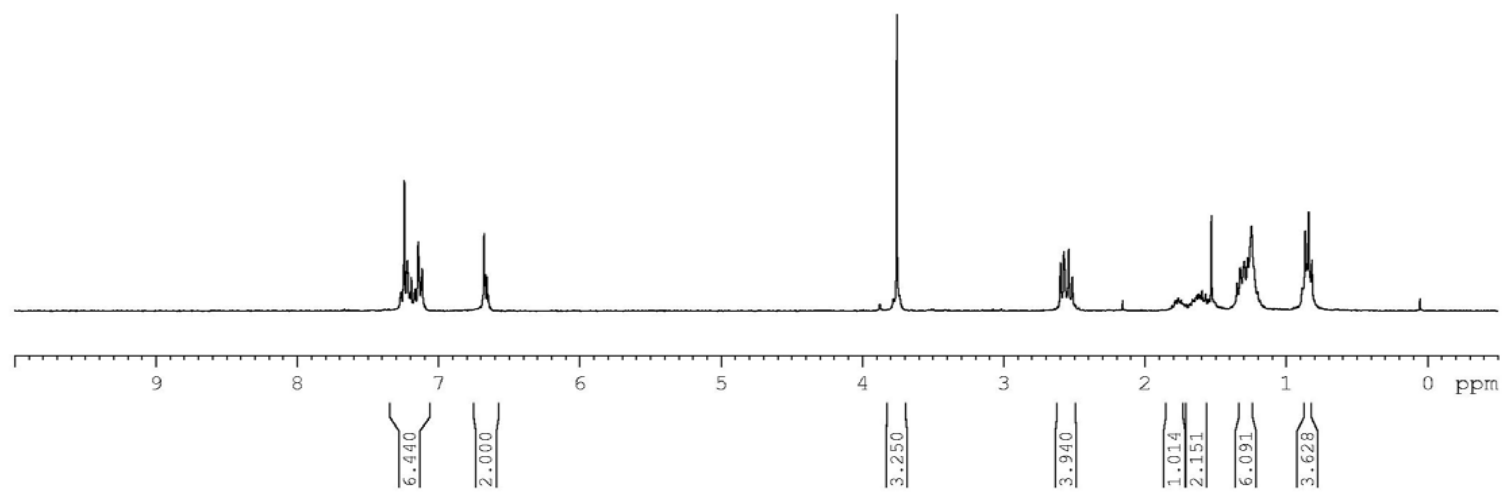

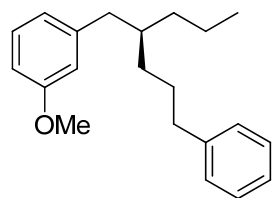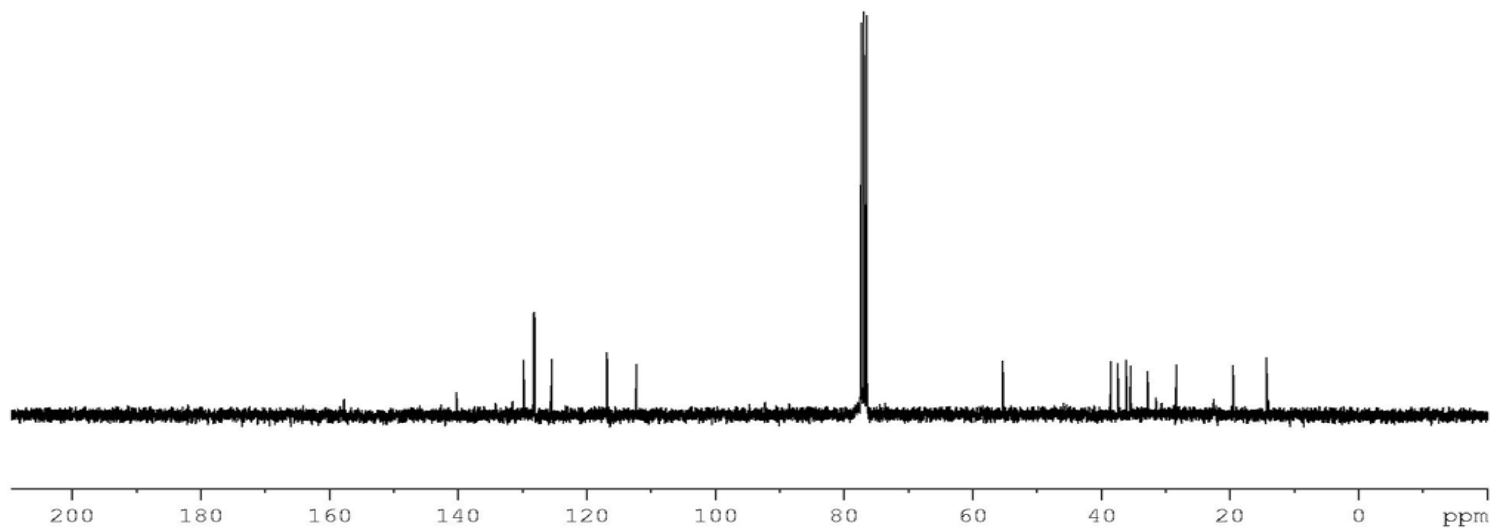



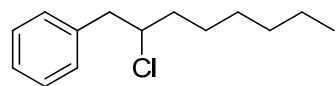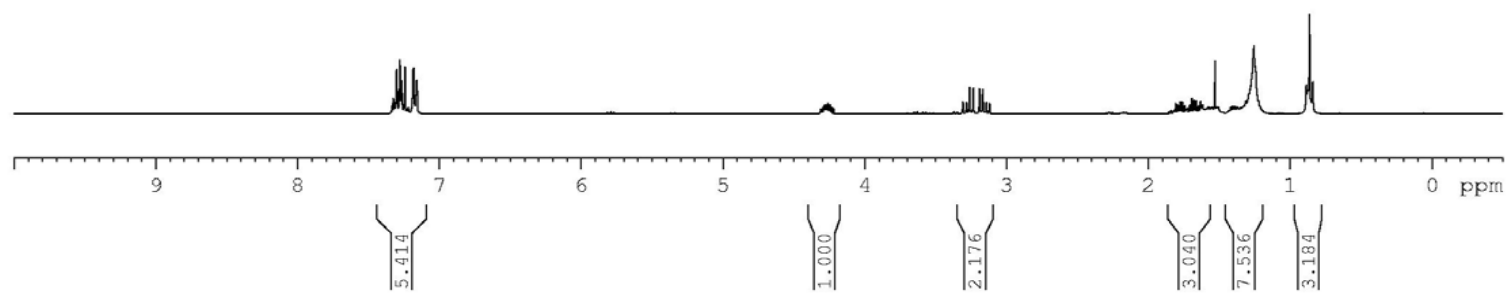

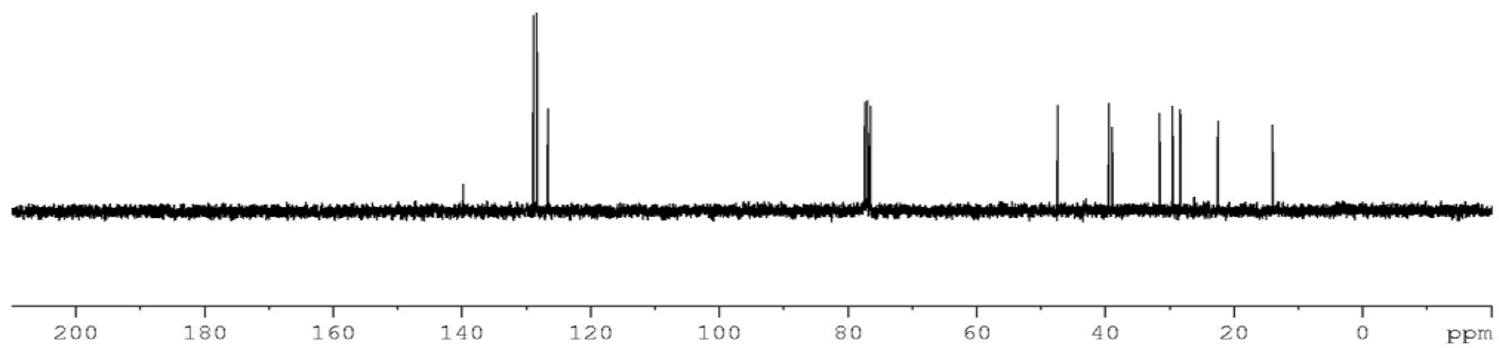

Supplement: c5sc04378f1.pdf [file c5sc04378f1.pdf]
